# Supplementary material for: Visible-light-promoted decarboxylative addition cyclization of N-aryl glycines and azobenzenes to access 1,2,4-triazolidines
Source: Royal Society of Chemistry journal article supplement (doi:10.1039/d1gc02272e), 2021-01-01

## Supporting Information

for

### Visible-light-promoted decarboxylative addition cyclization of *N*-aryl glycines and azobenzenes to access 1,2,4-triazolidines

Jingya Yang,<sup>\*a</sup> Menghui Song,<sup>a</sup> Hongyan Zhou,<sup>\*a,b</sup> Yanfang Qi,<sup>a</sup> Ben Ma<sup>a</sup> and Xi-Cun Wang<sup>a</sup>

<sup>a</sup>College of Chemistry and Chemical Engineering, Northwest Normal University, Lanzhou 730070, China

<sup>b</sup>College of Science, Gansu Agricultural University, Lanzhou 730070, China

E-mail: yangjy@nwnu.edu.cn; zhouhy@gsau.edu.cn

### List of Contents

|                                                                    |     |
|--------------------------------------------------------------------|-----|
| 1. General Information.....                                        | S1  |
| 2. Optimization of Reaction Conditions.....                        | S2  |
| 3. General Procedure for the Synthesis of 1,2,4-Triazolidines..... | S2  |
| 4. Procedure for the Gram-Scale Synthesis of <b>3</b> .....        | S3  |
| 5. Unsuccessful Substrates.....                                    | S3  |
| 6. Crystallographic Structure Determination.....                   | S4  |
| 7. Mechanistic Studies.....                                        | S11 |
| 8. Characterization Data of Products.....                          | S15 |
| 9. References.....                                                 | S37 |
| 10. Copy of NMR Spectra.....                                       | S38 |

## 1. General Information

$^1\text{H}$  NMR,  $^{13}\text{C}$  NMR and  $^{19}\text{F}$  NMR spectra were recorded on a Varian Mercury-400 Plus spectrometer or an Agilent Technologies DD2 (600 MHz) in  $\text{CDCl}_3$ . Chemical shifts ( $\delta$ ) for NMR were quoted in ppm relative to the solvent peak (7.26 ppm for  $^1\text{H}$  and 77.00 ppm for  $^{13}\text{C}$  in  $\text{CDCl}_3$ ). Coupling constants  $J$  are recorded in Hz. High-resolution mass spectra (HRMS) were reported from the Thermo Orbitrap Elite with an ESI source. UV-Visible absorption spectra were recorded on an Agilent 8453 spectrophotometer. Photoluminescence spectra were obtained with a HORIBA FluroMax-4 Spectrofluorometer. Melting points (m.p.) were measured on an XT4A apparatus (uncorrected). The X-ray single-crystal diffraction was performed on an Agilent SuperNOVA instrument. Reactions were monitored by thin layer chromatography (TLC) using pre-coated silica gel plates (GF254). Flash column chromatography was performed on silica gel 60 (particle size 200–400 mesh ASTM, purchased from Liangchen, China) and eluted with petroleum ether /ethylacetate. The symmetrical azobenzenes were prepared according to the literature procedure.<sup>[1]</sup> The unsymmetrical azobenzenes were synthesized according to the literature procedure.<sup>[2]</sup> The other materials and solvents obtained from commercial suppliers were used directly without further purification.

Unless otherwise noted, all photochemical reactions were carried out in Pyrex glass tube with magnetic stirring bar. The LED white lamps employed in this work were bought from Wuhan Jiushang Technology Co. LTD; Power (6 W); The setup of photocatalytic reaction as illustrated in Figure S1. The distance from the light source to the irradiation vessel is about 1.5 cm. The temperature is controlled by a fan. No filter was used in this reaction.

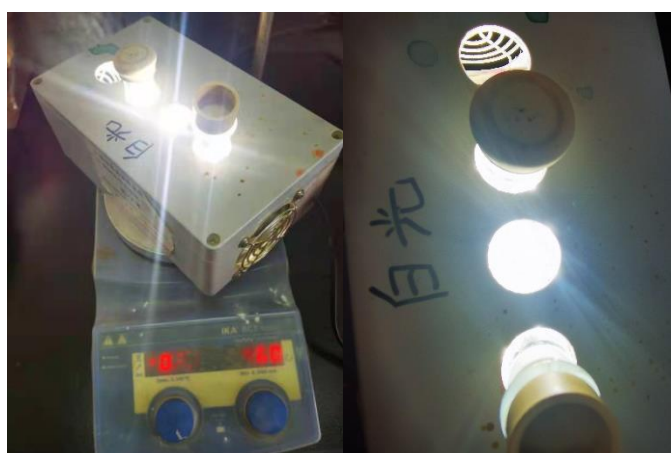

**Figure S1.** Setup of Photocatalytic Reaction and Light Characteristics

## 2. Optimization of Reaction Conditions<sup>a</sup>

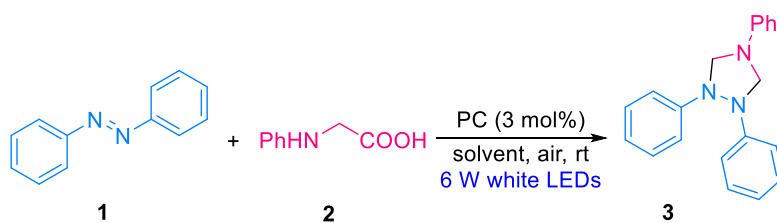

| Entry           | Photocatalyst                                                    | Solvent                         | Yield(%) <sup>b</sup> |
|-----------------|------------------------------------------------------------------|---------------------------------|-----------------------|
| 1               | MB                                                               | CH <sub>3</sub> CN              | 95                    |
| 2               | Rose Bengal                                                      | CH <sub>3</sub> CN              | 48                    |
| 3               | Eosin Y                                                          | CH <sub>3</sub> CN              | 0                     |
| 4               | Mes-Acr <sup>+</sup> ClO <sub>4</sub> <sup>-</sup>               | CH <sub>3</sub> CN              | trace                 |
| 5               | Rhodamine B                                                      | CH <sub>3</sub> CN              | 0                     |
| 6               | Ir[dF(CF <sub>3</sub> )ppy] <sub>2</sub> (dtbbpy)PF <sub>6</sub> | CH <sub>3</sub> CN              | 0                     |
| 7               | MB                                                               | CH <sub>3</sub> OH              | 12                    |
| 8               | MB                                                               | toluene                         | 0                     |
| 9               | MB                                                               | acetone                         | 44                    |
| 10              | MB                                                               | THF                             | 0                     |
| 11              | MB                                                               | DMF                             | trace                 |
| 12              | MB                                                               | dioxane                         | 0                     |
| 13              | MB                                                               | DMSO                            | 0                     |
| 14              | MB                                                               | CH <sub>2</sub> Cl <sub>2</sub> | 84                    |
| 15 <sup>c</sup> | –                                                                | CH <sub>3</sub> CN              | 0                     |
| 16 <sup>d</sup> | MB                                                               | CH <sub>3</sub> CN              | 0                     |
| 17 <sup>e</sup> | MB                                                               | CH <sub>3</sub> CN              | 83                    |
| 18 <sup>f</sup> | MB                                                               | CH <sub>3</sub> CN              | 92                    |
| 19 <sup>g</sup> | MB                                                               | CH <sub>3</sub> CN              | 81                    |
| 20 <sup>h</sup> | MB                                                               | CH <sub>3</sub> CN              | 72                    |

<sup>a</sup>Reaction conditions: A solution of **1** (0.2 mmol), **2** (0.5 mmol, 2.5 equiv.) and MB (3.0 mol%) in CH<sub>3</sub>CN (3.0 mL) is irradiated by 6 W white LEDs at room temperature for 4 h. <sup>b</sup>Isolated yield.

<sup>c</sup>Without photocatalyst. <sup>d</sup>In the dark. <sup>e</sup>**2** (0.4 mmol, 2 equiv.). <sup>f</sup>**2** (0.6 mmol, 3 equiv.). <sup>g</sup>6 W blue LEDs, <sup>h</sup>6 W green LEDs

## 3. General Procedure for the Synthesis of 1,2,4-Triazolidines

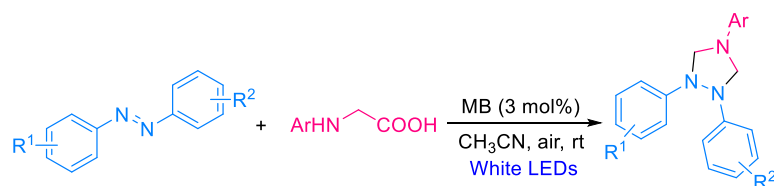

Azobenzenes (0.2 mmol), *N*-aryl glycines (0.5 mmol, 2.5 equiv.), MB (1.9 mg, 0.006 mmol,

3.0 mol%) and CH<sub>3</sub>CN (3 mL) were added into a 10 mL Pyrex glass tube equipped with a magnetic stir bar. Then, the reaction mixture was stirred under irradiation of 6 W white LEDs at room temperature. After azobenzenes were consumed completely (monitored by TLC), the reaction mixture was concentrated under vacuum and the residue was purified by column chromatography on silica gel (PE/EtOAc = 200/1 to 50/1) to afford the desired product.

#### 4. Procedure for the Gram-Scale Synthesis of 3

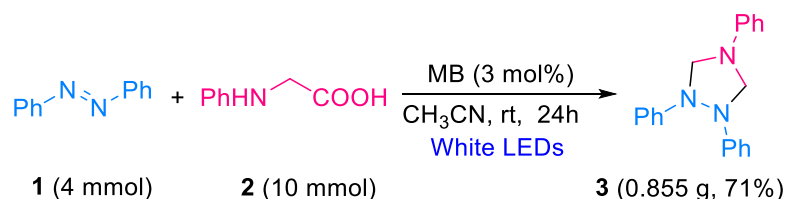

Azobenzene **1** (0.728 g, 4.0 mmol), *N*-phenyl glycine **2** (1.512 g, 10 mmol, 2.5 equiv.), MB (38.4 mg, 0.12 mmol, 3.0 mol%) and CH<sub>3</sub>CN (50.0 mL) were added into a 100 mL round flask equipped with a magnetic stirring bar. The mixture was then irradiated by two 15 W white LEDs and stirred at room temperature for 24 hours. Upon completion (monitored by TLC), the reaction mixture was concentrated under vacuum and the residue was purified by column chromatography (petrol ether/EtOAc = 200:1) to give the desired product **3** (0.855 g, 71%) as a white solid.

#### 5. Unsuccessful Substrates

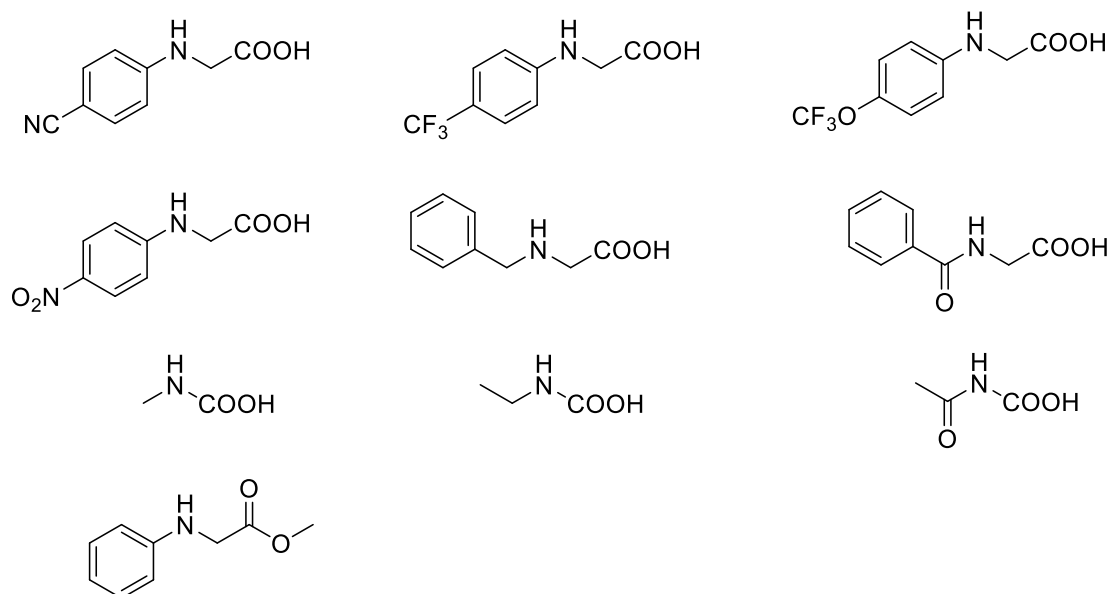

## 6. Crystallographic Structure Determination

The colorless single crystal of product **15** was obtained by recrystallization using a  $\text{CHCl}_3$ /acetone solvent system at room temperature. The X-ray single-crystal diffraction was performed on an Agilent SuperNOVA instrument (**Figure S2**).

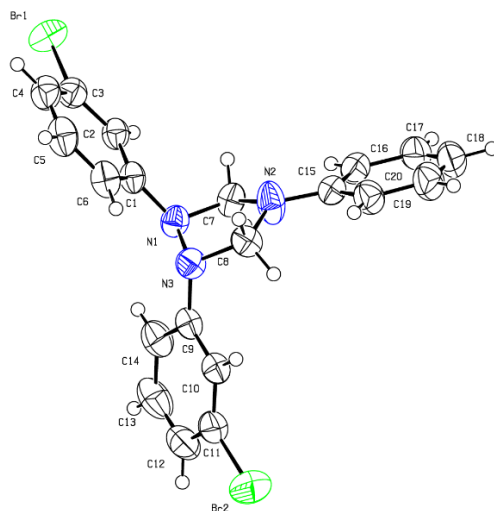

**Figure S2.** Thermal ellipsoid plot of compound **15** at the 30% probability level; hydrogen atoms are drawn as spheres of arbitrary radius.

**Table S1. Crystal data and structure refinement for songmh\_1210.**

|                     |                                                   |
|---------------------|---------------------------------------------------|
| Identification code | songmh_1210                                       |
| Empirical formula   | $\text{C}_{20}\text{H}_{17}\text{Br}_2\text{N}_3$ |
| Formula weight      | 459.18                                            |
| Temperature/K       | 294.65(10)                                        |
| Crystal system      | monoclinic                                        |
| Space group         | $P2_1/n$                                          |
| $a/\text{\AA}$      | 14.62006(16)                                      |
| $b/\text{\AA}$      | 5.80584(6)                                        |
| $c/\text{\AA}$      | 22.6165(2)                                        |
| $\alpha/^\circ$     | 90                                                |
| $\beta/^\circ$      | 104.1994(11)                                      |

|                                               |                                                               |
|-----------------------------------------------|---------------------------------------------------------------|
| $\gamma/^\circ$                               | 90                                                            |
| Volume/ $\text{\AA}^3$                        | 1861.08(4)                                                    |
| Z                                             | 4                                                             |
| $\rho_{\text{calc}}/\text{g/cm}^3$            | 1.639                                                         |
| $\mu/\text{mm}^{-1}$                          | 5.573                                                         |
| F(000)                                        | 912.0                                                         |
| Crystal size/ $\text{mm}^3$                   | $0.11 \times 0.05 \times 0.03$                                |
| Radiation                                     | Cu K $\alpha$ ( $\lambda = 1.54184$ )                         |
| $2\Theta$ range for data collection/ $^\circ$ | 6.542 to 152.118                                              |
| Index ranges                                  | $-17 \leq h \leq 17, -7 \leq k \leq 5, -27 \leq l \leq 26$    |
| Reflections collected                         | 11202                                                         |
| Independent reflections                       | 3576 [ $R_{\text{int}} = 0.0198, R_{\text{sigma}} = 0.0164$ ] |
| Data/restraints/parameters                    | 3576/0/226                                                    |
| Goodness-of-fit on $F^2$                      | 1.037                                                         |
| Final R indexes [ $I \geq 2\sigma(I)$ ]       | $R_1 = 0.0458, wR_2 = 0.1208$                                 |
| Final R indexes [all data]                    | $R_1 = 0.0481, wR_2 = 0.1229$                                 |
| Largest diff. peak/hole / $e \text{\AA}^{-3}$ | 0.68/-0.84                                                    |

---

**Table S2. Fractional Atomic Coordinates ( $\times 10^4$ ) and Equivalent Isotropic Displacement Parameters ( $\text{\AA}^2 \times 10^3$ ) for songmh\_1210.  $U_{\text{eq}}$  is defined as 1/3 of of the trace of the orthogonalised  $U_{\text{ij}}$  tensor.**

| Atom | <i>x</i>   | <i>y</i>   | <i>z</i>   | $U_{\text{eq}}$ |
|------|------------|------------|------------|-----------------|
| Br1  | 3782.3(2)  | 6187.7(7)  | 2078.5(2)  | 64.64(16)       |
| Br2  | -4161.5(3) | 7659.9(13) | -252.8(2)  | 100.5(2)        |
| N1   | 108.1(17)  | 6898(4)    | 1404.2(11) | 45.1(5)         |
| N2   | -618(2)    | 7999(6)    | 2136.6(13) | 65.9(8)         |
| N3   | -702.5(17) | 8209(4)    | 1111.8(11) | 46.3(5)         |
| C1   | 983(2)     | 8008(5)    | 1422.2(12) | 42.0(6)         |
| C2   | 1810(2)    | 6869(5)    | 1710.7(12) | 43.0(6)         |
| C3   | 2668(2)    | 7849(5)    | 1707.5(13) | 46.8(6)         |
| C4   | 2740(2)    | 9943(5)    | 1434.5(14) | 54.5(7)         |
| C5   | 1917(3)    | 11041(5)   | 1147.2(15) | 58.0(8)         |
| C6   | 1037(2)    | 10110(5)   | 1132.0(14) | 52.0(7)         |
| C7   | -63(2)     | 6149(5)    | 1981.0(14) | 46.2(6)         |
| C8   | -1015(2)   | 9366(5)    | 1604.2(13) | 46.7(6)         |
| C9   | -1374(2)   | 6903(5)    | 680.8(12)  | 44.8(6)         |
| C10  | -2283(2)   | 7736(6)    | 463.4(13)  | 49.5(7)         |
| C11  | -2930(3)   | 6473(7)    | 34.4(14)   | 60.3(8)         |
| C12  | -2697(3)   | 4432(7)    | -191.8(15) | 68.9(10)        |
| C13  | -1788(4)   | 3647(6)    | 10.9(17)   | 73.1(11)        |
| C14  | -1119(3)   | 4856(6)    | 444.8(15)  | 59.0(8)         |
| C15  | -1004(2)   | 7909(6)    | 2642.5(13) | 48.1(6)         |
| C16  | -780(2)    | 6098(6)    | 3056.6(14) | 53.0(7)         |
| C17  | -1132(3)   | 6092(7)    | 3575.4(15) | 62.3(9)         |
| C18  | -1688(3)   | 7868(7)    | 3682.3(16) | 68.8(10)        |
| C19  | -1911(3)   | 9632(7)    | 3273.1(17) | 68.7(9)         |
| C20  | -1581(2)   | 9683(6)    | 2750.0(15) | 56.9(7)         |

**Table S3. Anisotropic Displacement Parameters ( $\text{\AA}^2 \times 10^3$ ) for songmh\_1210. The Anisotropic displacement factor exponent takes the form:  $-2\pi^2[h^2a^2U_{11}+2hka*b*U_{12}+\dots]$ .**

| Atom | $U_{11}$ | $U_{22}$ | $U_{33}$ | $U_{23}$  | $U_{13}$ | $U_{12}$  |
|------|----------|----------|----------|-----------|----------|-----------|
| Br1  | 44.9(2)  | 62.2(3)  | 81.9(3)  | 0.60(17)  | 6.16(16) | -5.34(14) |
| Br2  | 56.0(3)  | 155.5(6) | 80.7(3)  | 1.7(3)    | -0.8(2)  | -4.5(3)   |
| N1   | 43.3(12) | 43.6(12) | 50.6(12) | 5.6(10)   | 15.7(10) | 7.7(10)   |
| N2   | 75.0(19) | 74.0(18) | 58.5(15) | 23.6(14)  | 35.2(14) | 36.0(16)  |
| N3   | 46.6(13) | 44.5(12) | 48.0(12) | -1.2(10)  | 11.8(10) | 9.3(10)   |
| C1   | 49.3(15) | 37.7(13) | 43.5(13) | -1.7(10)  | 20.2(11) | 2.5(11)   |
| C2   | 49.2(15) | 38.2(13) | 45.1(14) | -0.9(11)  | 18.2(11) | -0.9(11)  |
| C3   | 50.4(16) | 43.6(14) | 48.3(14) | -8.0(12)  | 15.6(12) | -3.2(12)  |
| C4   | 62.4(19) | 48.1(16) | 58.6(17) | -6.2(13)  | 25.4(14) | -11.8(14) |
| C5   | 80(2)    | 39.9(15) | 62.3(18) | 4.4(13)   | 33.6(17) | -1.9(14)  |
| C6   | 65.9(19) | 43.0(15) | 52.3(15) | 6.8(12)   | 24.6(14) | 9.7(14)   |
| C7   | 46.7(15) | 39.2(14) | 56.8(16) | 8.6(11)   | 20.7(12) | 4.5(11)   |
| C8   | 52.7(16) | 38.5(13) | 48.1(14) | -2.5(11)  | 11.0(12) | 10.0(12)  |
| C9   | 54.7(16) | 43.9(14) | 38.8(13) | 1.6(11)   | 17.4(11) | 0.6(12)   |
| C10  | 52.1(16) | 56.4(17) | 41.5(14) | 1.3(12)   | 14.5(12) | 0.0(13)   |
| C11  | 60.3(19) | 79(2)    | 43.6(15) | 3.4(15)   | 16.5(14) | -12.3(17) |
| C12  | 89(3)    | 75(2)    | 43.8(16) | -6.8(16)  | 18.9(16) | -27(2)    |
| C13  | 116(4)   | 55(2)    | 54.6(19) | -13.4(15) | 32(2)    | -7(2)     |
| C14  | 75(2)    | 53.0(18) | 51.7(16) | -3.3(14)  | 21.7(15) | 10.0(16)  |
| C15  | 39.8(14) | 59.5(17) | 46.0(14) | -0.5(12)  | 12.2(11) | 0.7(13)   |
| C16  | 41.6(15) | 65.0(19) | 53.8(16) | 3.3(14)   | 14.3(12) | 1.3(13)   |
| C17  | 64(2)    | 75(2)    | 49.9(17) | 3.7(15)   | 17.7(15) | -13.2(17) |
| C18  | 76(2)    | 84(3)    | 54.3(18) | -15.8(18) | 30.5(17) | -19(2)    |
| C19  | 74(2)    | 72(2)    | 68(2)    | -19.5(18) | 32.2(18) | -1.0(19)  |
| C20  | 61.4(19) | 58.5(18) | 53.4(16) | -5.8(14)  | 19.2(14) | 4.4(15)   |



**Table S4. Bond Lengths for songmh\_1210.**

| Atom | Atom | Length/Å | Atom | Atom | Length/Å |
|------|------|----------|------|------|----------|
| Br1  | C3   | 1.902(3) | C4   | C5   | 1.376(5) |
| Br2  | C11  | 1.888(4) | C5   | C6   | 1.388(5) |
| N1   | N3   | 1.427(3) | C9   | C10  | 1.385(4) |
| N1   | C1   | 1.424(4) | C9   | C14  | 1.391(4) |
| N1   | C7   | 1.454(4) | C10  | C11  | 1.387(5) |
| N2   | C7   | 1.441(4) | C11  | C12  | 1.367(6) |
| N2   | C8   | 1.440(4) | C12  | C13  | 1.373(6) |
| N2   | C15  | 1.396(4) | C13  | C14  | 1.393(6) |
| N3   | C8   | 1.466(4) | C15  | C16  | 1.392(4) |
| N3   | C9   | 1.421(4) | C15  | C20  | 1.390(5) |
| C1   | C2   | 1.392(4) | C16  | C17  | 1.392(4) |
| C1   | C6   | 1.397(4) | C17  | C18  | 1.371(6) |
| C2   | C3   | 1.379(4) | C18  | C19  | 1.365(6) |
| N3   | C9   | 1.421(4) | C15  | C20  | 1.390(5) |
| C1   | C2   | 1.392(4) | C16  | C17  | 1.392(4) |
| C1   | C6   | 1.397(4) | C17  | C18  | 1.371(6) |
| C2   | C3   | 1.379(4) | C18  | C19  | 1.365(6) |
| C3   | C4   | 1.380(4) | C19  | C20  | 1.383(5) |

**Table S5. Bond Angles for songmh\_1210.**

| Atom | Atom | Atom | Angle/°  | Atom | Atom | Atom |
|------|------|------|----------|------|------|------|
| N3   | N1   | C7   | 105.6(2) | N2   | C8   | N3   |
| C1   | N1   | N3   | 114.2(2) | C10  | C9   | N3   |
| C1   | N1   | C7   | 117.5(2) | C10  | C9   | C14  |
| C8   | N2   | C7   | 110.0(2) | C14  | C9   | N3   |
| C15  | N2   | C7   | 122.5(3) | C9   | C10  | C11  |
| C15  | N2   | C8   | 123.0(3) | C10  | C11  | Br2  |
| N1   | N3   | C8   | 105.7(2) | C12  | C11  | Br2  |
| C9   | N3   | N1   | 112.9(2) | C12  | C11  | C10  |
| C9   | N3   | C8   | 118.3(2) | C11  | C12  | C13  |
| C2   | C1   | N1   | 118.0(2) | C12  | C13  | C14  |
| C2   | C1   | C6   | 119.5(3) | C9   | C14  | C13  |
| C6   | C1   | N1   | 122.4(3) | C16  | C15  | N2   |
| C3   | C2   | C1   | 119.2(3) | C20  | C15  | N2   |
| C2   | C3   | Br1  | 118.0(2) | C20  | C15  | C16  |
| C2   | C3   | C4   | 122.4(3) | C17  | C16  | C15  |
| C4   | C3   | Br1  | 119.5(2) | C18  | C17  | C16  |
| C5   | C4   | C3   | 117.7(3) | C19  | C18  | C17  |
| C4   | C5   | C6   | 122.0(3) | C18  | C19  | C20  |
| C5   | C6   | C1   | 119.2(3) | C19  | C20  | C15  |
| N2   | C7   | N1   | 103.1(2) |      |      |      |

**Table S6. Hydrogen Atom Coordinates ( $\text{\AA}\times 10^4$ ) and Isotropic Displacement Parameters ( $\text{\AA}^2\times 10^3$ ) for songmh\_1210.**

| Atom | <i>x</i> | <i>y</i> | <i>z</i> | U(eq) |
|------|----------|----------|----------|-------|
| H2   | 1783.81  | 5463.2   | 1903.25  | 52    |
| H4   | 3325.77  | 10591.14 | 1444.26  | 65    |
| H5   | 1951.25  | 12449.19 | 957.62   | 70    |
| H6   | 490.24   | 10876.13 | 931.06   | 62    |
| H7A  | -408.82  | 4707.31  | 1934.4   | 55    |
| H7B  | 524.26   | 5961.27  | 2288.85  | 55    |
| H8A  | -780.05  | 10934.63 | 1656.86  | 56    |
| H8B  | -1697.83 | 9394.11  | 1520.56  | 56    |
| H10  | -2457.3  | 9133.71  | 604.32   | 59    |
| H12  | -3142.21 | 3597.08  | -475.4   | 83    |
| H13  | -1615.24 | 2276.73  | -144.9   | 88    |
| H14  | -506.67  | 4297.63  | 575.62   | 71    |
| H16  | -397.97  | 4899.61  | 2986.82  | 64    |
| H17  | -988.64  | 4877.83  | 3850.8   | 75    |
| H18  | -1913.34 | 7871.32  | 4032.86  | 83    |
| H19  | -2292.89 | 10824.65 | 3347.48  | 82    |
| H20  | -1743.36 | 10888.78 | 2473.48  | 68    |

## 7. Mechanistic Studies

### 7.1 UV-Vis Absorption Spectra

The UV-visible absorption spectra of azobenzene **1**, *N*-phenyl glycine **2**, methylene blue (MB) in acetonitrile show that **1** especially MB has significant absorption in the visible-light region, while **2** has no obvious absorption in the visible-light region (Figure S3).

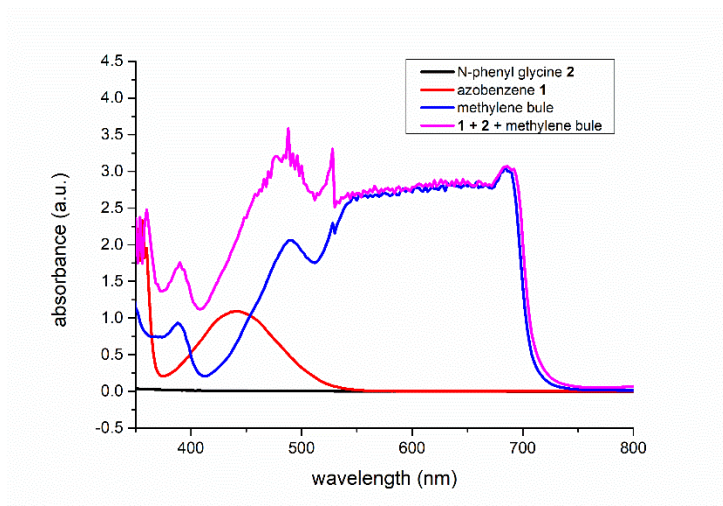

**Figure S3.** The UV-Vis absorption spectra in CH<sub>3</sub>CN (2 mM)

### 7.2 Stern-Volmer Quenching Experiments

Stern-Volmer luminescence quenching experiments were run with freshly prepared solutions of  $1.0 \times 10^{-4}$  M MB and the appropriate amount of quencher in CH<sub>3</sub>CN at room temperature. The solutions were irradiated at 425 nm and luminescence was measured at 702 nm. Then, appropriate amount of quencher was added to the measured solution, the emission spectrum of the sample was collected (Figures S4–S6).

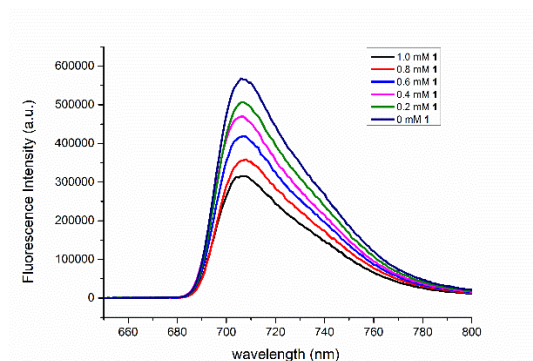

**Figure S4.** Fluorescence quenching of MB with **1** ( $\lambda_{\text{ex}} = 425$  nm)

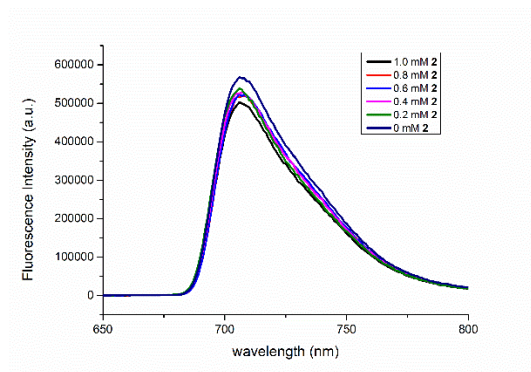

**Figure S5.** Fluorescence quenching of MB with **2** ( $\lambda_{\text{ex}} = 425 \text{ nm}$ )

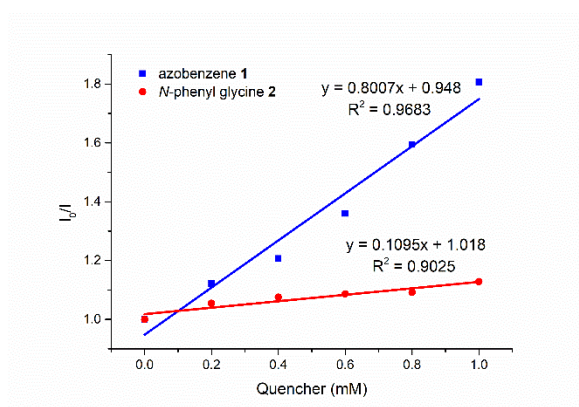

**Figure S6.** Stern-Volmer analysis

### 7.3 Radical Inhibiting Experiment with TEMPO

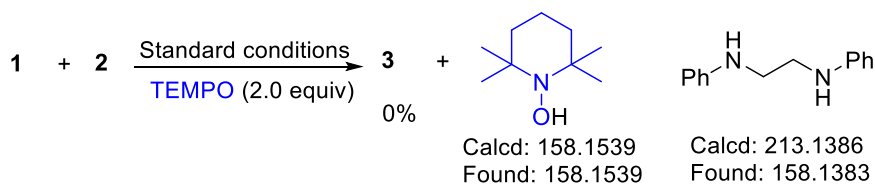

Azobenzene **1** (36.4 mg, 0.2 mmol), *N*-phenyl glycine **2** (75.6 mg, 0.5 mmol, 2.5equiv.), MB (1.9 mg, 0.006 mmol, 3.0 mol%), TEMPO (62.5 mg, 0.4 mmol, 2 equiv.) and CH<sub>3</sub>CN (3 mL) were added into a 10 mL Pyrex glass tube. The reaction mixture was continually stirred at room temperature under 6 W white LEDs irradiation for 4 hours. There, **3** was not detected by TLC and the reduced TEMPO-H and a dimerization product *N,N'*-diphenylethane-1,2-diamine were detected by HRMS (Figures S7–S8, data of  $[M+H]^+$  are showed).

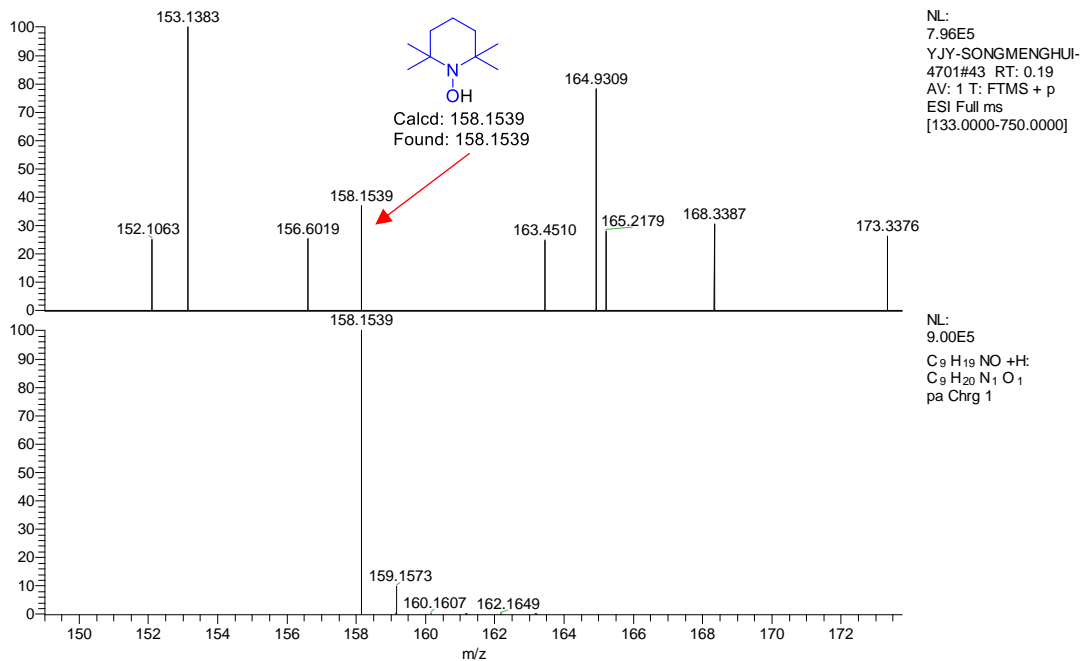

Figure S7

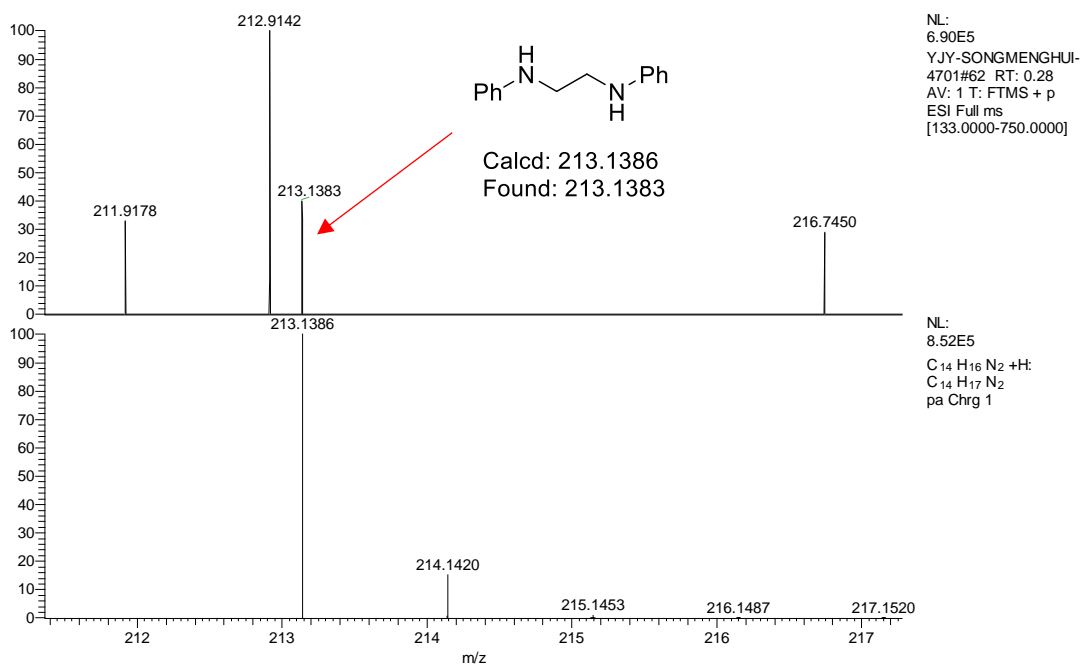

Figure S8

## 7.4 Detecting the Reaction Mixture by HRMS

Azobenzene **1** (36.4 mg, 0.2 mmol), *N*-phenyl glycine **2** (75.6 mg, 0.5 mmol, 2.5equiv.), MB (1.9 mg, 0.006 mmol, 3.0 mol%) and CH<sub>3</sub>CN (3 mL) were added into a 10 mL Pyrex glass tube. The reaction mixture was continually stirred at room temperature under 6 W white LEDs irradiation for 1.5 hours. And then, without any treatment, the reaction mixture was detected by HRMS (Figures S9–S11, data of [M+H]<sup>+</sup> are showed).

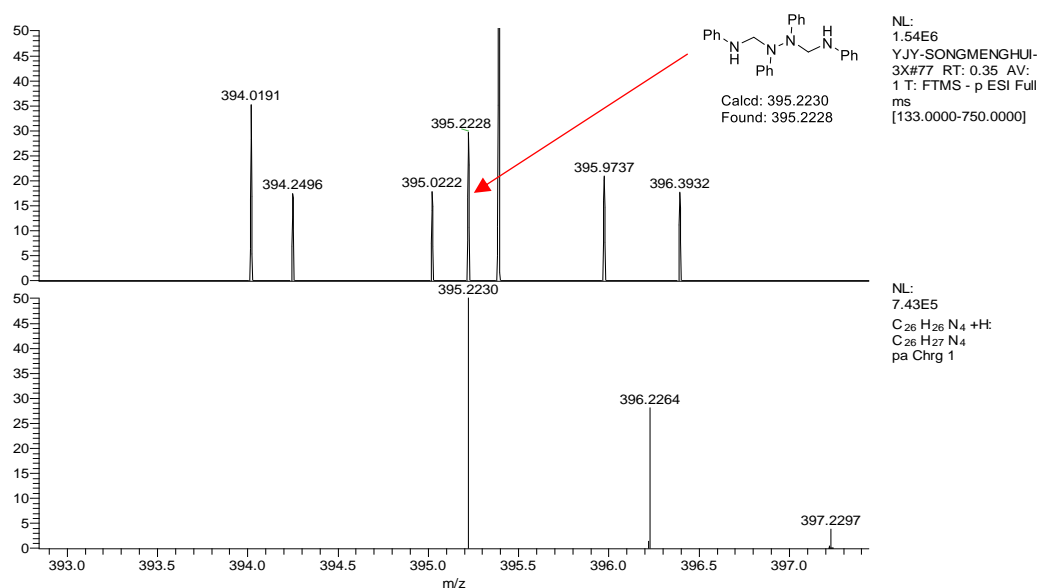

Figure S9

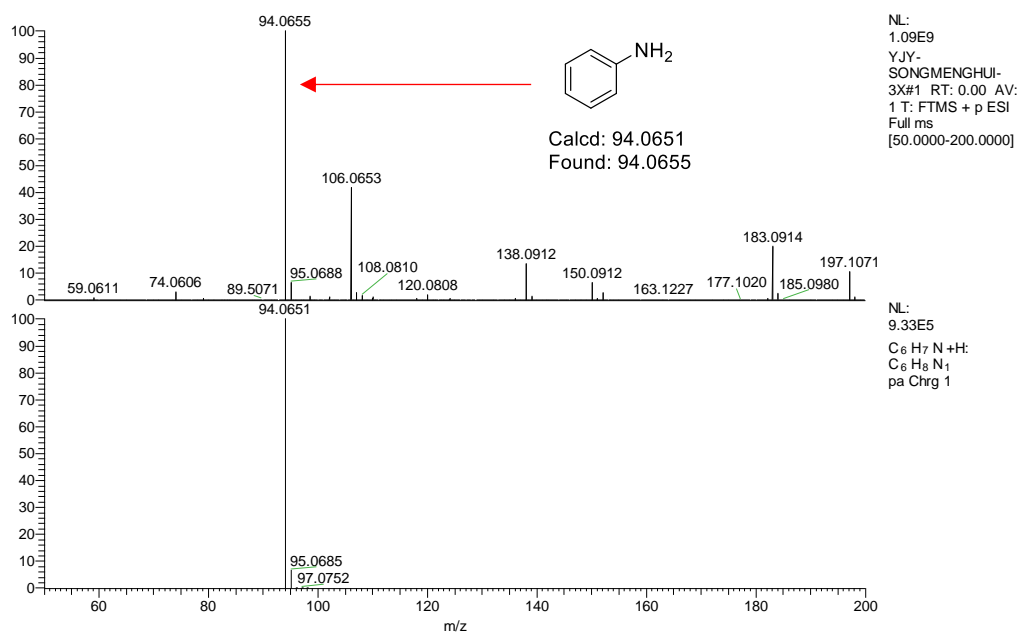

Figure S10

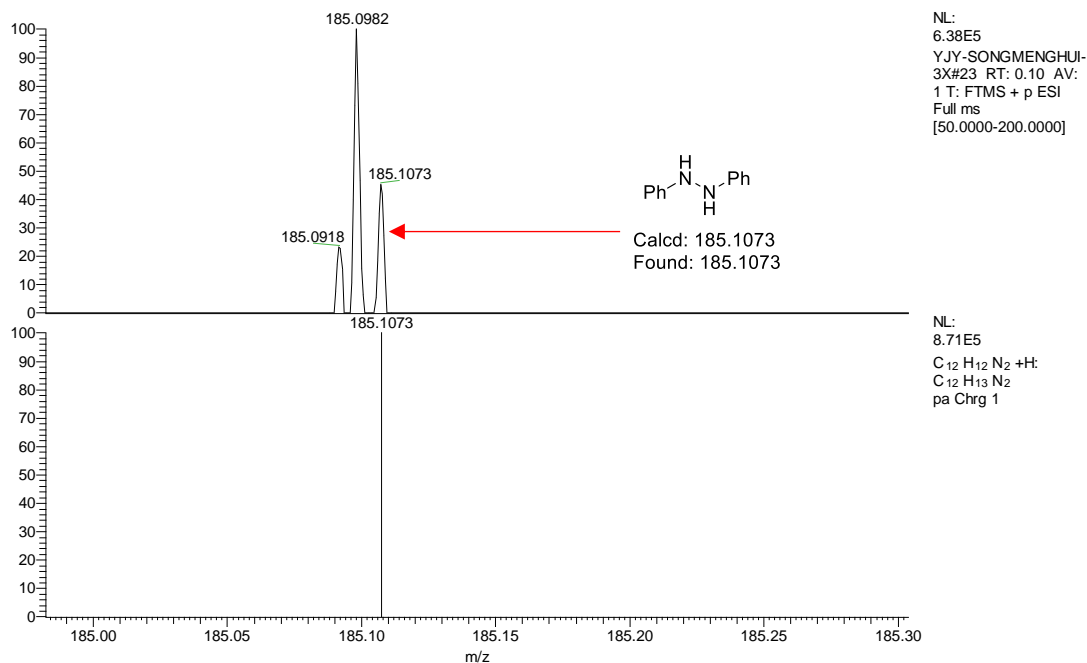

Figure S11

## 8. Characterization Data of Products

### 1) 1,2,4-Triphenyl-1,2,4-triazolidine (3)<sup>[3]</sup>

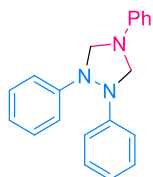

Prepared according to the general procedure from azobenzene (36.4 mg, 0.2 mmol) and *N*-phenyl glycine (75.6 mg, 0.5 mmol, 2.5 equiv.). Purified by column chromatography on silica gel (PE : EtOAc = 200:1) to afford the pure product **3**.

White solid, m.p. 140–141 °C; yield: 57.2 mg (95%).

<sup>1</sup>H NMR (400 MHz, CDCl<sub>3</sub>): δ 7.33–7.28 (m, 4H), 7.27–7.19 (m, 6H), 6.98 (t, *J* = 7.4 Hz, 2H), 6.80 (t, *J* = 7.4 Hz, 1H), 6.61 (d, *J* = 8.0 Hz, 2H), 4.89 (s, 2H), 4.71 (s, 2H).

<sup>13</sup>C NMR (150 MHz, CDCl<sub>3</sub>): δ 150.2, 145.2, 129.4, 129.2, 121.6, 118.4, 115.0, 113.3, 67.1.

HRMS (ESI): *m/z* [M+H]<sup>+</sup> calcd for C<sub>20</sub>H<sub>20</sub>N<sub>3</sub><sup>+</sup>: 302.1652; found: 302.1651.

### 2) 4-Phenyl-1,2-di-*p*-tolyl-1,2,4-triazolidine (4)



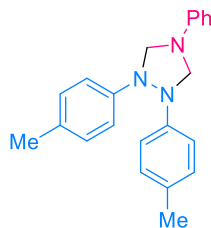

Prepared according to the general procedure from (*E*)-1,2-di-*p*-tolylidiazene (42.0 mg, 0.2 mmol) and *N*-phenyl glycine (75.6 mg, 0.5 mmol, 2.5 equiv.). Purified by column chromatography on silica gel (PE : EtOAc = 200:1) to afford the pure product **4**.

White solid, m.p. 134–136 °C; yield: 61.3 mg (93%).

<sup>1</sup>H NMR (400 MHz, CDCl<sub>3</sub>): δ 7.27–7.20 (m, 2H), 7.10–7.08 (m, 8H), 6.76 (t, *J* = 7.2 Hz, 1H), 6.57 (d, *J* = 7.6 Hz, 2H), 4.82 (s, 2H), 4.65 (s, 2H), 2.28 (s, 6H).

<sup>13</sup>C NMR (150 MHz, CDCl<sub>3</sub>): δ 148.0, 145.3, 130.9, 129.7, 129.3, 118.2, 115.2, 113.2, 67.2, 20.4.

HRMS (ESI): *m/z* [M+H]<sup>+</sup> calcd for C<sub>22</sub>H<sub>24</sub>N<sub>3</sub><sup>+</sup>: 330.1965; found: 330.1965.

### 3) 1,2-Bis(4-butylphenyl)-4-phenyl-1,2,4-triazolidine (5)

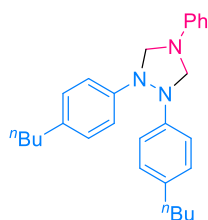

Prepared according to the general procedure from (*E*)-1,2-bis(4-butylphenyl)diazene (58.9 mg, 0.2 mmol) and *N*-phenyl glycine (75.6 mg, 0.5 mmol, 2.5 equiv.). Purified by column chromatography on silica gel (PE : EtOAc = 200:1) to afford the pure product **5**.

White solid, m.p. 104–105 °C; yield: 76.1 mg (92%).

<sup>1</sup>H NMR (400 MHz, CDCl<sub>3</sub>): δ 7.26–7.20 (m, 2H), 7.15–7.07 (m, 8H), 6.78–6.74 (m, 1H), 6.61–6.54 (m, 2H), 4.84 (s, 2H), 4.66 (s, 2H), 2.54 (t, *J* = 7.8 Hz, 4H), 1.60–1.52 (m, 4H), 1.39–1.30 (m, 4H), 0.92 (t, *J* = 7.2 Hz, 6H).

<sup>13</sup>C NMR (150 MHz, CDCl<sub>3</sub>): δ 148.1, 145.1, 136.0, 129.3, 129.0, 118.1, 115.0, 113.1, 67.1, 34.8, 33.8, 22.3, 13.9.

HRMS (ESI): *m/z* [M+H]<sup>+</sup> calcd for C<sub>28</sub>H<sub>36</sub>N<sub>3</sub><sup>+</sup>: 414.2904; found: 414.2907.

### 4) 1,2-Bis(4-(*tert*-butyl)phenyl)-4-phenyl-1,2,4-triazolidine (6)

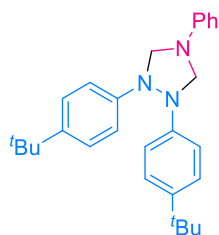

Prepared according to the general procedure from (*E*)-1,2-bis(4-(*tert*-butyl)phenyl)diazene (58.9 mg, 0.2 mmol) and *N*-phenyl glycine (75.6 mg, 0.5 mmol, 2.5 equiv.). Purified by column chromatography on silica gel (PE : EtOAc = 200:1) to afford the pure product **6**.

White solid, m.p. 158–160 °C; yield: 73.6 mg (89%).

<sup>1</sup>H NMR (400 MHz, CDCl<sub>3</sub>): δ 7.32–7.29 (m, 4H), 7.25–7.20 (m, 2H), 7.16–7.12 (m, 4H), 8.79–6.74 (m, 1H), 6.59–6.54 (m, 2H), 4.86 (s, 2H), 4.67 (s, 2H), 1.30 (s, 18H).

<sup>13</sup>C NMR (150 MHz, CDCl<sub>3</sub>): δ 147.8, 145.1, 144.3, 129.3, 125.9, 118.0, 114.7, 113.0, 67.0, 34.1, 31.5.

HRMS (ESI): *m/z* [M+H]<sup>+</sup> calcd for C<sub>28</sub>H<sub>36</sub>N<sub>3</sub><sup>+</sup>: 414.2904; found: 414.2906.

#### 5) 1,2-Bis(4-fluorophenyl)-4-phenyl-1,2,4-triazolidine (7)

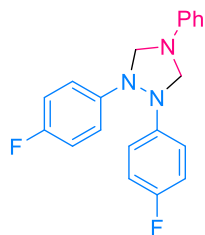

Prepared according to the general procedure from (*E*)-1,2-bis(4-fluorophenyl)diazene (43.6 mg, 0.2 mmol) and *N*-phenyl glycine (75.6 mg, 0.5 mmol, 2.5 equiv.). Purified by column chromatography on silica gel (PE : EtOAc = 200:1) to afford the pure product **7**.

White solid, m.p. 125–126 °C; yield: 60.0 mg (89%).

<sup>1</sup>H NMR (400 MHz, CDCl<sub>3</sub>): δ 7.28–7.22 (m, 2H), 7.15–7.11 (m, 4H), 7.06–6.94 (m, 4H), 6.81 (t, *J* = 7.2 Hz, 1H), 6.64–6.56 (m, 2H), 4.77 (s, 2H), 4.70 (s, 2H).

<sup>13</sup>C NMR (150 MHz, CDCl<sub>3</sub>): δ 159.2 (d, *J* = 238.5 Hz), 146.4 (d, *J* = 1.5 Hz), 145.1, 129.4, 118.8, 116.6 (d, *J* = 7.5 Hz), 115.7 (d, *J* = 22.5 Hz), 113.5, 67.8.

<sup>19</sup>F NMR (376 MHz, CDCl<sub>3</sub>): δ -123.2 – -123.3.

HRMS (ESI): *m/z* [M+H]<sup>+</sup> calcd for C<sub>20</sub>H<sub>18</sub>F<sub>2</sub>N<sub>3</sub><sup>+</sup>: 338.1463; found: 338.1464.

#### 6) 1,2-Bis(4-chlorophenyl)-4-phenyl-1,2,4-triazolidine (8)

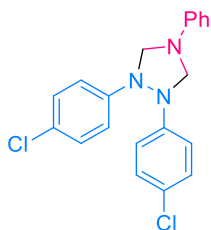

Prepared according to the general procedure from (*E*)-1,2-bis(4-chlorophenyl)diazene (50.2 mg, 0.2 mmol) and *N*-phenyl glycine (75.6 mg, 0.5 mmol, 2.5 equiv.). Purified by column chromatography on silica gel (PE : EtOAc = 200:1) to afford the pure product **8**.

White solid, m.p. 155–156 °C; yield: 64.4 mg (87%).

<sup>1</sup>H NMR (400 MHz, CDCl<sub>3</sub>): δ 7.29–7.21 (m, 6H), 7.11–7.05 (m, 4H), 6.82 (t, *J* = 7.4 Hz, 1H), 6.64–6.55 (m, 2H), 4.79 (s, 2H), 4.68 (s, 2H).

<sup>13</sup>C NMR (150 MHz, CDCl<sub>3</sub>): δ 148.5, 144.8, 129.4, 129.1, 126.7, 118.9, 116.3, 113.5, 67.4.

HRMS (ESI): *m/z* [M+H]<sup>+</sup> calcd for C<sub>20</sub>H<sub>18</sub>Cl<sub>2</sub>N<sub>3</sub><sup>+</sup>: 370.0872; found: 370.0876.

#### 7) 1,2-Bis(4-bromophenyl)-4-phenyl-1,2,4-triazolidine (**9**)

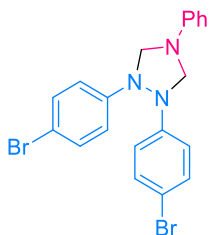

Prepared according to the general procedure from (*E*)-1,2-bis(4-bromophenyl)diazene (68.0 mg, 0.2 mmol) and *N*-phenyl glycine (75.6 mg, 0.5 mmol, 2.5 equiv.). Purified by column chromatography on silica gel (PE : EtOAc = 200:1) to afford the pure product **9**.

White solid, m.p. 160–161 °C; yield: 80.8 mg (88%).

<sup>1</sup>H NMR (400 MHz, CDCl<sub>3</sub>): δ 7.41–7.38 (m, 4H), 7.29–7.24 (m, 2H), 7.05–7.02 (m, 4H), 6.86–6.20 (m, 1H), 6.62–6.60 (m, 2H), 4.79 (s, 2H), 4.68 (s, 2H).

<sup>13</sup>C NMR (150 MHz, CDCl<sub>3</sub>): δ 148.9, 144.8, 132.0, 129.4, 118.9, 116.7, 114.1, 113.5, 67.2.

HRMS (ESI): *m/z* [M+H]<sup>+</sup> calcd for C<sub>20</sub>H<sub>18</sub>Br<sub>2</sub>N<sub>3</sub><sup>+</sup>: 459.9842; found: 459.9843.

#### 8) 4-Phenyl-1,2-bis(4-(trifluoromethyl)phenyl)-1,2,4-triazolidine (**10**)

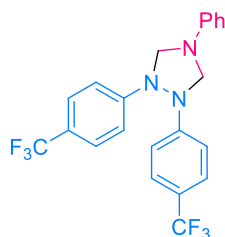

Prepared according to the general procedure from (*E*)-1,2-bis(4-(trifluoromethyl)phenyl)diazene (63.6 mg, 0.2 mmol) and *N*-phenyl glycine (75.6 mg, 0.5 mmol, 2.5 equiv.). Purified by column chromatography on silica gel (PE : EtOAc = 100:1) to afford the pure product **10**.

White solid, m.p. 82–83C °C; yield: 66.5 mg (76%).

<sup>1</sup>H NMR (400 MHz, CDCl<sub>3</sub>): δ 7.57–7.54 (m, 4H), 7.30–7.26 (m, 2H), 7.19 (d, *J* = 8.8 Hz, 4H), 6.85 (t, *J* = 7.4 Hz, 1H), 6.66–6.63 (m, 2H), 4.91 (s, 2H), 4.76 (s, 2H).

<sup>13</sup>C NMR (150 MHz, CDCl<sub>3</sub>): δ 152.2, 144.7, 129.5, 126.6 (q, *J* = 4.5 Hz), 124.6 (d, *J* = 190.5 Hz), 123.6 (d, *J* = 48.0 Hz) 119.4, 114.5, 113.7, 67.1.

<sup>19</sup>F NMR (376 MHz, CDCl<sub>3</sub>): δ = -62.0.

HRMS (ESI): *m/z* [M+H]<sup>+</sup> calcd for C<sub>22</sub>H<sub>18</sub>F<sub>6</sub>N<sub>3</sub><sup>+</sup>: 438.1399; found: 438.1399.

#### 9) 4-Phenyl-1,2-bis(4-(trifluoromethoxy)phenyl)-1,2,4-triazolidine (11)

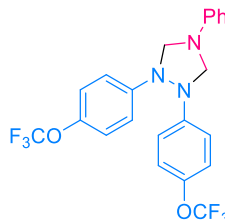

Prepared according to the general procedure from (*E*)-1,2-bis(4-(trifluoromethoxy)phenyl)diazene (70.0 mg, 0.2 mmol) and *N*-phenyl glycine (75.6 mg, 0.5 mmol, 2.5 equiv.). Purified by column chromatography on silica gel (PE : EtOAc = 100:1) to afford the pure product **11**.

Colorless oil; yield: 80.7 mg (86%).

<sup>1</sup>H NMR (400 MHz, CDCl<sub>3</sub>): δ 7.30–7.25 (m, 2H), 7.14–7.20 (m, 8H), 6.84 (t, *J* = 7.4 Hz, 1H), 6.63 (d, *J* = 8.0 Hz, 2H), 4.83 (s, 2H), 4.73 (s, 2H).

<sup>13</sup>C NMR (150 MHz, CDCl<sub>3</sub>): δ 148.6, 144.8, 143.8 (d, *J* = 1.5 Hz), 129.5, 122.2, 121.4 (d, *J* = 255.0 Hz), 119.0, 115.9, 113.5, 67.6.

<sup>19</sup>F NMR (376 MHz, CDCl<sub>3</sub>): δ = -58.7.

HRMS (ESI): *m/z* [M+H]<sup>+</sup> calcd for C<sub>22</sub>H<sub>18</sub>F<sub>6</sub>O<sub>2</sub>N<sub>3</sub><sup>+</sup>: 470.1298; found: 470.1299.

#### 10) 4-Phenyl-1,2-di-*m*-tolyl-1,2,4-triazolidine (12)

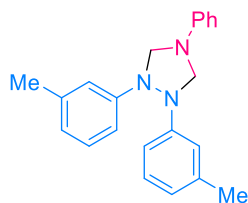

Prepared according to the general procedure from (*E*)-1,2-di-*m*-tolylidiazene (42.0 mg, 0.2 mmol) and *N*-phenyl glycine (75.6 mg, 0.5 mmol, 2.5 equiv.). Purified by column chromatography on silica gel (PE : EtOAc = 200:1) to afford the pure product **12**.

White solid, m.p. 58–59 °C; yield: 56.2 mg (85%).

<sup>1</sup>H NMR (400 MHz, CDCl<sub>3</sub>): δ 7.29–7.19 (m, 4H), 7.06–7.00 (m, 4H), 6.83–6.78 (m, 3H), 6.65–6.60 (m, 2H), 4.90 (s, 2H), 4.70 (s, 2H), 2.37 (s, 6H).

<sup>13</sup>C NMR (100 MHz, CDCl<sub>3</sub>): δ 150.2, 145.1, 139.0, 129.3, 129.0, 122.3, 118.2, 115.5, 113.1, 112.0, 67.0, 21.7.

HRMS (ESI): *m/z* [M+H]<sup>+</sup> calcd for C<sub>22</sub>H<sub>24</sub>N<sub>3</sub><sup>+</sup>: 330.1965; found: 330.1964.

#### 11) 1,2-Bis(3-fluorophenyl)-4-phenyl-1,2,4-triazolidine (13)

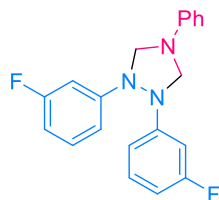

Prepared according to the general procedure from (*E*)-1,2-bis(3-fluorophenyl)diazene (43.6 mg, 0.2 mmol) and *N*-phenyl glycine (75.6 mg, 0.5 mmol, 2.5 equiv.). Purified by column chromatography on silica gel (PE: EtOAc = 200:1) to afford the pure product **13**.

White solid, m.p. 106–107 °C; yield: 56.0 mg (83%).

<sup>1</sup>H NMR (400 MHz, CDCl<sub>3</sub>): δ 7.28–7.23 (m, 4H), 6.94–6.87 (m, 4H), 6.84–6.80 (m, 1H), 6.70–6.64 (m, 2H), 6.63–6.59 (m, 2H), 4.83 (s, 2H), 4.69 (s, 2H).

<sup>13</sup>C NMR (150 MHz, CDCl<sub>3</sub>): δ 164.6 (d, *J* = 244.5 Hz), 151.9 (d, *J* = 9.0 Hz), 144.8, 130.5 (d, *J* = 9.0 Hz), 129.4, 118.9, 113.5, 110.5 (d, *J* = 1.5 Hz), 108.5 (d, *J* = 6.0 Hz), 102.5 (d, *J* = 27.0 Hz), 67.3.

<sup>19</sup>F NMR (376 MHz, CDCl<sub>3</sub>): δ = -112.26– -112.33.

HRMS (ESI): *m/z* [M+H]<sup>+</sup> calcd for C<sub>20</sub>H<sub>18</sub>F<sub>2</sub>N<sub>3</sub><sup>+</sup>: 338.1463; found: 338.1467.

## 12) 1,2-Bis(3-chlorophenyl)-4-phenyl-1,2,4-triazolidine (14)

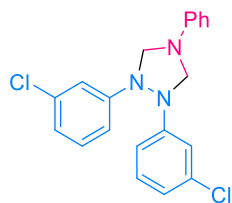

Prepared according to the general procedure from (*E*)-1,2-bis(3-chlorophenyl)diazene (50.2mg, 0.2 mmol) and *N*-phenyl glycine (75.6 mg, 0.5 mmol, 2.5 equiv.). Purified by column chromatography on silica gel (PE: EtOAc = 200:1) to afford the pure product **14**.

White solid, m.p. 90–92 °C; yield: 62.2 mg (84%).

<sup>1</sup>H NMR (400 MHz, CDCl<sub>3</sub>): δ 7.29–7.20 (m, 6H), 7.03–6.94 (m, 4H), 6.84 (t, *J* = 7.2 Hz, 1H), 6.61 (d, *J* = 8.0 Hz, 2H), 4.82 (s, 2H), 4.69 (s, 2H)

<sup>13</sup>C NMR (150 MHz, CDCl<sub>3</sub>): δ 151.1, 144.7, 135.1, 130.2, 129.4, 121.8, 119.0, 115.1, 113.5, 113.2, 67.3.

HRMS (ESI): *m/z* [M+H]<sup>+</sup> calcd for C<sub>20</sub>H<sub>18</sub>Cl<sub>2</sub>N<sub>3</sub><sup>+</sup>: 370.0872; found: 370.0870.

## 13) 1,2-Bis(3-bromophenyl)-4-phenyl-1,2,4-triazolidine (15)

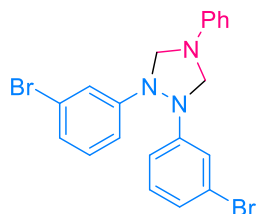

Prepared according to the general procedure from (*E*)-1,2-bis(3-bromophenyl)diazene (68.0 mg, 0.2 mmol) and *N*-phenyl glycine (75.6 mg, 0.5 mmol, 2.5 equiv.). Purified by column chromatography on silica gel (PE: EtOAc = 200:1) to afford the pure product **15**.

White solid, m.p. 135–136 °C; yield: 74.4 mg (81%).

<sup>1</sup>H NMR (400 MHz, CDCl<sub>3</sub>): δ 7.37–7.35 (m, 2H), 7.29–7.24 (m, 2H), 7.19–7.10 (m, 4H), 7.08–7.03 (m, 2H), 6.84 (t, *J* = 7.2 Hz, 1H), 6.61 (d, *J* = 8.0 Hz, 2H), 4.80 (s, 2H), 4.68 (s, 2H).

<sup>13</sup>C NMR (150 MHz, CDCl<sub>3</sub>): δ 151.2, 144.7, 130.5, 129.4, 124.8, 123.3, 119.0, 118.0, 113.6, 113.5, 67.3.

HRMS (ESI): *m/z* [M+H]<sup>+</sup> calcd for C<sub>20</sub>H<sub>18</sub>Br<sub>2</sub>N<sub>3</sub><sup>+</sup>: 459.9842; found: 459.9844.

## 14) 1,2-Bis(3,4-dimethylphenyl)-4-phenyl-1,2,4-triazolidine (16)

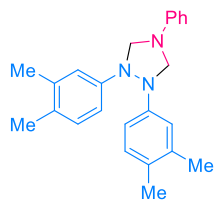

Prepared according to the general procedure from (*E*)-1,2-bis(3,4-dimethylphenyl)diazene (47.6 mg, 0.2 mmol) and *N*-phenyl glycine (75.6 mg, 0.5 mmol, 2.5 equiv.). Purified by column chromatography on neutral alumina (PE: EtOAc = 200:1) to afford the pure product **16**.

White solid, m.p. 145–147 °C; yield: 58.6 mg (82%).

<sup>1</sup>H NMR (400 MHz, CDCl<sub>3</sub>): δ 7.26–7.21 (m, 2H), 7.07–7.01 (m, 4H), 6.96–6.93 (m, 2H), 6.77 (t, *J* = 7.2 Hz, 1H), 6.59 (d, *J* = 8.0 Hz, 2H), 4.84 (s, 2H), 4.65 (s, 2H), 2.26 (s, 6H), 2.21 (s, 6H).

<sup>13</sup>C NMR (150 MHz, CDCl<sub>3</sub>): δ 148.4, 145.3, 137.3, 130.2, 129.5, 129.3, 118.1, 116.5, 113.2, 112.5, 67.0, 20.1, 18.8.

HRMS (ESI): *m/z* [M+H]<sup>+</sup> calcd for C<sub>24</sub>H<sub>28</sub>N<sub>3</sub><sup>+</sup>: 358.2278; found: 358.2279.

#### 15) 1,2-Bis(3,5-bis(trifluoromethyl)phenyl)-4-phenyl-1,2,4-triazolidine (17)

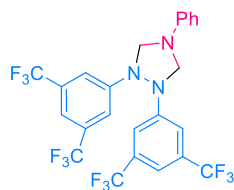

Prepared according to the general procedure from (*E*)-1,2-bis(3,5-bis(trifluoromethyl)phenyl)diazene (90.8 mg, 0.2 mmol) and *N*-phenyl glycine (75.6 mg, 0.5 mmol, 2.5 equiv.). Purified by column chromatography on silica gel (PE: EtOAc = 100:1) to afford the pure product **17**.

White solid, m.p. 136–137 °C; yield: 58.5 mg (51%).

<sup>1</sup>H NMR (400 MHz, CDCl<sub>3</sub>): δ 7.60–7.56 (m, 4H), 7.56–7.51 (m, 2H), 7.33–7.27 (m, 2H), 6.90 (t, *J* = 7.6 Hz, 1H), 6.8 (d, *J* = 7.6 Hz, 2H), 4.90 (s, 2H), 4.87 (s, 2H).

<sup>13</sup>C NMR (150 MHz, CDCl<sub>3</sub>): δ 150.9, 144.2, 133.0 (q, *J* = 33.0 Hz), 129.7, 124.1 (d, *J* = 271.5 Hz), 120.2, 116.1 (quint, *J* = 3.0 Hz), 115.0 (d, *J* = 4.5 Hz), 114.0, 68.3.

<sup>19</sup>F NMR (376 MHz, CDCl<sub>3</sub>): δ = -63.3.

HRMS (ESI): *m/z* [M+H]<sup>+</sup> calcd for C<sub>24</sub>H<sub>16</sub>F<sub>12</sub>N<sub>3</sub><sup>+</sup>: 574.1147; found: 574.1150.

#### 16) 4-Phenyl-1,2-di-*o*-tolyl-1,2,4-triazolidine (18)

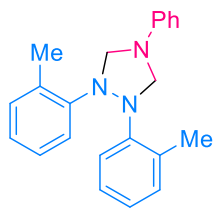

Prepared according to the general procedure from (*E*)-1,2-di-*o*-tolylidiazene (42.0 mg, 0.2 mmol) and *N*-phenyl glycine (75.6 mg, 0.5 mmol, 2.5 equiv.). Purified by column chromatography on neutral alumina (PE: EtOAc = 200:1) to afford the pure product **18**.

White solid, m.p. 80–81 °C; yield: 19.8 mg (30%).

<sup>1</sup>H NMR (400 MHz, CDCl<sub>3</sub>): δ 7.58–7.55 (m, 2H), 7.30–7.25 (m, 2H), 7.24–7.16 (m, 4H), 7.08–7.00 (m, 2H), 6.83–6.78 (m, 1H), 6.59–6.55 (m, 2H), 4.96 (s, 2H), 4.57 (s, 2H), 2.42 (s, 6H).

<sup>13</sup>C NMR (150 MHz, CDCl<sub>3</sub>): δ 150.1, 144.7, 131.2, 129.8, 129.4, 126.3, 123.6, 117.9, 117.8, 112.8, 69.1, 19.2.

HRMS (ESI): *m/z* [M+H]<sup>+</sup> calcd for C<sub>22</sub>H<sub>24</sub>N<sub>3</sub><sup>+</sup>: 330.1965; found: 330.1965.

#### 17) 1,2-Di-*o*-tolylhydrazine (**19**)<sup>[4]</sup>

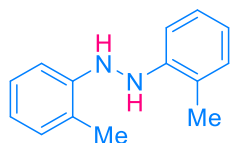

Prepared according to the general procedure from (*E*)-1,2-di-*o*-tolylidiazene (42.0 mg, 0.2 mmol) and *N*-phenyl glycine (75.6 mg, 0.5 mmol, 2.5 equiv.). Purified by column chromatography on neutral alumina (PE: EtOAc = 200:1) to afford the pure product **19**.

White solid; yield: 22.5 mg (53%).

<sup>1</sup>H NMR (400 MHz, CDCl<sub>3</sub>): δ 7.15–7.10 (m, 4H), 6.96–6.89 (m, 2H), 6.87–6.75 (m, 2H), 5.54 (s, 2H), 2.29 (s, 6H).

<sup>13</sup>C NMR (150 MHz, CDCl<sub>3</sub>): δ 146.2, 130.4, 127.2, 121.1, 119.4, 111.0, 17.1.

#### 18) 1,2-Bis(2-chlorophenyl)hydrazine (**20**)<sup>[4]</sup>

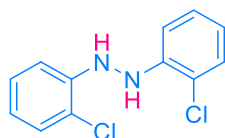

Prepared according to the general procedure from (*E*)-1,2-bis(2-chlorophenyl)diazene (50.0 mg, 0.2 mmol) and *N*-phenyl glycine (75.6 mg, 0.5 mmol, 2.5 equiv.). Purified by column chromatography on neutral alumina (PE: EtOAc = 200:1) to afford the pure product **20**.



White solid; yield: 21.8 mg (43%).

$^1\text{H}$  NMR (400 MHz,  $\text{CDCl}_3$ ):  $\delta$  7.34–7.31 (m, 2H), 7.19–7.12 (m, 2H), 7.00–6.96 (m, 2H), 6.86–6.77 (m, 2H), 6.22 (s, 2H).

$^{13}\text{C}$  NMR (150 MHz,  $\text{CDCl}_3$ ):  $\delta$  143.8, 129.3, 127.9, 120.2, 117.9, 112.8.

**19) 1,2-Bis(2-bromophenyl)hydrazine (21)**<sup>[4]</sup>

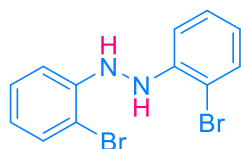

Prepared according to the general procedure from (*E*)-1,2-bis(2-bromophenyl)diazene (67.6 mg, 0.2 mmol) and *N*-phenyl glycine (75.6 mg, 0.5 mmol, 2.5 equiv.). Purified by column chromatography on neutral alumina (PE: EtOAc = 200:1) to afford the pure product **21**.

White solid; yield: 26.7 mg (39%).

$^1\text{H}$  NMR (400 MHz,  $\text{CDCl}_3$ ):  $\delta$  7.48–7.45 (m, 2H), 7.20–7.15 (m, 2H), 6.96–6.91 (m, 2H), 6.77–6.70 (m, 2H), 6.23 (s, 2H).

$^{13}\text{C}$  NMR (150 MHz,  $\text{CDCl}_3$ ):  $\delta$  144.7, 132.5, 128.6, 120.8, 113.1, 107.5.

**20) 1,4-Diphenyl-2-(*p*-tolyl)-1,2,4-triazolidine (22)**<sup>[3]</sup>

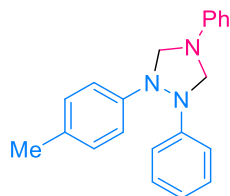

Prepared according to the general procedure from (*E*)-1-phenyl-2-(*p*-tolyl)diazene (39.2 mg, 0.2 mmol) and *N*-phenyl glycine (75.6 mg, 0.5 mmol, 2.5 equiv.). Purified by column chromatography on silica gel (PE: EtOAc = 200:1) to afford the pure product **22**.

White solid, m.p. 106–107 °C; yield: 58.7 mg (93%).

$^1\text{H}$  NMR (400 MHz,  $\text{CDCl}_3$ ):  $\delta$  7.32–7.18 (m, 6H), 7.11–7.10 (m, 4H), 6.99–6.94 (m, 1H), 6.79 (t,  $J$  = 7.2 Hz, 1H), 6.61–6.56 (m, 2H), 4.89–4.63 (m, 4H), 2.30 (s, 3H).

$^{13}\text{C}$  NMR (150 MHz,  $\text{CDCl}_3$ ):  $\delta$  150.1, 147.9, 145.1, 131.1, 129.7, 129.3, 129.1, 121.3, 118.2, 115.2, 114.8, 113.2, 67.3, 66.9, 20.5.

HRMS (ESI):  $m/z$   $[\text{M}+\text{H}]^+$  calcd for  $\text{C}_{21}\text{H}_{22}\text{N}_3^+$ : 316.1808; found: 316.1808.

**21) 1-(4-Isopropylphenyl)-2,4-diphenyl-1,2,4-triazolidine (23)**

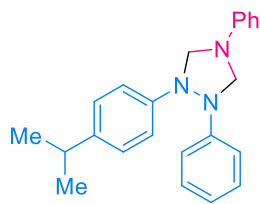

Prepared according to the general procedure from (*E*)-1-(4-isopropylphenyl)-2-phenyldiazene (44.8 mg, 0.2 mmol) and *N*-phenyl glycine (75.6 mg, 0.5 mmol, 2.5 equiv.). Purified by column chromatography on silica gel (PE: EtOAc = 200:1) to afford the pure product **23**.

White solid, m.p. 100–101 °C; yield: 61.8 mg (90%).

<sup>1</sup>H NMR (400 MHz, CDCl<sub>3</sub>): δ 7.31–7.12 (m, 10H), 6.97–6.92 (m, 1H), 6.80–6.75 (m, 1H), 6.61–6.56 (m, 2H), 4.94–4.58 (m, 4H), 2.90–2.81 (m, 1H), 1.22 (d, *J* = 6.8 Hz, 6H).

<sup>13</sup>C NMR (150 MHz, CDCl<sub>3</sub>): δ 150.2, 148.2, 145.1, 142.2, 129.3, 129.1, 127.0, 121.3, 118.2, 115.2, 114.9, 113.1, 67.3, 66.9, 33.3, 24.1.

HRMS (ESI): *m/z* [M+H]<sup>+</sup> calcd for C<sub>23</sub>H<sub>26</sub>N<sub>3</sub><sup>+</sup>: 344.2121; found: 344.2121.

## 22) 1-(4-(*Tert*-butyl)phenyl)-2,4-diphenyl-1,2,4-triazolidine (**24**)

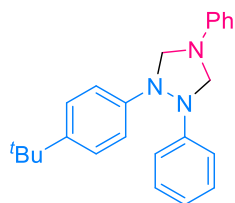

Prepared according to the general procedure from (*E*)-1-(4-(*tert*-butyl)phenyl)-2-phenyldiazene (47.6 mg, 0.2 mmol) and *N*-phenyl glycine (75.6 mg, 0.5 mmol, 2.5 equiv.). Purified by column chromatography on silica gel (PE: EtOAc = 200:1) to afford the pure product **24**.

White solid, m.p. 121–122 °C; yield: 65.1 mg (91%).

<sup>1</sup>H NMR (400 MHz, CDCl<sub>3</sub>): δ 7.37–7.20 (m, 8H), 7.18–7.13 (m, 2H), 7.00–6.95 (m, 1H), 6.81–6.77 (m, 1H), 6.63–6.56 (m, 2H), 4.97–4.58 (m, 4H), 1.32 (s, 9H).

<sup>13</sup>C NMR (150 MHz, CDCl<sub>3</sub>): δ 150.2, 147.8, 145.1, 144.4, 129.3, 129.1, 126.0, 121.4, 118.2, 114.9, 114.8, 113.1, 67.2, 66.9, 34.1, 31.5.

HRMS (ESI): *m/z* [M+H]<sup>+</sup> calcd for C<sub>24</sub>H<sub>28</sub>N<sub>3</sub><sup>+</sup>: 358.2278; found: 358.2284.

## 23) 1-(4-Fluorophenyl)-2,4-diphenyl-1,2,4-triazolidine (**25**)<sup>[3]</sup>

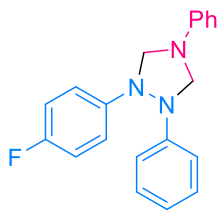

Prepared according to the general procedure from (*E*)-1-(4-fluorophenyl)-2-phenyldiazene (40.0 mg, 0.2 mmol) and *N*-phenyl glycine (75.6 mg, 0.5 mmol, 2.5 equiv.). Purified by column chromatography on silica gel (PE: EtOAc = 200:1) to afford the pure product **25**.

White solid, m.p. 96–97 °C; yield: 54.3 mg (85%).

<sup>1</sup>H NMR (400 MHz, CDCl<sub>3</sub>): δ 7.37–7.24 (m, 4H), 7.23–7.13 (m, 4H), 7.03–6.98 (m, 3H), 6.86–6.80 (m, 1H), 6.64–6.60 (m, 2H), 4.89–4.61 (m, 4H).

<sup>13</sup>C NMR (150 MHz, CDCl<sub>3</sub>): δ 158.3 (d, *J* = 238.5 Hz), 149.9, 146.5 (d, *J* = 1.5 Hz), 145.0, 129.3, 129.2, 121.6, 118.5, 116.6 (d, *J* = 7.5 Hz), 115.6 (d, *J* = 22.5 Hz), 114.8, 113.3, 67.7, 67.2.

<sup>19</sup>F NMR (376 MHz, CDCl<sub>3</sub>): δ = -123.3 – -123.4.

HRMS (ESI): *m/z* [M+H]<sup>+</sup> calcd for C<sub>20</sub>H<sub>19</sub>FN<sub>3</sub><sup>+</sup>: 320.1558; found: 320.1560.

#### 24) 1-(4-Chlorophenyl)-2,4-diphenyl-1,2,4-triazolidine (**26**)<sup>[3]</sup>

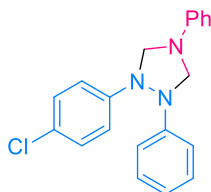

Prepared according to the general procedure from (*E*)-1-(4-chlorophenyl)-2-phenyldiazene (43.3 mg, 0.2 mmol) and *N*-phenyl glycine (75.6 mg, 0.5 mmol, 2.5 equiv.). Purified by column chromatography on silica gel (PE: EtOAc = 200:1) to afford the pure product **26**.

White solid, m.p. 120–121 °C; yield: 58.4 mg (87%).

<sup>1</sup>H NMR (400 MHz, CDCl<sub>3</sub>): δ 7.36–7.30 (m, 2H), 7.30–7.24 (m, 4H), 7.21–7.16 (m, 2H), 7.16–7.11 (m, 2H), 7.04–6.97 (m, 1H), 6.86–6.80 (t, *J* = 7.4 Hz, 1H), 6.64–6.60 (m, 2H), 4.89–4.68 (m, 4H).

<sup>13</sup>C NMR (150 MHz, CDCl<sub>3</sub>): δ 149.8, 148.7, 144.9, 129.4, 129.2, 129.0, 126.4, 121.8, 118.6, 116.2, 115.0, 113.3, 67.3, 67.1.

HRMS (ESI): *m/z* [M+H]<sup>+</sup> calcd for C<sub>20</sub>H<sub>19</sub>ClN<sub>3</sub><sup>+</sup>: 336.1262; found: 336.1262.

#### 25) 1-(4-Bromophenyl)-2,4-diphenyl-1,2,4-triazolidine (**27**)

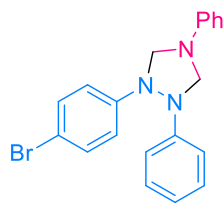

Prepared according to the general procedure from (*E*)-1-(4-bromophenyl)-2-phenyldiazene (52.2 mg, 0.2 mmol) and *N*-phenyl glycine (75.6 mg, 0.5 mmol, 2.5 equiv.). Purified by column chromatography on silica gel (PE: EtOAc = 200:1) to afford the pure product **27**.

White solid, m.p. 155–156 °C; yield: 63.1 mg (83%).

<sup>1</sup>H NMR (400 MHz, CDCl<sub>3</sub>): δ 7.42–7.35 (m, 2H), 7.33–7.22 (m, 4H), 7.17–7.13 (m, 2H), 7.09–7.03 (m, 2H), 7.02–6.95 (m, 1H), 6.84–6.79 (m, 1H), 6.63–6.59 (m, 2H), 4.75 (s, 4H).

<sup>13</sup>C NMR (150 MHz, CDCl<sub>3</sub>): δ 149.8, 149.2, 144.9, 131.9, 129.4, 129.2, 121.8, 118.7, 116.6, 115.0, 113.7, 113.3, 67.3, 67.0.

HRMS (ESI): *m/z* [M+H]<sup>+</sup> calcd for C<sub>20</sub>H<sub>19</sub>BrN<sub>3</sub><sup>+</sup>: 380.0757; found: 380.0760.

#### 26) 1-(4-Iodophenyl)-2,4-diphenyl-1,2,4-triazolidine (28)

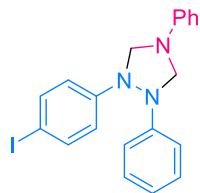

Prepared according to the general procedure from (*E*)-1-(4-iodophenyl)-2-phenyldiazene (61.6 mg, 0.2 mmol) and *N*-phenyl glycine (75.6 mg, 0.5 mmol, 2.5 equiv.). Purified by column chromatography on silica gel (PE: EtOAc = 200:1) to afford the pure product **28**.

White solid, m.p. 178–179 °C; yield: 70.1 mg (82%).

<sup>1</sup>H NMR (400 MHz, CDCl<sub>3</sub>): δ 7.61–7.50 (m, 2H), 7.33–7.22 (m, 4H), 7.14 (d, *J* = 8.0 Hz, 2H), 7.00–6.93 (m, 3H), 6.80 (t, *J* = 7.2 Hz, 1H), 6.60 (d, *J* = 8.0 Hz, 2H), 4.87–4.65 (m, 4H).

<sup>13</sup>C NMR (150 MHz, CDCl<sub>3</sub>): δ 149.9, 149.8, 144.9, 137.9, 129.4, 129.2, 121.9, 118.7, 117.1, 115.1, 113.4, 83.6, 67.3, 66.9.

HRMS (ESI): *m/z* [M+H]<sup>+</sup> calcd for C<sub>20</sub>H<sub>19</sub>IN<sub>3</sub><sup>+</sup>: 428.0618; found: 420.0619.

#### 27) 1-(4-Methoxyphenyl)-2,4-diphenyl-1,2,4-triazolidine (29)

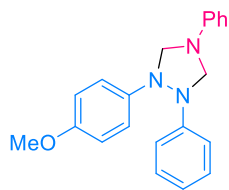

Prepared according to the general procedure from (*E*)-1-(4-methoxyphenyl)-2-phenyldiazene (42.4 mg, 0.2 mmol) and *N*-phenyl glycine (75.6 mg, 0.5 mmol, 2.5 equiv.). Purified by column chromatography on silica gel (PE: EtOAc = 50:1) to afford the pure product **29**.

White solid, m.p. 92–93 °C; yield: 58.3 mg (88%).

<sup>1</sup>H NMR (400 MHz, CDCl<sub>3</sub>): δ 7.33–7.28 (m, 2H), 7.25–7.14 (m, 6H), 6.98–6.93 (m, 1H), 6.88–6.83 (m, 2H), 6.81–6.76 (m, 1H), 6.62–6.57 (m, 2H), 4.86–4.77 (m, 3H), 4.59 (s, 1H), 3.78 (s, 3H).

<sup>13</sup>C NMR (150 MHz, CDCl<sub>3</sub>): δ 155.1, 150.1, 145.1, 144.1, 129.3, 129.1, 121.2, 118.2, 117.0, 114.7, 114.5, 113.2, 67.8, 66.9, 55.6.

HRMS (ESI): *m/z* [M+H]<sup>+</sup> calcd for C<sub>21</sub>H<sub>22</sub>ON<sub>3</sub><sup>+</sup>: 332.1757; found: 332.1761.

#### 28) 1,4-Diphenyl-2-(4-(trifluoromethoxy)phenyl)-1,2,4-triazolidine (30)

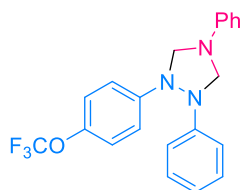

Prepared according to the general procedure from (*E*)-1-phenyl-2-(4-(trifluoromethoxy)phenyl)diazene (53.2 mg, 0.2 mmol) and *N*-phenyl glycine (75.6 mg, 0.5 mmol, 2.5 equiv.). Purified by column chromatography on silica gel (PE: EtOAc = 200:1) to afford the pure product **30**.

Colorless oil; yield: 62.4 mg (81%).

<sup>1</sup>H NMR (400 MHz, CDCl<sub>3</sub>): δ 7.34–7.29 (m, 2H), 7.28–7.23 (m, 2H), 7.21–7.15 (m, 6H), 7.02–6.97 (m, 1H), 7.85–6.79 (m, 1H), 6.64–6.59 (m, 2H), 4.89–4.72 (m, 4H).

<sup>13</sup>C NMR (150 MHz, CDCl<sub>3</sub>): δ 149.9, 148.8, 144.9, 143.5 (d, *J* = 3.0 Hz), 129.3 (d, *J* = 12.0 Hz), 122.1, 121.9, 120.5 (d, *J* = 255.0 Hz), 118.7, 115.8, 115.0, 113.4, 67.4, 67.3.

HRMS (ESI): *m/z* [M+H]<sup>+</sup> calcd for C<sub>21</sub>H<sub>19</sub>F<sub>3</sub>ON<sub>3</sub><sup>+</sup>: 386.1475; found: 386.1474.

#### 29) Ethyl 4-(2,4-diphenyl-1,2,4-triazolidin-1-yl)benzoate (31)

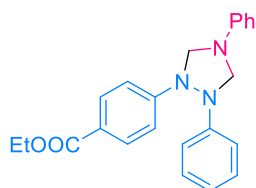

Prepared according to the general procedure from (*E*)-4-(phenyldiazenyl)phenyl propionate (50.8 mg, 0.2 mmol) and *N*-phenyl glycine (75.6 mg, 0.5 mmol, 2.5 equiv.). Purified by column chromatography on silica gel (PE: EtOAc = 200:1) to afford the pure product **31**.

Colorless oil; yield: 59.8 mg (80%).

<sup>1</sup>H NMR (400 MHz, CDCl<sub>3</sub>): δ 7.99 (d, *J* = 8.8 Hz, 2H), 7.35–7.25 (m, 4H), 7.18–7.12 (m, 4H), 7.02 (t, *J* = 7.2 Hz, 1H), 6.83 (t, *J* = 7.2 Hz, 1H), 6.63 (d, *J* = 7.6 Hz, 2H), 4.97–4.85 (s, 3H), 4.60 (s, 1H), 4.36 (q, *J* = 7.2 Hz, 2H), 1.39 (t, *J* = 7.2 Hz, 3H).

<sup>13</sup>C NMR (150 MHz, CDCl<sub>3</sub>): δ 166.4, 153.0, 149.8, 144.9, 131.2, 129.4, 129.3, 122.8, 122.3, 118.8, 115.4, 113.4, 113.3, 67.8, 66.0, 60.5, 14.4.

HRMS (ESI): *m/z* [M+H]<sup>+</sup> calcd for C<sub>23</sub>H<sub>24</sub>O<sub>2</sub>N<sub>3</sub><sup>+</sup>: 374.1863; found: 374.1862.

### 30) 4-(2,4-Diphenyl-1,2,4-triazolidin-1-yl)benzonitrile (32)

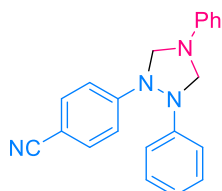

Prepared according to the general procedure from (*E*)-4-(phenyldiazenyl)benzonitrile (41.4 mg, 0.2 mmol) and *N*-phenyl glycine (75.6 mg, 0.5 mmol, 2.5 equiv.). Purified by column chromatography on silica gel (PE: EtOAc = 100:1) to afford the pure product **32**.

White solid, m.p. 143–144 °C; yield: 45.0 mg (69%).

<sup>1</sup>H NMR (400 MHz, CDCl<sub>3</sub>): δ 7.58–7.53 (m, 2H), 7.35–7.30 (m, 2H), 7.29–7.25 (m, 2H), 7.16–7.11 (m, 4H), 7.07–7.02 (m, 1H), 6.89–6.82 (m, 1H), 6.66–6.62 (m, 2H), 5.02–4.94 (m, 1H), 4.89–4.81 (m, 2H), 4.57 (s, 1H).

<sup>13</sup>C NMR (150 MHz, CDCl<sub>3</sub>): δ 152.4, 149.4, 144.7, 133.5, 129.4, 129.3, 122.7, 119.5, 119.2, 115.5, 113.9, 113.6, 103.1, 68.3, 65.8.

HRMS (ESI): *m/z* [M+H]<sup>+</sup> calcd for C<sub>21</sub>H<sub>19</sub>N<sub>4</sub><sup>+</sup>: 327.1604; found: 327.1605.

### 31) 1-(4-Nitrophenyl)-2,4-diphenyl-1,2,4-triazolidine (33)

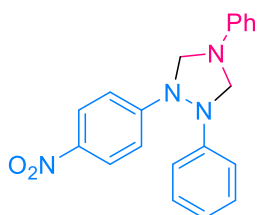

Prepared according to the general procedure from (*E*)-1-(4-nitrophenyl)-2-phenyldiazene (45.4 mg, 0.2 mmol) and *N*-phenyl glycine (75.6 mg, 0.5 mmol, 2.5 equiv.). Purified by column chromatography on silica gel (PE: EtOAc = 50:1) to afford the pure product **33**.

Yellow solid, m.p. 130–131 °C; yield: 53.3 mg (77%).

<sup>1</sup>H NMR (400 MHz, CDCl<sub>3</sub>): δ 8.20–8.16 (m, 2H), 7.36–7.26 (m, 4H), 7.15–7.11 (m, 2H), 7.10–7.04 (m, 3H), 6.87 (t, *J* = 7.4 Hz, 1H), 6.66 (d, *J* = 8.0 Hz, 2H), 4.99 (s, 2H), 4.84 (s, 1H), 4.57 (s, 1H).

<sup>13</sup>C NMR (150 MHz, CDCl<sub>3</sub>): δ 153.6, 149.3, 144.6, 140.9, 129.5, 129.4, 125.8, 123.1, 119.4, 115.8, 113.7, 112.7, 68.8, 65.6.

HRMS (ESI): *m/z* [M+H]<sup>+</sup> calcd for C<sub>20</sub>H<sub>19</sub>O<sub>2</sub>N<sub>4</sub><sup>+</sup>: 347.1503; found: 347.1505.

### 32) 1-(4-(Methylsulfonyl)phenyl)-2,4-diphenyl-1,2,4-triazolidine (34)

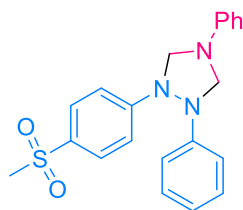

Prepared according to the general procedure from (*E*)-1-(4-(methylsulfonyl)phenyl)-2-phenyldiazene (52.0 mg, 0.2 mmol) and *N*-phenyl glycine (75.6 mg, 0.5 mmol, 2.5 equiv.). Purified by column chromatography on silica gel (PE: EtOAc = 50:1) to afford the pure product **34**.

White solid, m.p. 183–184 °C; yield: 39.7 mg (76%).

<sup>1</sup>H NMR (400 MHz, CDCl<sub>3</sub>): δ 7.75 (d, *J* = 8.8 Hz, 2H), 7.26–7.22 (m, 2H), 7.21–7.15 (m, 2H), 7.14–7.10 (m, 2H), 7.05 (d, *J* = 8.0 Hz, 2H), 6.96 (t, *J* = 7.4 Hz, 1H), 6.76 (t, *J* = 7.2 Hz, 1H), 6.55 (d, *J* = 8.0 Hz, 2H), 4.91–4.76 (m, 3H), 4.50 (s, 1H), 2.94 (s, 3H).

<sup>13</sup>C NMR (150 MHz, CDCl<sub>3</sub>): δ 153.4, 149.4, 144.7, 131.7, 129.5, 129.3, 129.1, 122.7, 119.1, 115.6, 113.7, 113.6, 68.3, 66.0, 44.9.

HRMS (ESI): *m/z* [M+H]<sup>+</sup> calcd for C<sub>21</sub>H<sub>22</sub>O<sub>2</sub>SN<sub>3</sub><sup>+</sup>: 380.1427; found: 380.1434.

### 33) 1-(4-(2,4-Diphenyl-1,2,4-triazolidin-1-yl)phenyl)ethan-1-one (35)

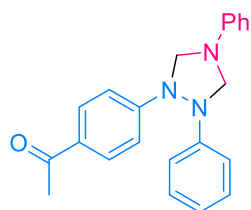

Prepared according to the general procedure from (*E*)-1-(4-(phenyldiazenyl)phenyl)ethan-1-one (44.8 mg, 0.2 mmol) and *N*-phenyl glycine (75.6 mg, 0.5 mmol, 2.5 equiv.). Purified by column chromatography on silica gel (PE: EtOAc = 100:1) to afford the pure product **35**.

White solid, m.p. 117–118 °C; yield: 43.27 mg (63%).

<sup>1</sup>H NMR (400 MHz, CDCl<sub>3</sub>): δ 7.95–7.90 (m, 2H), 7.36–7.29 (m, 2H), 7.28–7.23 (m, 2H), 7.18–7.11 (m, 4H), 7.02 (s, 1H), 6.83 (t, *J* = 7.2 Hz, 1H), 6.63 (d, *J* = 8.0 Hz, 2H), 4.98 (s, 1H), 4.87 (s, 2H), 4.59 (s, 1H), 2.55 (s, 3H).

<sup>13</sup>C NMR (150 MHz, CDCl<sub>3</sub>): δ 196.6, 153.1, 149.7, 144.8, 130.3, 130.1, 129.4, 129.3, 122.4, 118.9, 115.5, 113.5, 113.2, 68.0, 65.9, 26.2.

HRMS (ESI): *m/z* [M+H]<sup>+</sup> calcd for C<sub>20</sub>H<sub>19</sub>FN<sub>3</sub><sup>+</sup>: 344.1757; found: 344.1754.

#### 34) 1-(3-Chlorophenyl)-2,4-diphenyl-1,2,4-triazolidine (36)

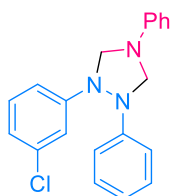

Prepared according to the general procedure from (*E*)-1-(3-chlorophenyl)-2-phenyldiazene (43.3 mg, 0.2 mmol) and *N*-phenyl glycine (75.6 mg, 0.5 mmol, 2.5 equiv.). Purified by column chromatography on silica gel (PE: EtOAc = 200:1) to afford the pure product **36**.

White solid, m.p. 95–96 °C; yield: 54.4 mg (81%).

<sup>1</sup>H NMR (400 MHz, CDCl<sub>3</sub>): δ 7.35–7.22 (m, 6H), 7.21–7.17 (m, 2H), 7.05–6.99 (m, 2H), 6.97–6.92 (m, 1H), 6.83 (t, *J* = 7.2 Hz, 1H), 6.62 (d, *J* = 8.0 Hz, 2H), 4.90–4.67 (m, 4H).

<sup>13</sup>C NMR (150 MHz, CDCl<sub>3</sub>): δ 151.3, 149.8, 144.9, 135.1, 130.2, 129.4, 129.2, 122.0, 121.4, 118.7, 115.1, 114.9, 113.3, 113.0, 67.4, 66.9.

HRMS (ESI): *m/z* [M+H]<sup>+</sup> calcd for C<sub>20</sub>H<sub>19</sub>ClN<sub>3</sub><sup>+</sup>: 336.1262; found: 336.1263.

#### 35) 1,2-Diphenyl-4-(*p*-tolyl)-1,2,4-triazolidine (37)

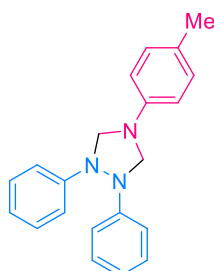



Prepared according to the general procedure from azobenzene (36.4 mg, 0.2 mmol) and *p*-tolylglycine (82.6 mg, 0.5 mmol, 2.5 equiv.). Purified by column chromatography on silica gel (PE: EtOAc = 200:1) to afford the pure product **37**.

White solid, m.p. 94–95 °C; yield: 56.1 mg (89%).

<sup>1</sup>H NMR (400 MHz, CDCl<sub>3</sub>): δ 7.32–7.27 (m, 4H), 7.20–7.16 (m, 4H), 7.07–7.03 (m, 2H), 6.99–6.94 (m, 2H), 6.56–6.52 (m, 2H), 4.85 (s, 2H), 4.68 (s, 2H), 2.25 (s, 3H).

<sup>13</sup>C NMR (150 MHz, CDCl<sub>3</sub>): δ 150.2, 143.1, 129.8, 129.1, 127.8, 121.4, 114.9, 113.5, 67.6, 20.4.

HRMS (ESI): *m/z* [M+H]<sup>+</sup> calcd for C<sub>21</sub>H<sub>22</sub>N<sub>3</sub><sup>+</sup>: 316.1808; found: 316.1806.

### 36) 4-(4-Isopropylphenyl)-1,2-diphenyl-1,2,4-triazolidine (38)

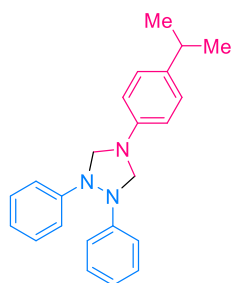

Prepared according to the general procedure from azobenzene (36.4 mg, 0.2 mmol) and (4-isopropylphenyl)glycine (96.6 mg, 0.5 mmol, 2.5 equiv.). Purified by column chromatography on silica gel (PE: EtOAc = 200:1) to afford the pure product **38**.

White solid, m.p. 88–90 °C; yield: 57.7 mg (84%).

<sup>1</sup>H NMR (400 MHz, CDCl<sub>3</sub>): δ 7.36–7.29 (m, 4H), 7.24–7.19 (m, 4H), 7.16–7.12 (m, 2H), 7.01–6.96 (m, 2H), 6.62–6.57 (m, 2H), 4.89 (s, 2H), 4.71 (s, 2H), 2.90–2.80 (m, 1H), 1.24 (d, *J* = 7.2 Hz, 6H).

<sup>13</sup>C NMR (150 MHz, CDCl<sub>3</sub>): δ 150.2, 143.3, 139.0, 129.2, 127.3, 121.5, 115.0, 113.4, 67.5, 33.2, 24.2.

HRMS (ESI): *m/z* [M+H]<sup>+</sup> calcd for C<sub>23</sub>H<sub>26</sub>N<sub>3</sub><sup>+</sup>: 344.2121; found: 344.2122.

### 37) 4-(4-(*Tert*-butyl)phenyl)-1,2-diphenyl-1,2,4-triazolidine (39)

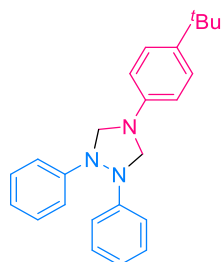

Prepared according to the general procedure from azobenzene (36.4 mg, 0.2 mmol) and

(4-(*tert*-butyl)phenyl)glycinee (103.6 mg, 0.5 mmol, 2.5 equiv.). Purified by column chromatography on silica gel (PE: EtOAc = 200:1) to afford the pure product **39**.

Colorless oil; yield: 59.3 mg (83%).

$^1\text{H}$  NMR (400 MHz,  $\text{CDCl}_3$ ):  $\delta$  7.30–7.25 (m, 6H), 7.18–7.15 (m, 4H), 6.97–6.92 (m, 2H), 6.57–6.54 (m, 2H), 4.85 (s, 2H), 4.68 (s, 2H), 1.26 (s, 9H).

$^{13}\text{C}$  NMR (150 MHz,  $\text{CDCl}_3$ ):  $\delta$  150.2, 142.8, 141.2, 129.1, 126.1, 121.4, 115.0, 113.0, 67.3, 33.9, 31.4.

HRMS (ESI):  $m/z$   $[\text{M}+\text{H}]^+$  calcd for  $\text{C}_{24}\text{H}_{28}\text{N}_3^+$ : 358.2278; found: 358.2277.

### 38) 4-(4-Fluorophenyl)-1,2-diphenyl-1,2,4-triazolidine (40)

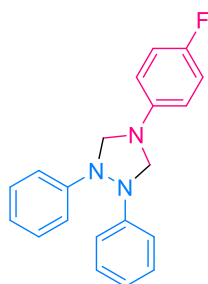

Prepared according to the general procedure from azobenzene (36.4 mg, 0.2 mmol) and (4-fluorophenyl)glycinee (84.6 mg, 0.5 mmol, 2.5 equiv.). Purified by column chromatography on silica gel (PE: EtOAc = 200:1) to afford the pure product **40**.

White solid, m.p. 114–115 °C; yield: 53.7 mg (84%).

$^1\text{H}$  NMR (400 MHz,  $\text{CDCl}_3$ ):  $\delta$  7.33–7.27 (m, 4H), 7.20–7.16 (m, 4H), 7.01–6.92 (m, 4H), 6.57–6.52 (m, 2H), 4.82 (s, 2H), 4.68 (s, 2H).

$^{13}\text{C}$  NMR (150 MHz,  $\text{CDCl}_3$ ):  $\delta$  156.5 (d,  $J = 235.5$  Hz), 150.1, 141.9 (d,  $J = 1.5$  Hz), 129.2, 121.6, 115.8 (d,  $J = 22.5$  Hz), 114.5 (d,  $J = 7.5$  Hz), 114.4, 67.9.

HRMS (ESI):  $m/z$   $[\text{M}+\text{H}]^+$  calcd for  $\text{C}_{20}\text{H}_{19}\text{FN}_3^+$ : 320.1558; found: 320.1555.

### 39) 4-(4-Chlorophenyl)-1,2-diphenyl-1,2,4-triazolidine (41)

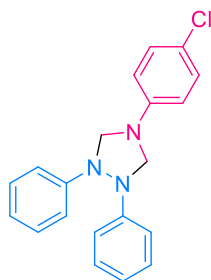

Prepared according to the general procedure from azobenzene (36.4 mg, 0.2 mmol) and

(4-chlorophenyl)glycine (92.8 mg, 0.5 mmol, 2.5 equiv.). Purified by column chromatography on silica gel (PE: EtOAc = 200:1) to afford the pure product **41**.

White solid, m.p. 132–133 °C; yield: 57.1 mg (85%).

<sup>1</sup>H NMR (400 MHz, CDCl<sub>3</sub>): δ 7.30 (t, *J* = 7.8 Hz, 4H), 7.22–7.15 (m, 6H), 7.00–6.95 (m, 2H), 6.52–6.48 (m, 2H), 4.83 (s, 2H), 4.66 (s, 2H).

<sup>13</sup>C NMR (150 MHz, CDCl<sub>3</sub>): δ 149.9, 143.6, 129.21, 129.19, 123.2, 121.7, 115.0, 114.3, 67.1.

HRMS (ESI): *m/z* [M+H]<sup>+</sup> calcd for C<sub>20</sub>H<sub>19</sub>ClN<sub>3</sub><sup>+</sup>: 336.1262; found: 336.1258.

#### 40) 4-(4-Bromophenyl)-1,2-diphenyl-1,2,4-triazolidine (**42**)

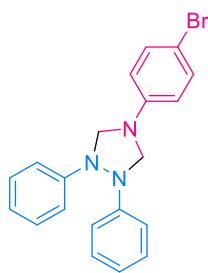

Prepared according to the general procedure from azobenzene (36.4 mg, 0.2 mmol) and (4-bromophenyl)glycine (115.0 mg, 0.5 mmol, 2.5 equiv.). Purified by column chromatography on silica gel (PE: EtOAc = 200:1) to afford the pure product **42**.

White solid, m.p. 137–138 °C; yield: 62.4 mg (82%).

<sup>1</sup>H NMR (400 MHz, CDCl<sub>3</sub>): δ 7.33–7.28 (m, 6H), 7.20–7.15 (m, 4H), 7.01–6.95 (m, 2H), 6.49–6.42 (m, 2H), 4.83 (s, 2H), 4.65 (s, 2H).

<sup>13</sup>C NMR (150 MHz, CDCl<sub>3</sub>): δ 149.9, 143.9, 132.1, 129.2, 121.7, 115.0, 114.7, 110.3, 67.0.

HRMS (ESI): *m/z* [M+H]<sup>+</sup> calcd for C<sub>20</sub>H<sub>19</sub>BrN<sub>3</sub><sup>+</sup>: 380.0757; found: 380.0759.

#### 41) 4-(4-Methoxyphenyl)-1,2-diphenyl-1,2,4-triazolidine (**43**)

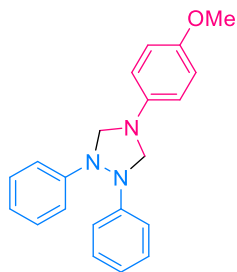

Prepared according to the general procedure from azobenzene (36.4 mg, 0.2 mmol) and (4-methoxyphenyl)glycine (90.6 mg, 0.5 mmol, 2.5 equiv.). Purified by column chromatography on

silica gel (PE: EtOAc = 200:1) to afford the pure product **43**.

White solid, m.p. 70–71 °C; yield: 47.1 mg (71%).

<sup>1</sup>H NMR (400 MHz, CDCl<sub>3</sub>): δ 7.30–7.26 (m, 4H), 7.17–7.11 (m, 4H), 6.98–6.91 (m, 2H), 6.83–6.78 (m, 2H), 6.63–6.58 (m, 2H), 4.79 (s, 2H), 4.67 (s, 2H), 3.74 (s, 3H).

<sup>13</sup>C NMR (150 MHz, CDCl<sub>3</sub>): δ 152.9, 150.3, 140.0, 129.1, 121.3, 115.1, 114.9, 114.9, 68.4, 55.7.

HRMS (ESI): *m/z* [M+H]<sup>+</sup> calcd for C<sub>21</sub>H<sub>22</sub>ON<sub>3</sub><sup>+</sup>: 332.1757; found: 332.1758.

#### 42) 1,2-Diphenyl-4-(*m*-tolyl)-1,2,4-triazolidine (**44**)

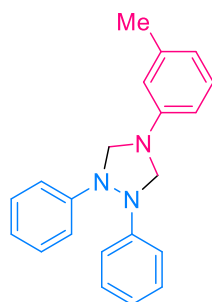

Prepared according to the general procedure from azobenzene (36.4 mg, 0.2 mmol) and *m*-tolylglycine (82.6 mg, 0.5 mmol, 2.5 equiv.). Purified by column chromatography on silica gel (PE: EtOAc = 200:1) to afford the pure product **44**.

White solid, m.p. 118–119 °C; yield: 47.9 mg (76%).

<sup>1</sup>H NMR (400 MHz, CDCl<sub>3</sub>): δ 7.32–7.26 (m, 4H), 7.20–7.16 (m, 4H), 7.15–7.08 (m, 1H), 6.98–6.92 (m, 2H), 6.63–6.58 (m, 1H), 6.43–6.39 (m, 2H), 4.86 (s, 2H), 4.68 (s, 2H), 2.30 (s, 3H).

<sup>13</sup>C NMR (150 MHz, CDCl<sub>3</sub>): δ 150.1, 145.1, 139.2, 129.2, 129.1, 121.5, 119.3, 115.0, 114.0, 110.4, 67.1, 21.7.

HRMS (ESI): *m/z* [M+H]<sup>+</sup> calcd for C<sub>21</sub>H<sub>22</sub>N<sub>3</sub><sup>+</sup>: 316.1808; found: 316.1810.

#### 43) 4-(3-Chlorophenyl)-1,2-diphenyl-1,2,4-triazolidine (**45**)

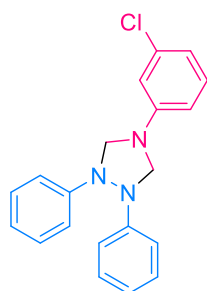

Prepared according to the general procedure from azobenzene (36.4 mg, 0.2 mmol) and (3-chlorophenyl)glycine (92.6 mg, 0.5 mmol, 2.5 equiv.). Purified by column chromatography on silica gel (PE: EtOAc = 200:1) to afford the pure product **45**.

White solid, m.p. 99–101 °C; yield: 49.0 mg (73%).

<sup>1</sup>H NMR (400 MHz, CDCl<sub>3</sub>): δ 7.33–7.28 (m, 4H), 7.20–7.17 (m, 4H), 7.13 (t, *J* = 8.0 Hz, 1H), 7.02–6.94 (m, 2H), 6.77–6.73 (m, 1H), 6.58–6.55 (m, 1H), 6.47–6.42 (m, 1H), 4.88–6.63 (m, 4H).

<sup>13</sup>C NMR (150 MHz, CDCl<sub>3</sub>): δ 149.8, 145.8, 135.1, 130.3, 129.2, 121.8, 118.1, 115.0, 112.9, 111.2, 66.7.

HRMS (ESI): *m/z* [M+H]<sup>+</sup> calcd for C<sub>20</sub>H<sub>19</sub>ClN<sub>3</sub><sup>+</sup>: 336.1262; found: 336.1263.

#### 44) 1,2-Diphenylhydrazine (**46**)<sup>[4]</sup>

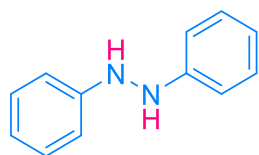

Prepared according to the general procedure from azobenzene (36.4 mg, 0.2 mmol) and (2-chlorophenyl)glycine (92.6 mg, 0.5 mmol, 2.5 equiv.). Purified by column chromatography on silica gel (PE: EtOAc = 200:1) to afford the pure product **46**.

White solid; yield: 12.9 mg (35%).

<sup>1</sup>H NMR (400 MHz, CDCl<sub>3</sub>): δ 7.22–7.13 (m, 4H), 7.02–6.95 (m, 4H), 6.84–6.76 (m, 2H), 5.39 (s, 2H).

<sup>13</sup>C NMR (150 MHz, CDCl<sub>3</sub>): δ 147.7, 129.1, 120.0, 114.1.

#### 45) *N*<sup>1</sup>,*N*<sup>2</sup>-Diphenylethane-1,2-diamine(**47**)<sup>[5]</sup>

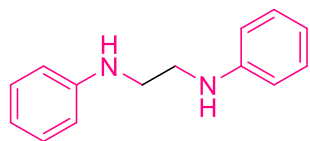

Prepared according to the general procedure from *N*-aryl glycine (75.6 mg, 0.5 mmol, 2.5 equiv.). Purified by column chromatography on silica gel (PE: EtOAc = 50:1) to afford the pure product **47**.

White solid; yield: 7.9 mg (15%).

<sup>1</sup>H NMR (400 MHz, CDCl<sub>3</sub>): δ 7.34–7.28 (m, 4H), 6.87–6.74 (m, 2H), 6.72–6.65 (m, 4H), 4.67 (s, 2H), 3.66 (s, 4H).

<sup>13</sup>C NMR (150 MHz, CDCl<sub>3</sub>): δ 146.4, 129.3, 117.6, 112.4, 46.5.

## 9. References

- [1] Zhang, C.; Jiao, N. *Angew. Chem. Int. Ed.* **2010**, *49*, 6174.
- [2] Lian, Y.; Bergman, R. G.; Lavis, L. D.; Ellman, J. A. *J. Am. Chem. Soc.* **2013**, *135*, 7122.
- [3] Matsui M.; Shibara, K. *J. Jpn. Soc. Colour Mater. (SHIKIZAI)*, **2001**, *74*, 607.
- [4] Song, M.; Zhou, H.; Wang, G.; Ma, B.; Jiang, Y.; Yang, J.; Huo, C.; Wang, X.-C. *J. Org. Chem.* **2021**, *86*, 4804.
- [5] Lavoie, C. M.; MacQueen, P. M.; Rotta-Loria, N. L.; Sawatzky, R. S.; Borzenko, A.; Chisholm, A. J.; Hargreaves, B. K. V.; McDonald, R.; Ferguson, M. J.; Stradiotto, M. *Nat. Commun.* **2016**, *7*, 11073.

## 10. Copy of NMR Spectra

$^1\text{H}$  NMR spectrum of **3** (400 MHz,  $\text{CDCl}_3$ ):

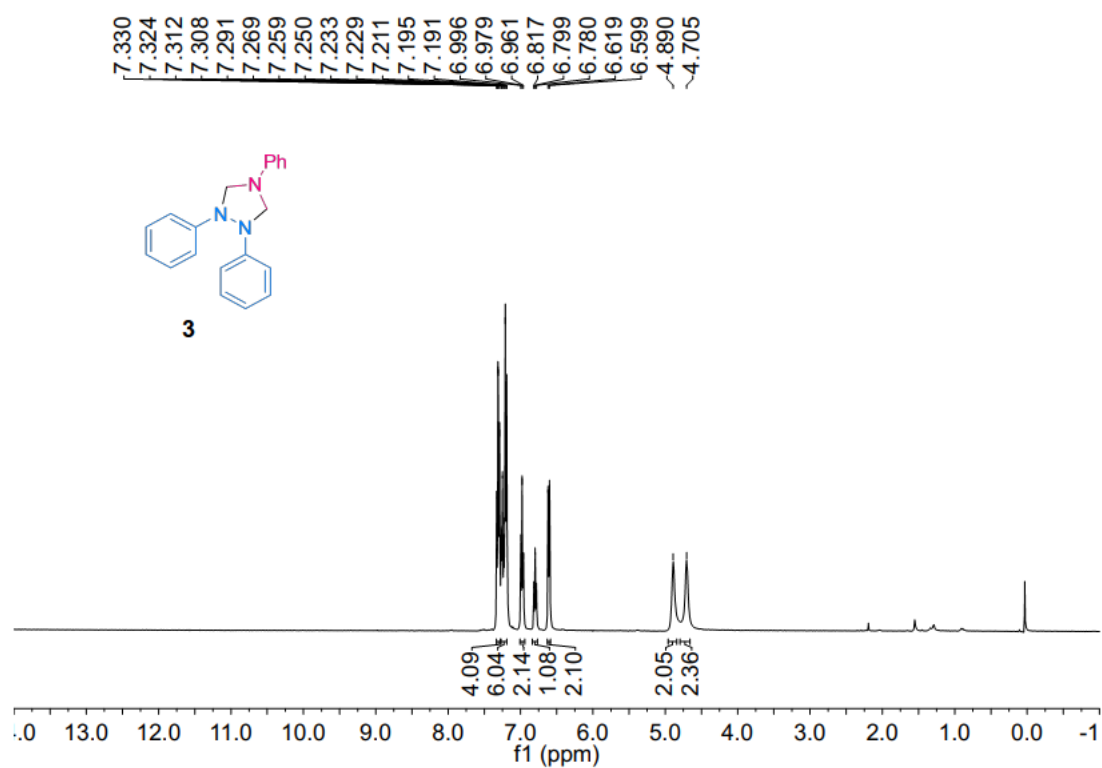

$^{13}\text{C}$  NMR spectrum of **3** (150 MHz,  $\text{CDCl}_3$ ):

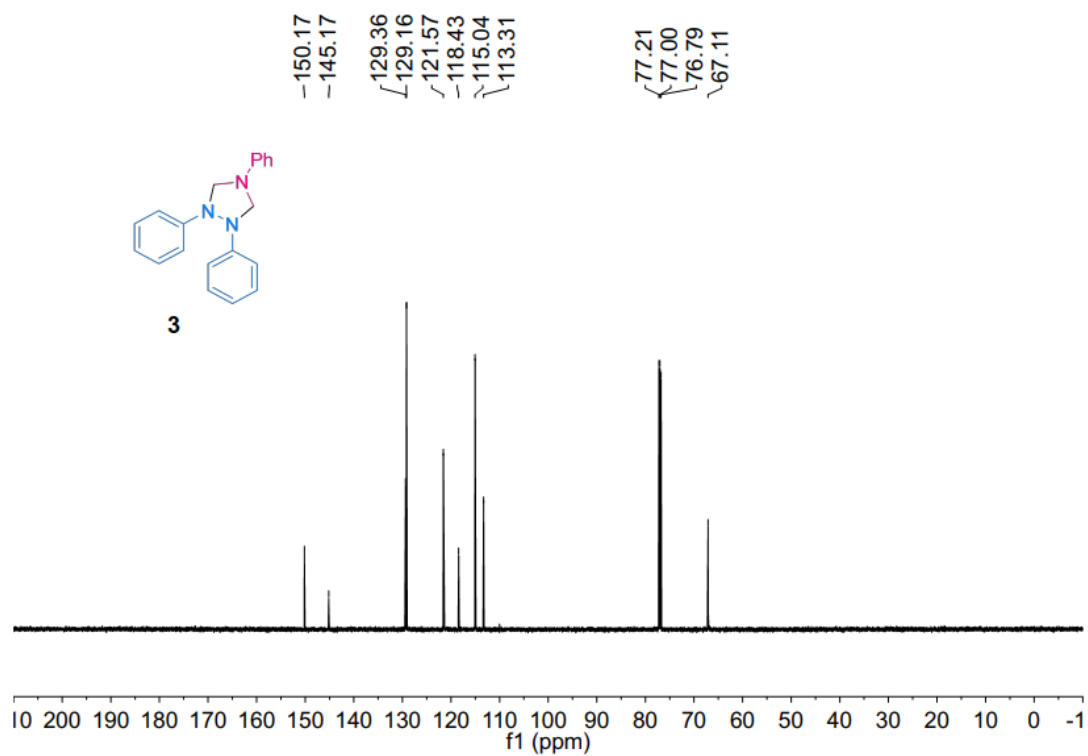

$^1\text{H}$  NMR spectrum of **4** (400 MHz,  $\text{CDCl}_3$ ):

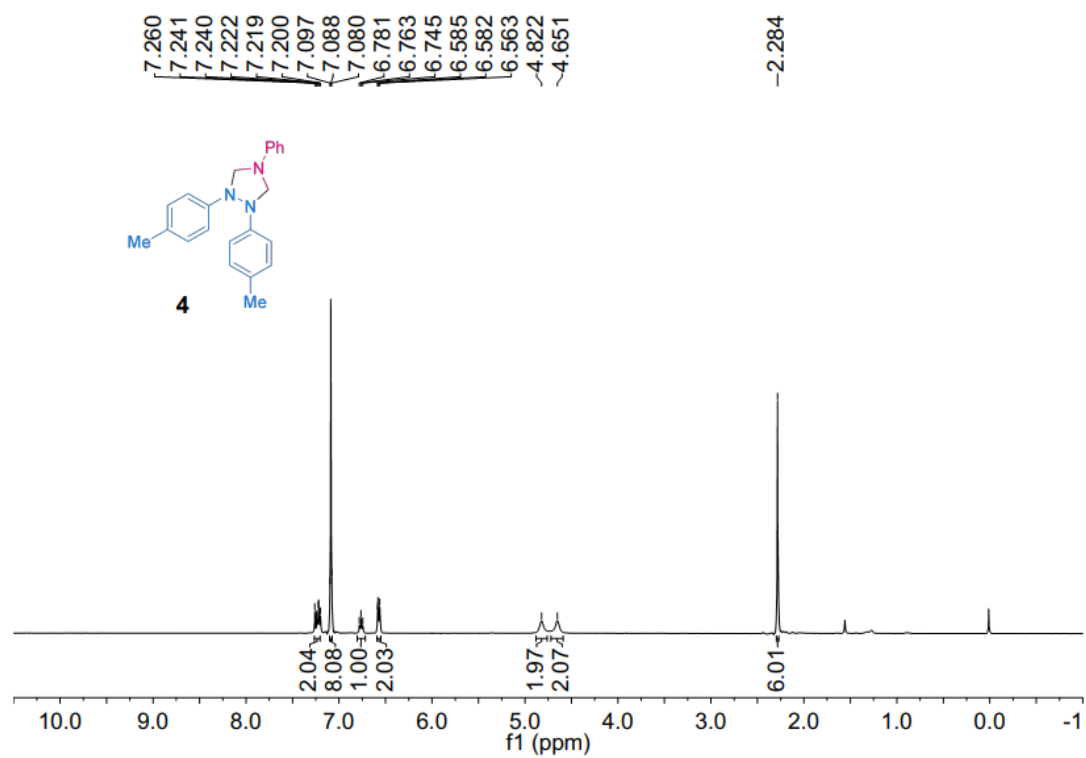

$^{13}\text{C}$  NMR spectrum of **4** (150 MHz,  $\text{CDCl}_3$ ):

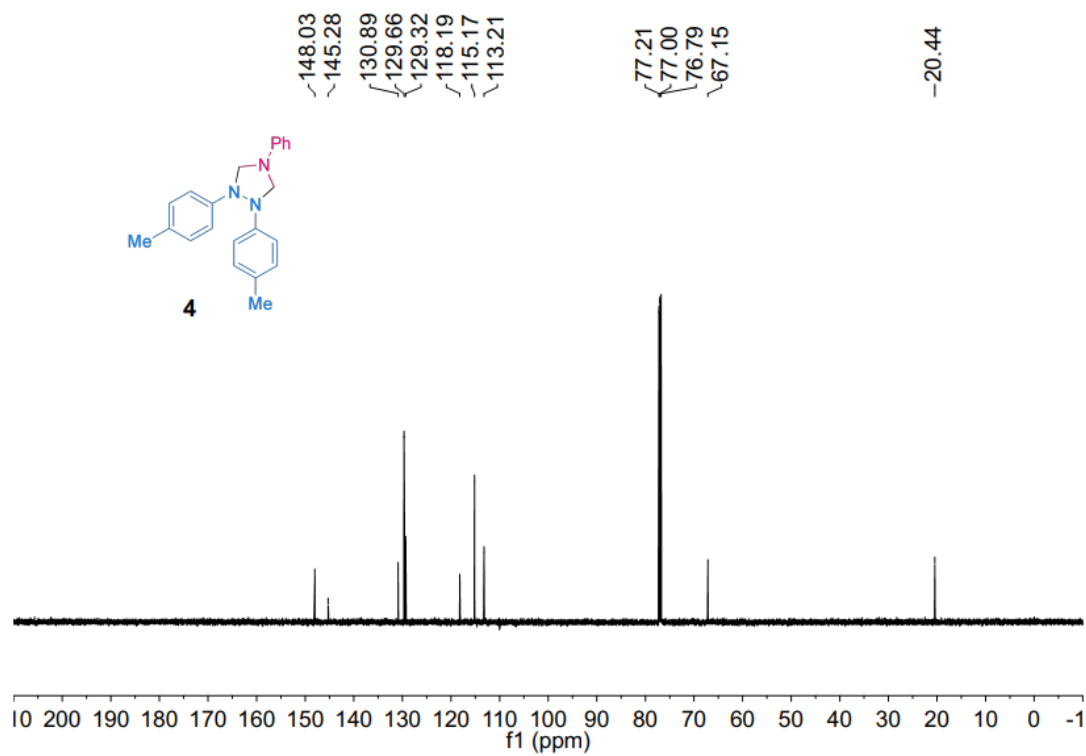



$^1\text{H}$  NMR spectrum of **5** (400 MHz,  $\text{CDCl}_3$ ):

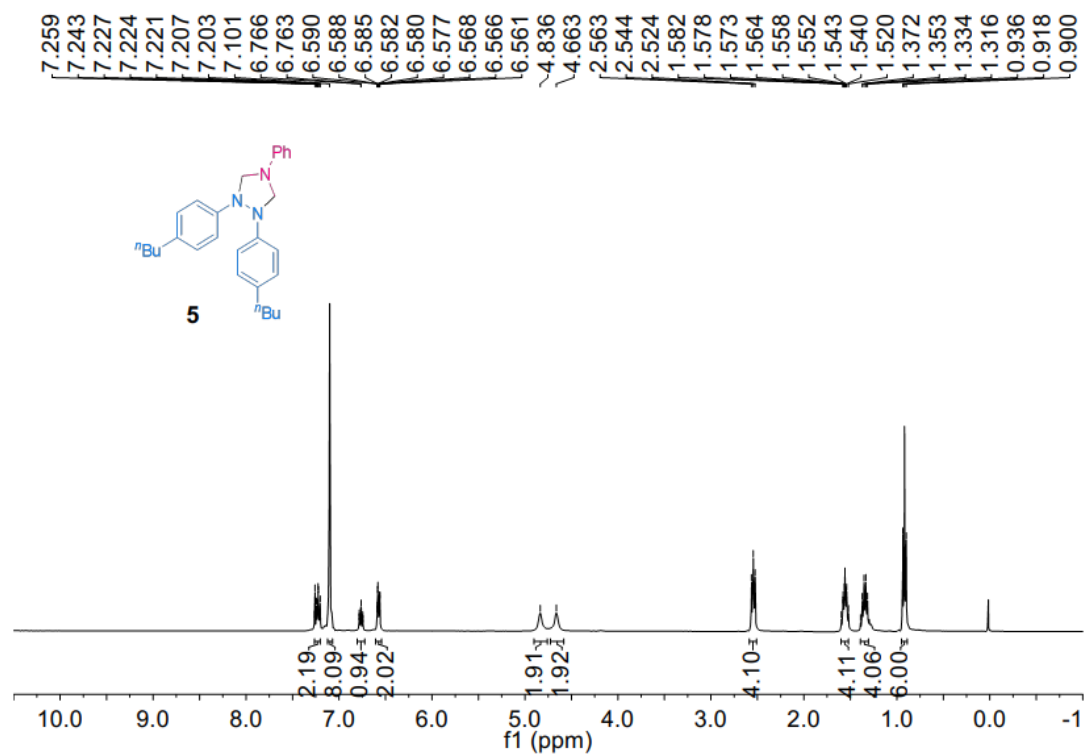

$^{13}\text{C}$  NMR spectrum of **5** (150 MHz,  $\text{CDCl}_3$ ):

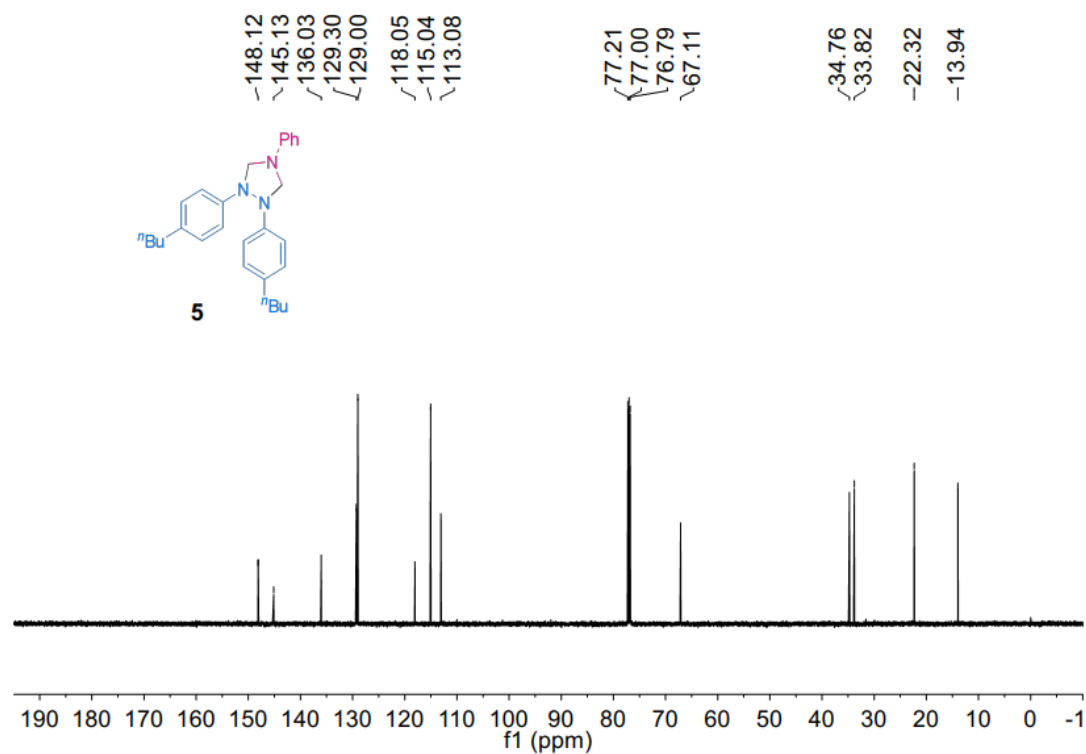

$^1\text{H}$  NMR spectrum of **6** (400 MHz,  $\text{CDCl}_3$ ):

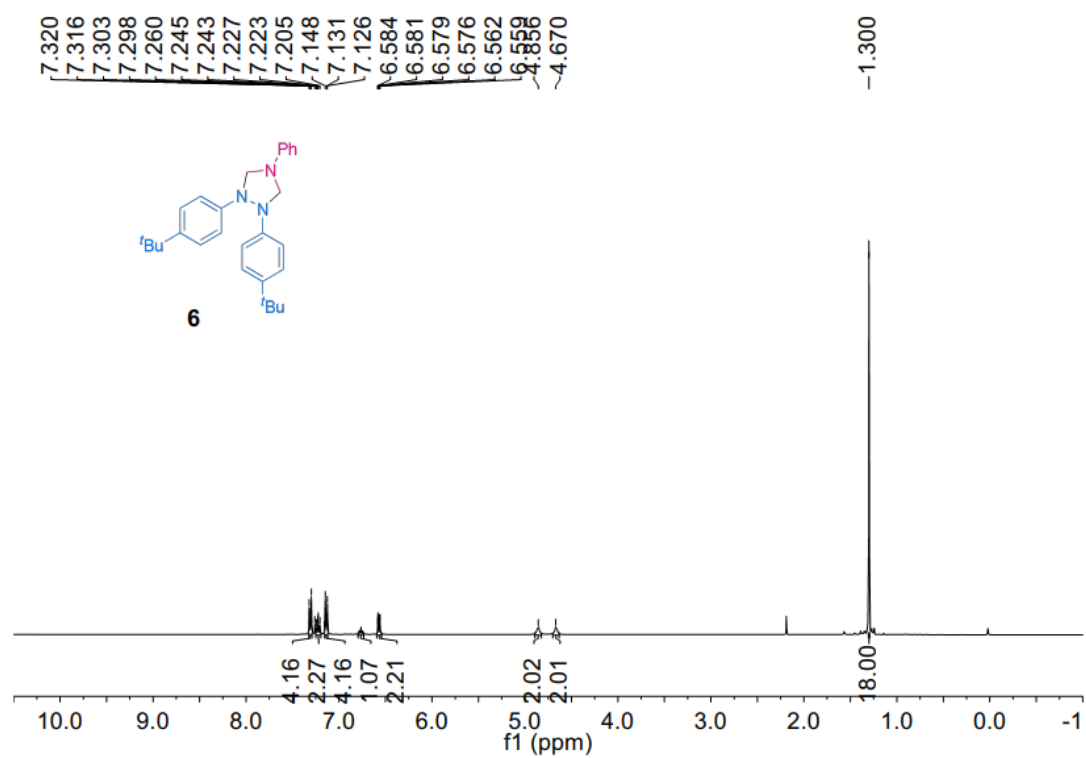

$^{13}\text{C}$  NMR spectrum of **6** (150 MHz,  $\text{CDCl}_3$ ):

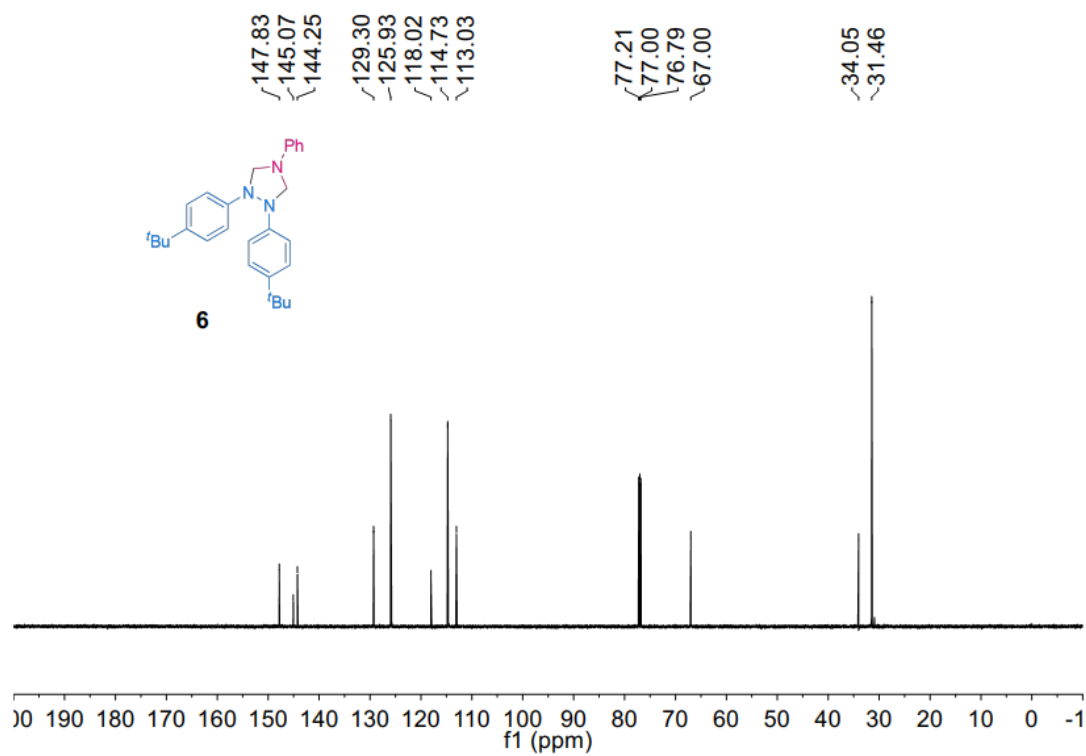

$^1\text{H}$  NMR spectrum of **7** (400 MHz,  $\text{CDCl}_3$ ):

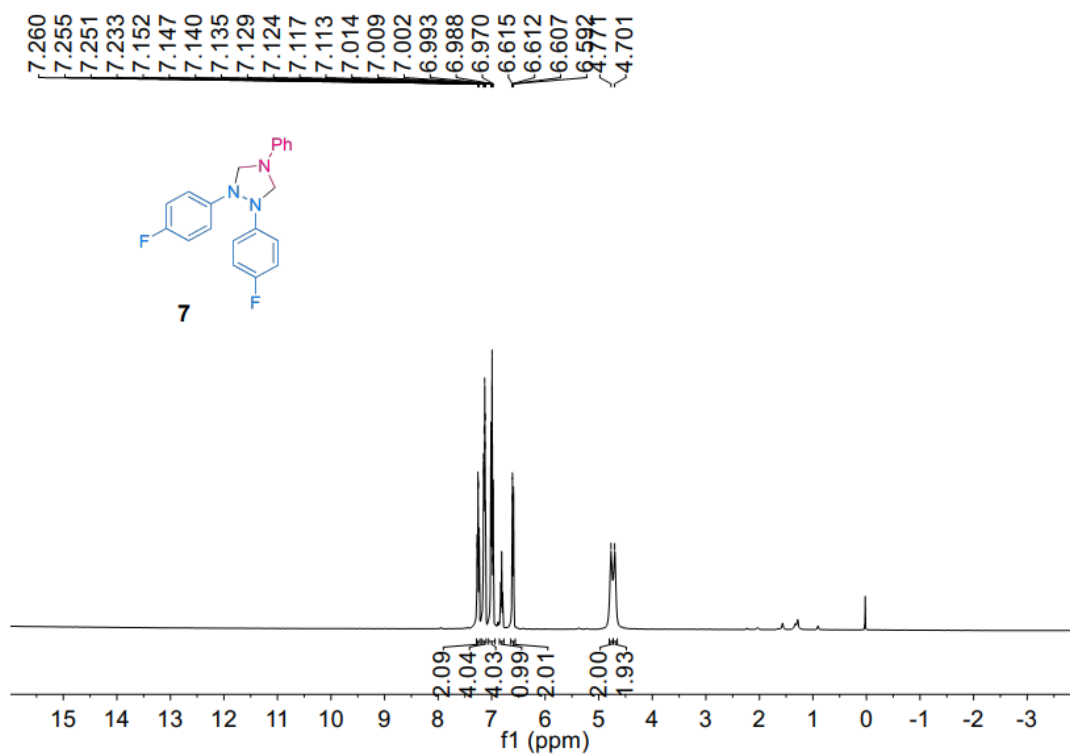

$^{13}\text{C}$  NMR spectrum of **7** (150 MHz,  $\text{CDCl}_3$ ):

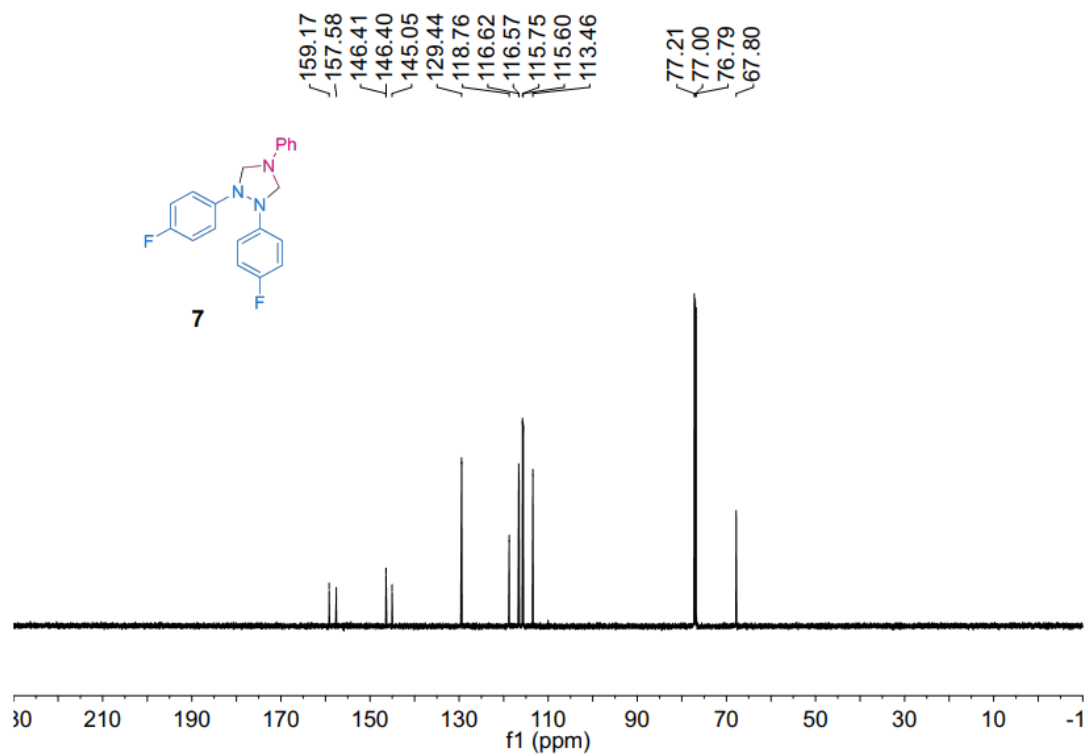

$^{19}\text{F}$  NMR spectrum of **7** (376 MHz,  $\text{CDCl}_3$ ):

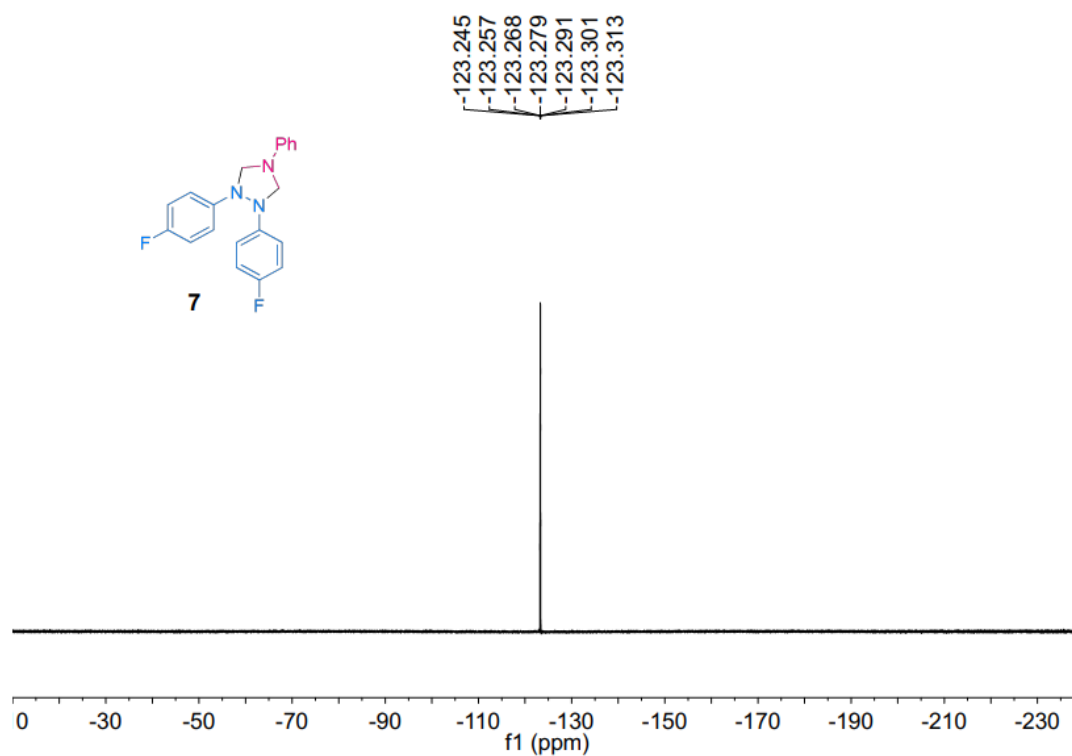

$^1\text{H}$  NMR spectrum of **8** (400 MHz,  $\text{CDCl}_3$ ):

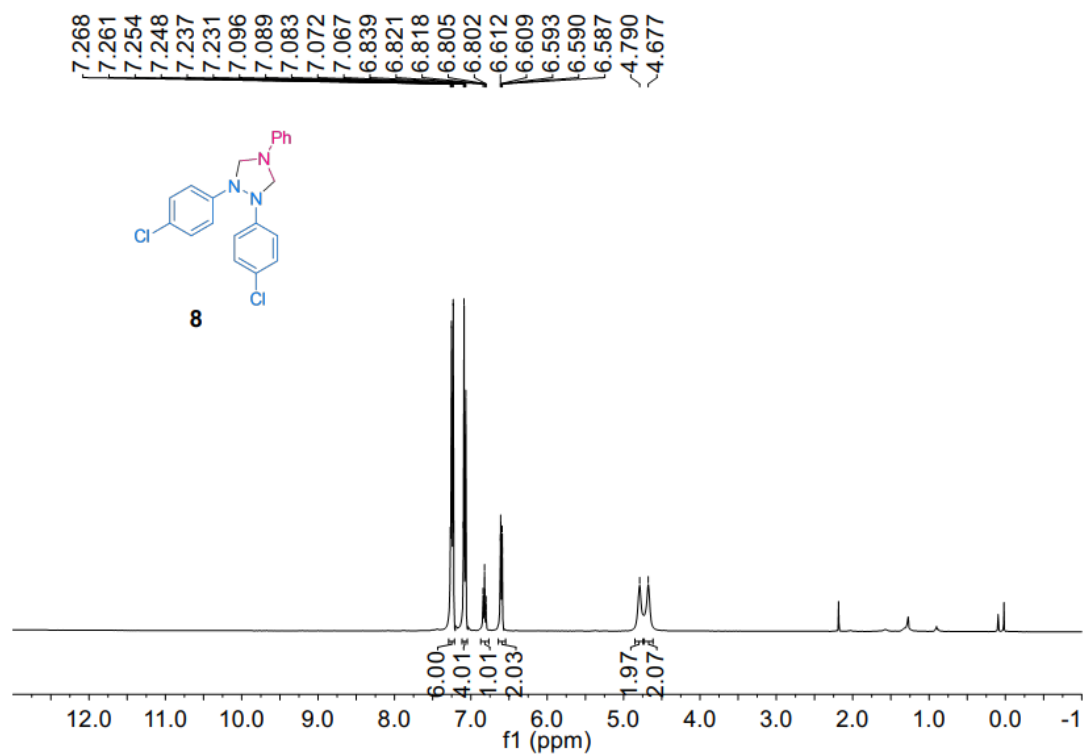

$^{13}\text{C}$  NMR spectrum of **8** (150 MHz,  $\text{CDCl}_3$ ):

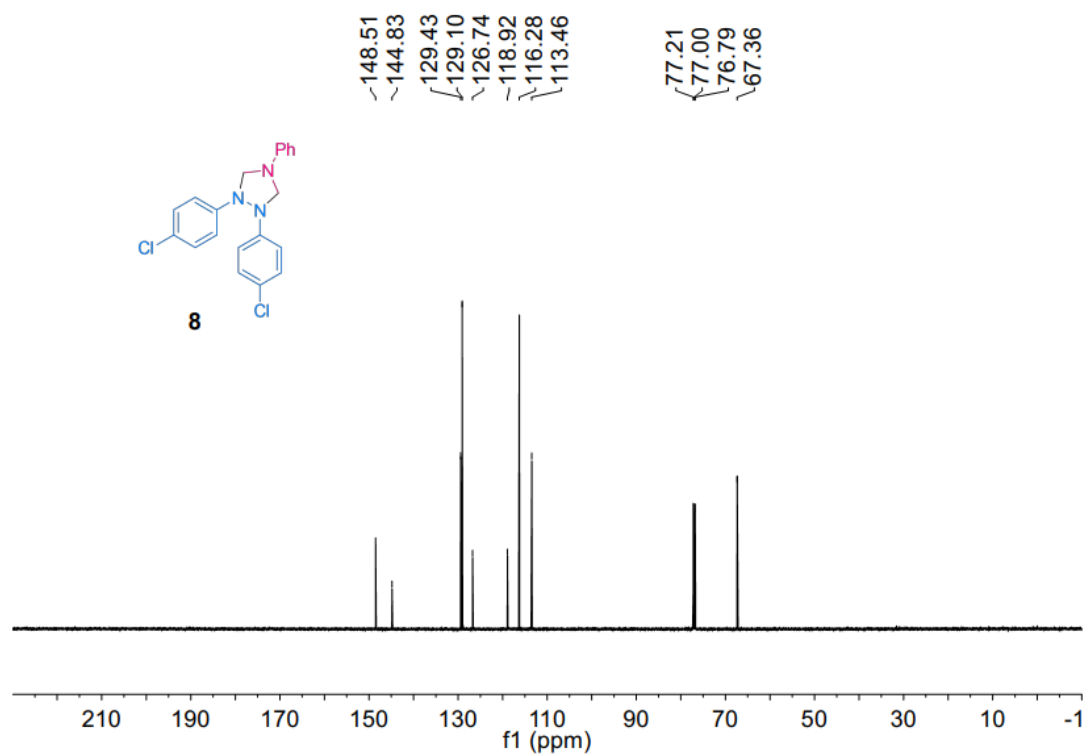

$^1\text{H}$  NMR spectrum of **9** (400 MHz,  $\text{CDCl}_3$ ):

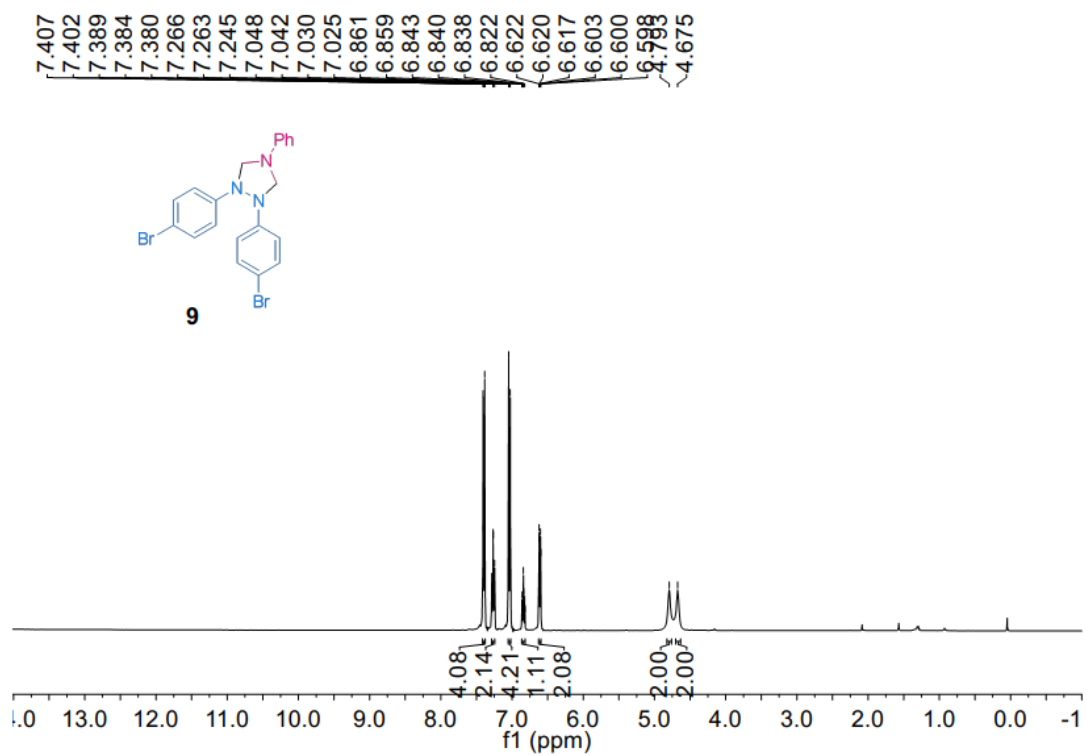

$^{13}\text{C}$  NMR spectrum of **9** (150 MHz,  $\text{CDCl}_3$ ):

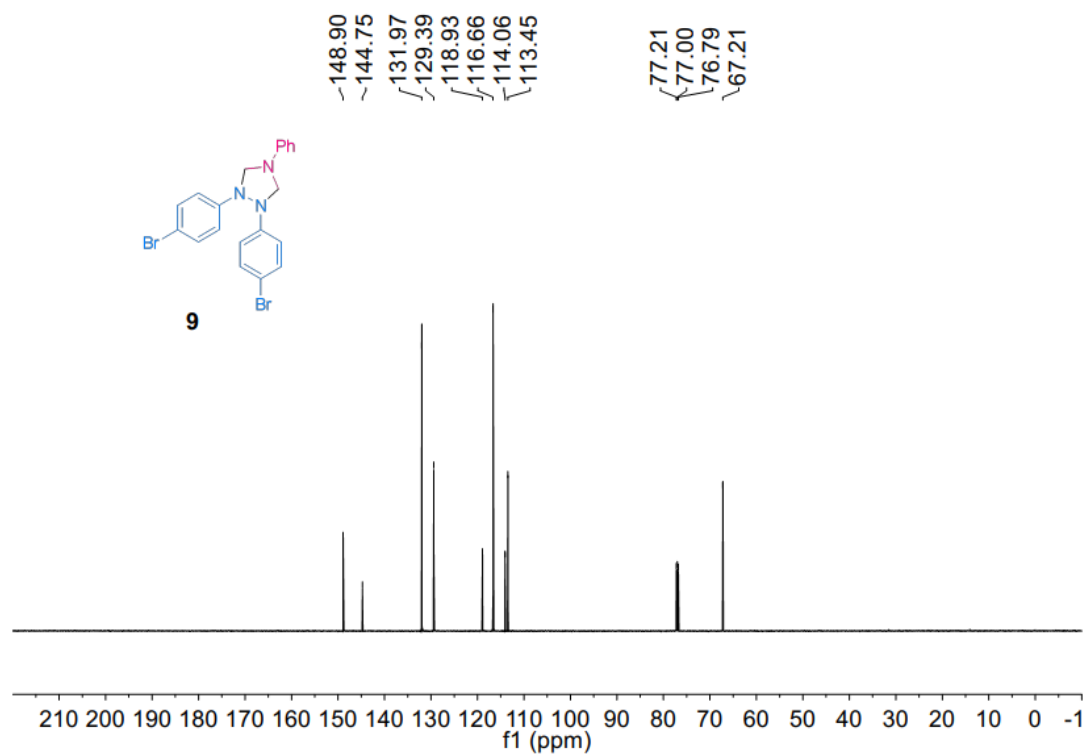

$^1\text{H}$  NMR spectrum of **10** (400 MHz,  $\text{CDCl}_3$ ):

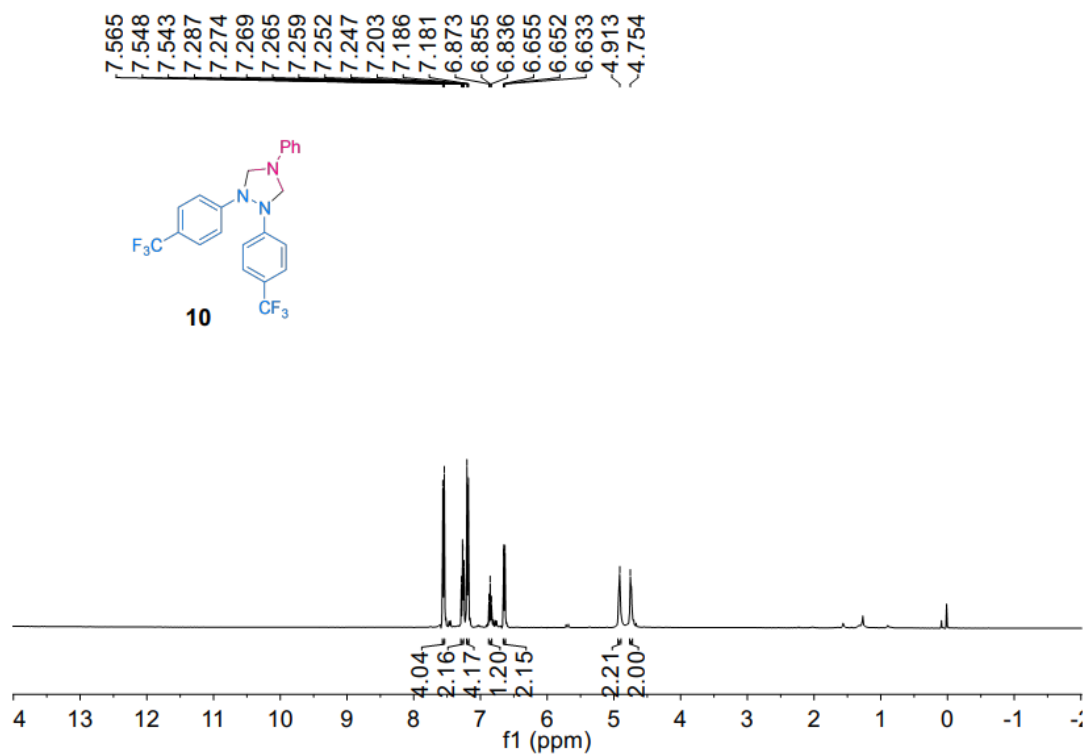

$^{13}\text{C}$  NMR spectrum of **10** (150 MHz,  $\text{CDCl}_3$ ):

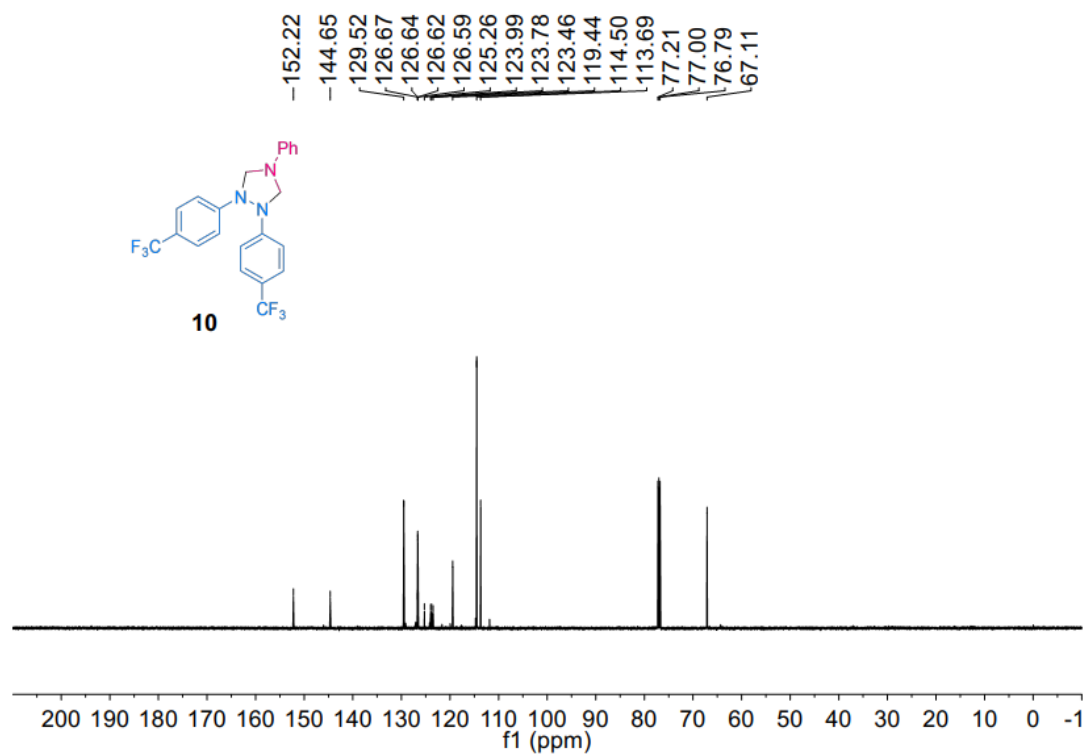

$^{19}\text{F}$  NMR spectrum of **10** (376 MHz,  $\text{CDCl}_3$ ):

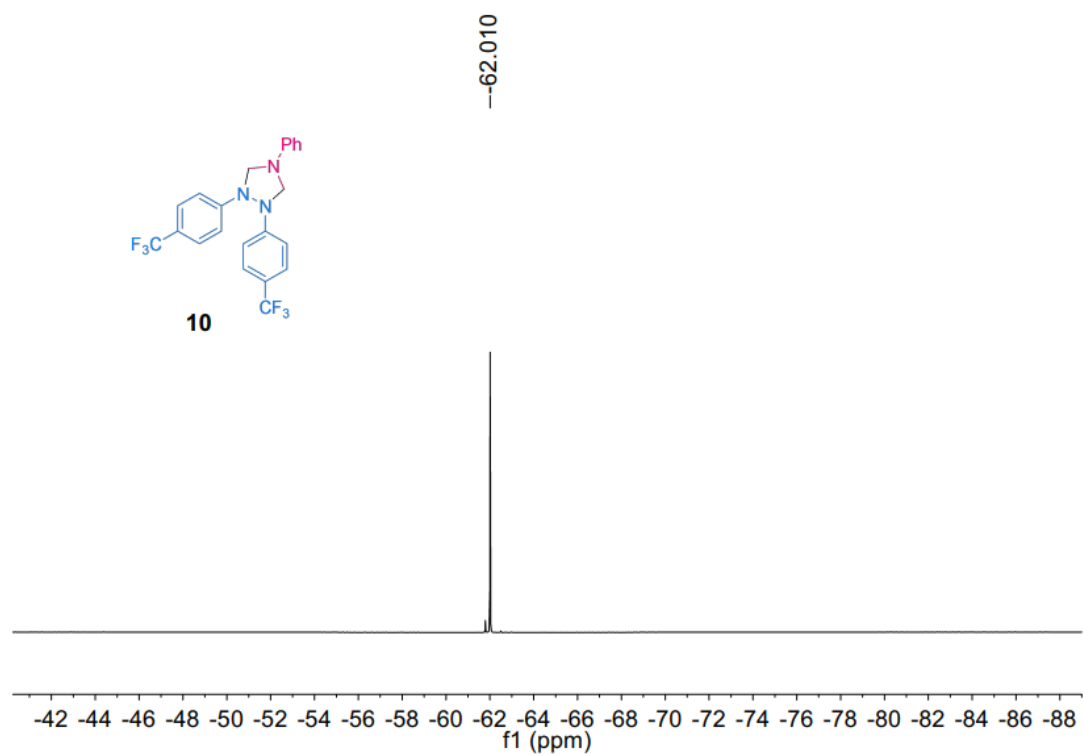

$^1\text{H}$  NMR spectrum of **11** (400 MHz,  $\text{CDCl}_3$ ):

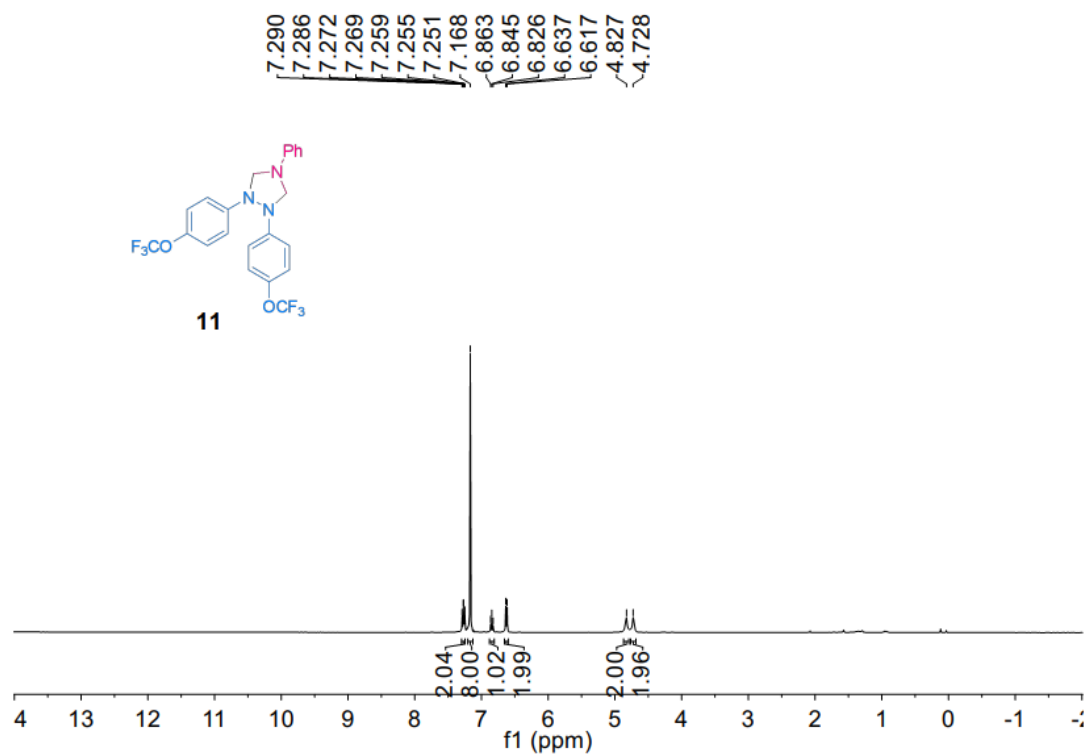

$^{13}\text{C}$  NMR spectrum of **11** (150 MHz,  $\text{CDCl}_3$ ):

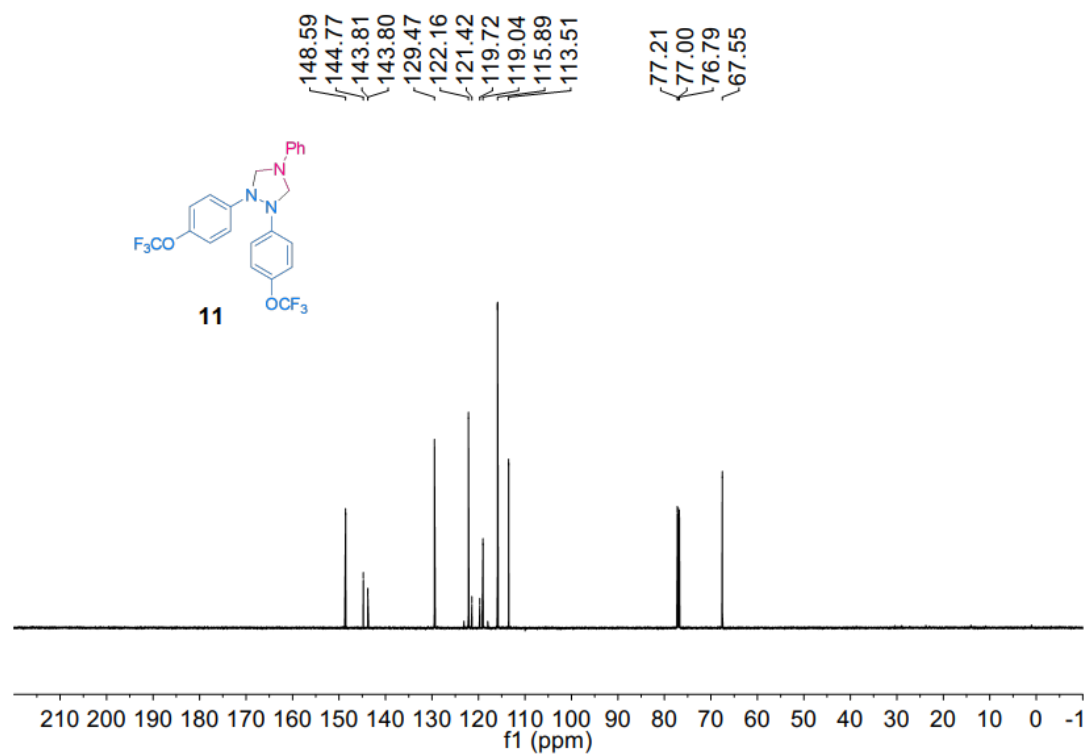



$^{19}\text{F}$  NMR spectrum of **11** (376 MHz,  $\text{CDCl}_3$ ):

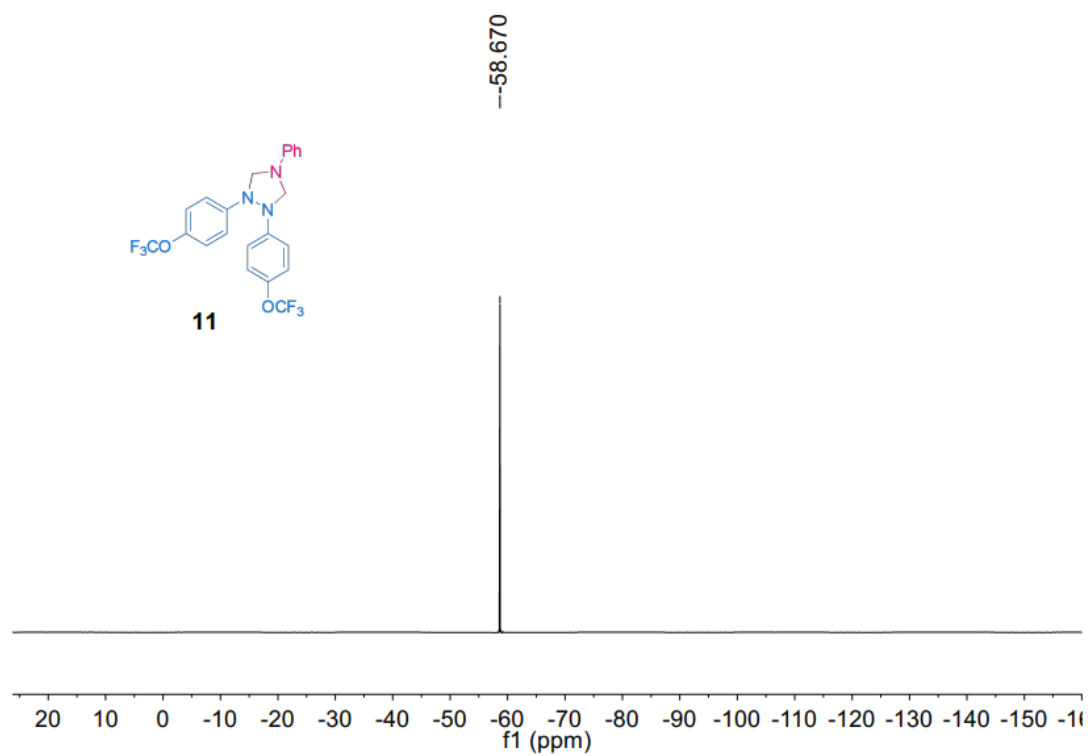

$^1\text{H}$  NMR spectrum of **12** (400 MHz,  $\text{CDCl}_3$ ):

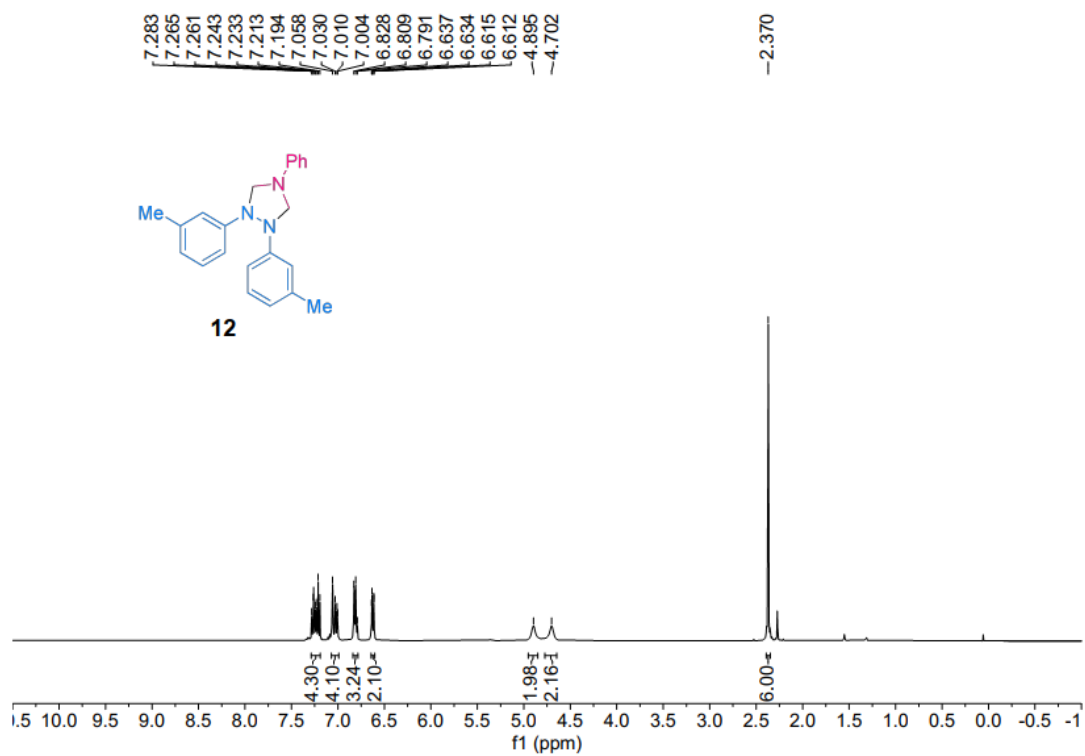

$^{13}\text{C}$  NMR spectrum of **12** (100 MHz,  $\text{CDCl}_3$ ):

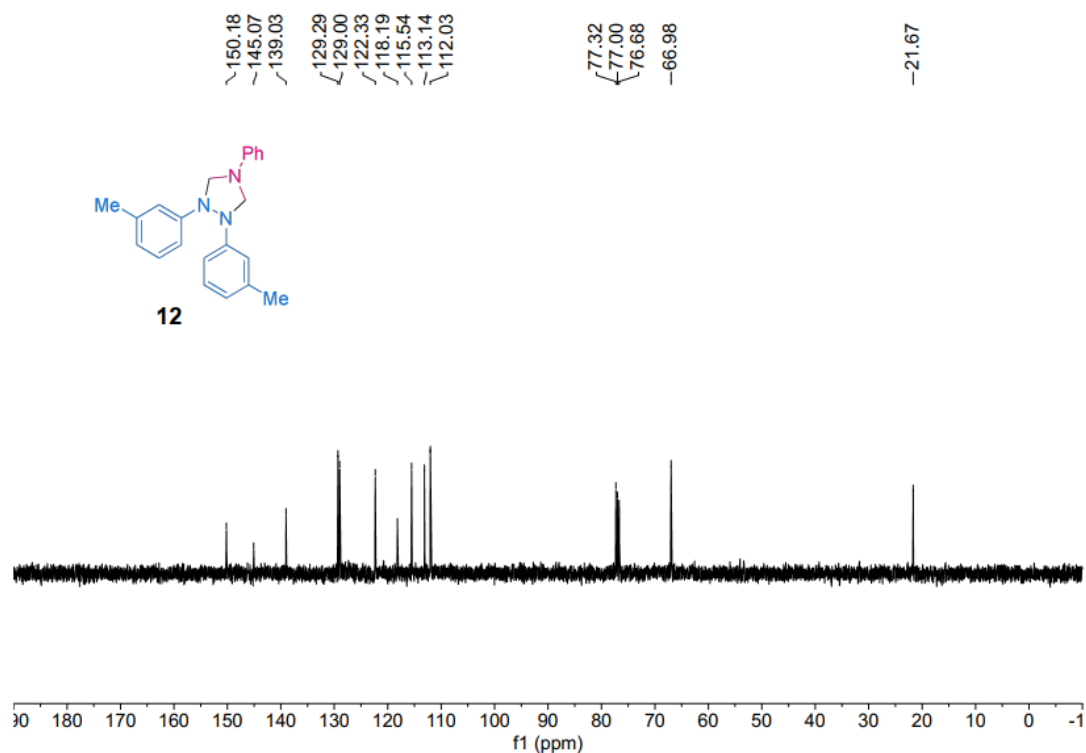

$^1\text{H}$  NMR spectrum of **13** (400 MHz,  $\text{CDCl}_3$ ):

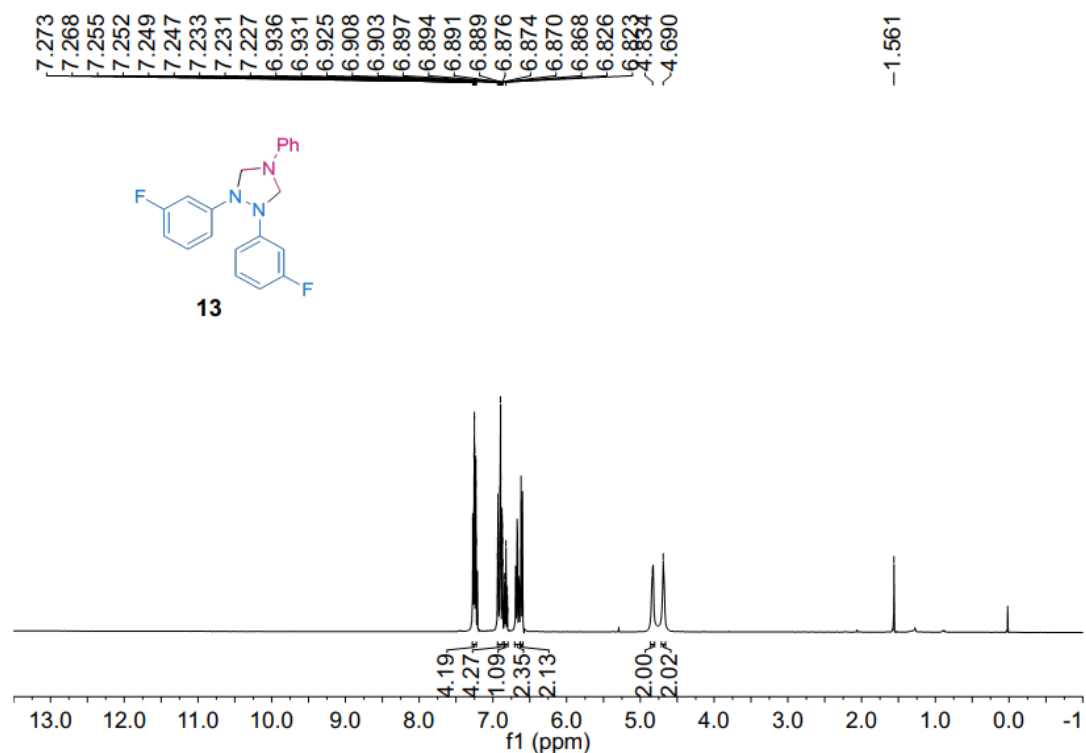

$^{13}\text{C}$  NMR spectrum of **13** (150 MHz,  $\text{CDCl}_3$ ):

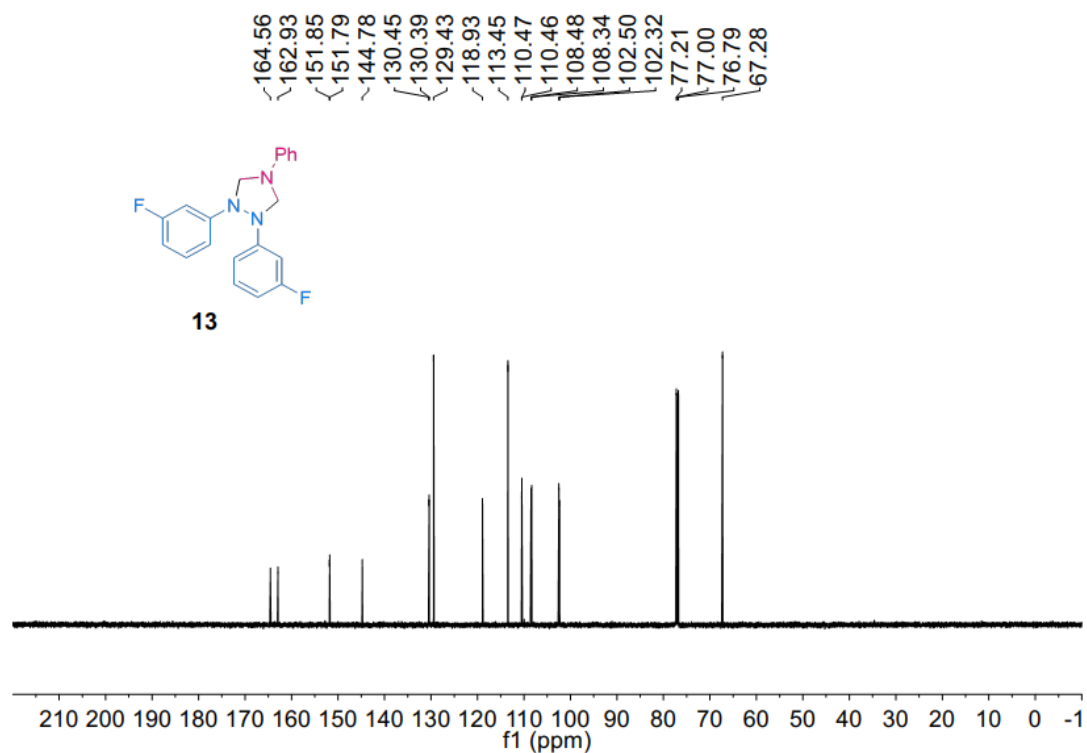

$^{19}\text{F}$  NMR spectrum of **13** (376 MHz,  $\text{CDCl}_3$ ):

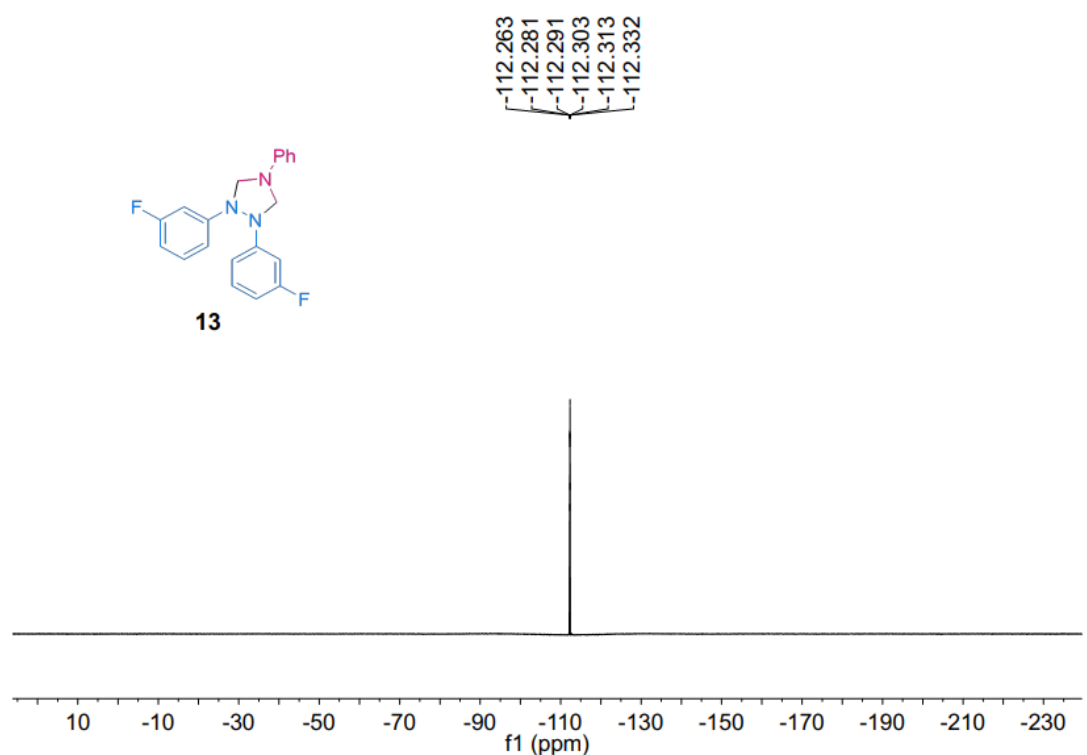

$^1\text{H}$  NMR spectrum of **14** (400 MHz,  $\text{CDCl}_3$ ):

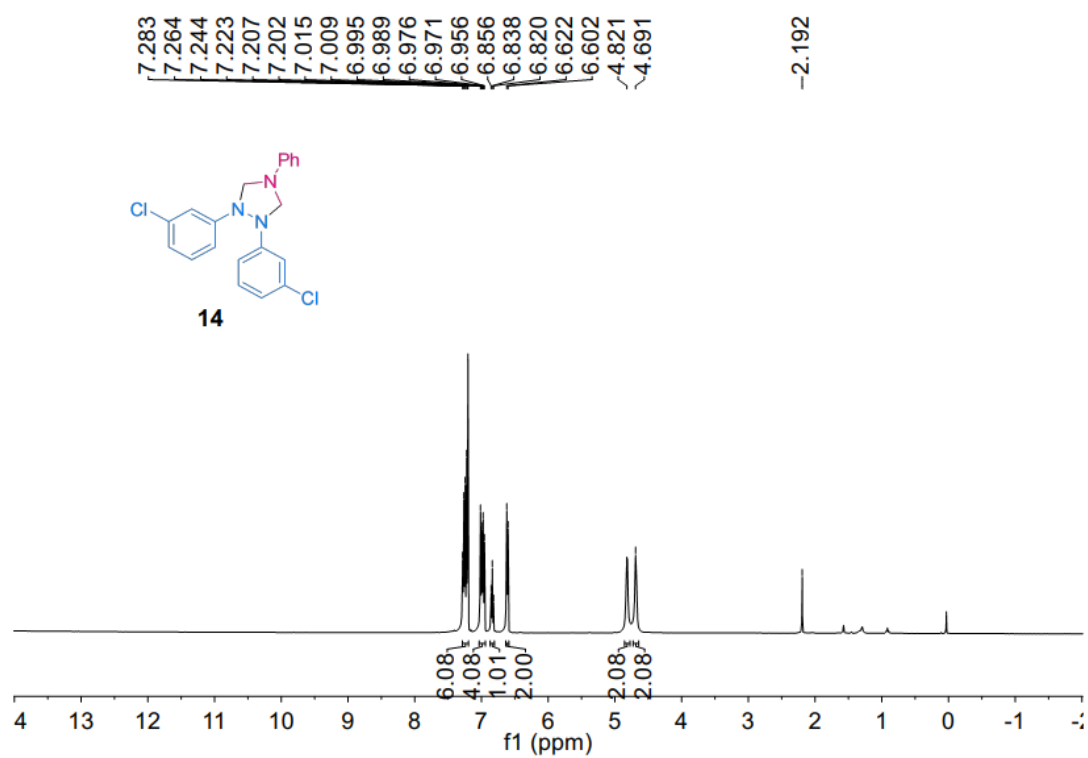

$^{13}\text{C}$  NMR spectrum of **14** (150 MHz,  $\text{CDCl}_3$ ):

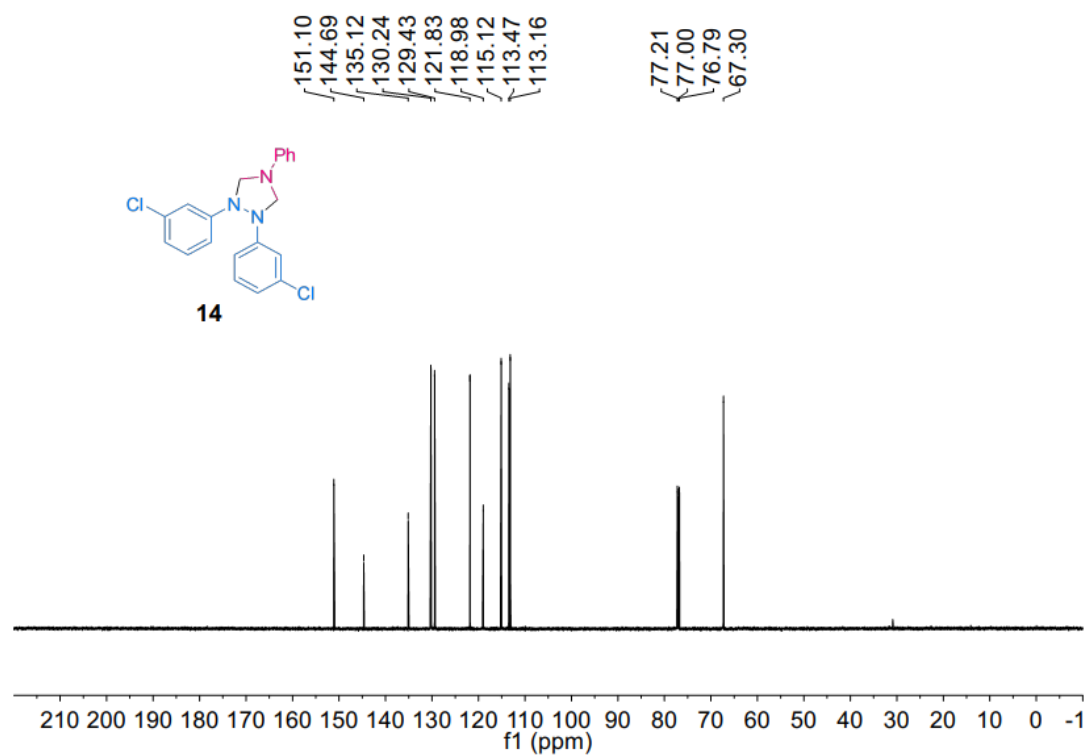

$^1\text{H}$  NMR spectrum of **15** (400 MHz,  $\text{CDCl}_3$ ):

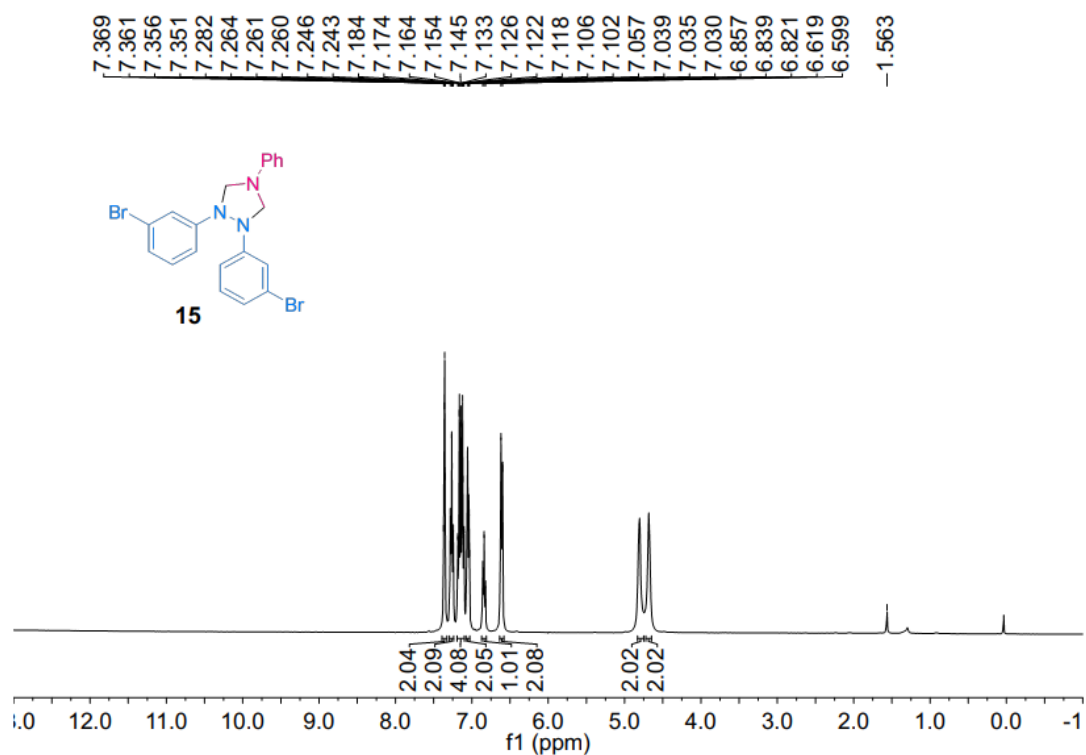

$^{13}\text{C}$  NMR spectrum of **15** (150 MHz,  $\text{CDCl}_3$ ):

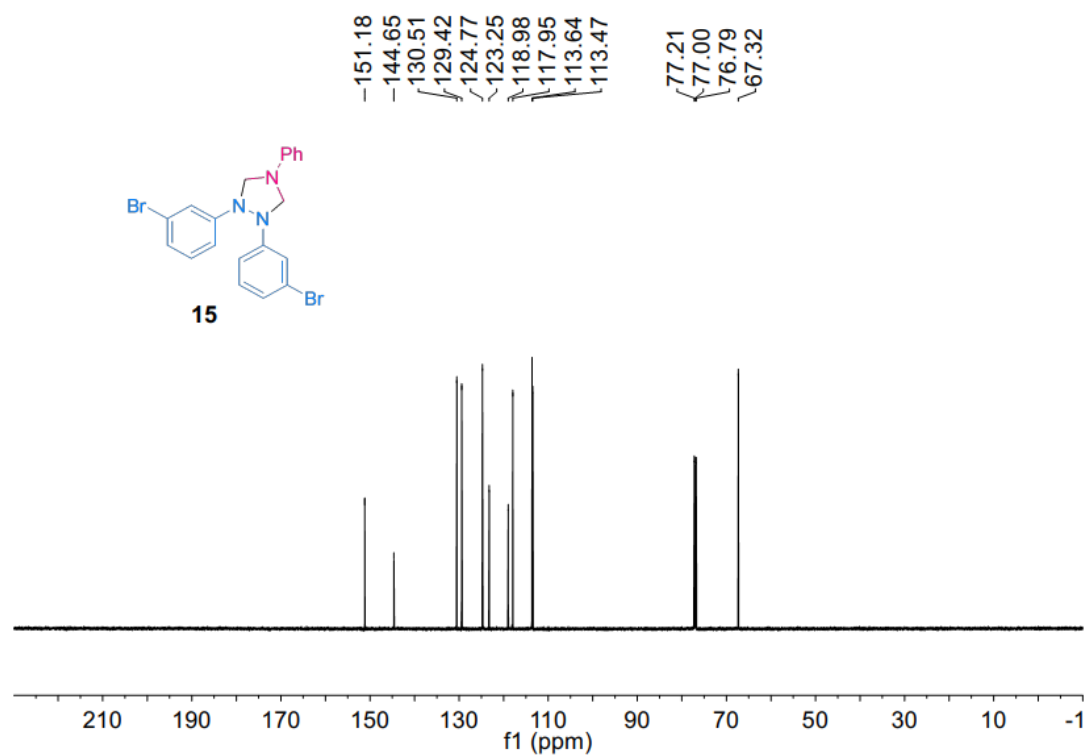

$^1\text{H}$  NMR spectrum of **16** (400 MHz,  $\text{CDCl}_3$ ):

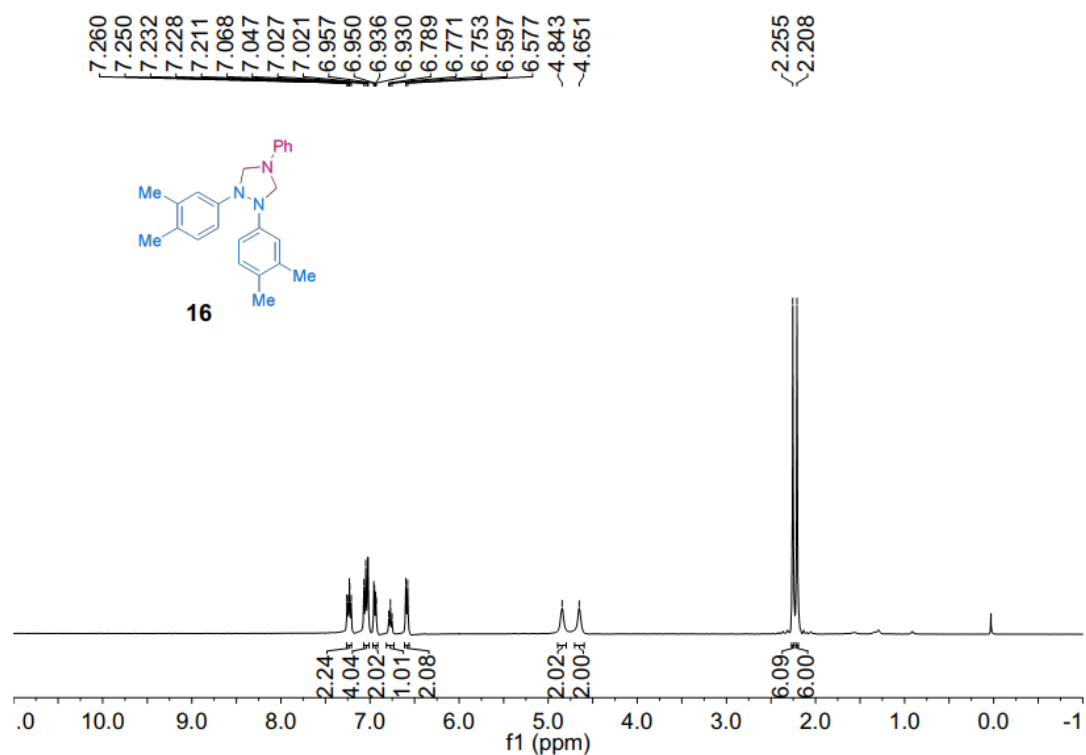

$^{13}\text{C}$  NMR spectrum of **16** (150 MHz,  $\text{CDCl}_3$ ):

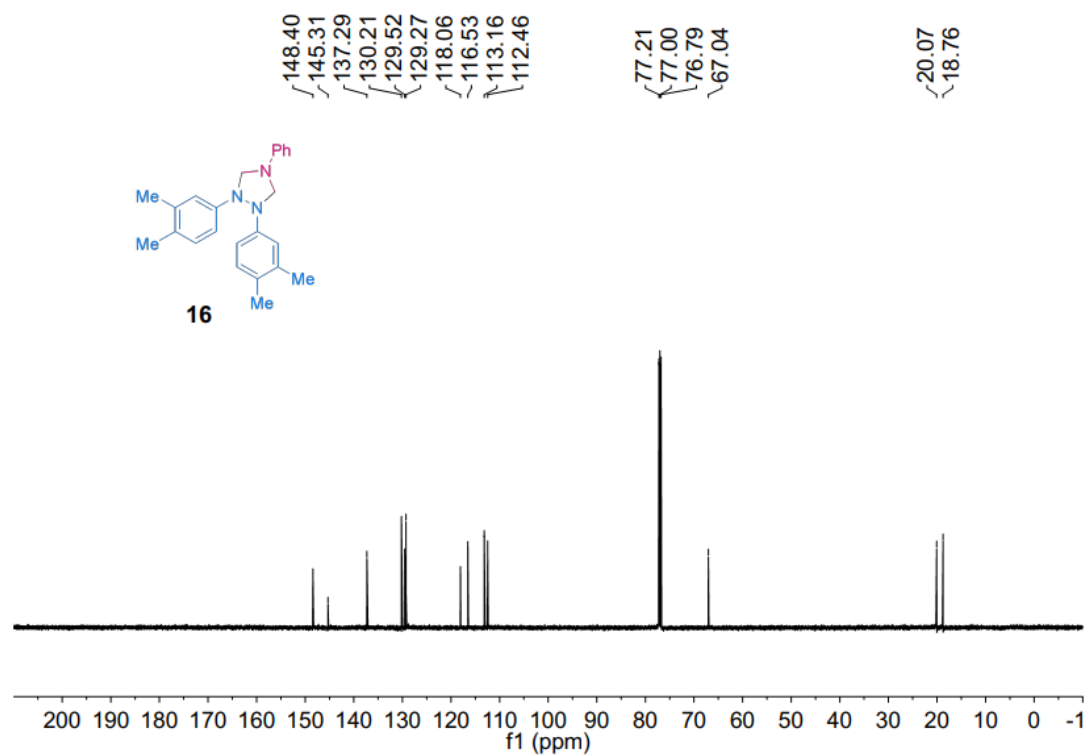

$^1\text{H}$  NMR spectrum of **17** (400 MHz,  $\text{CDCl}_3$ ):

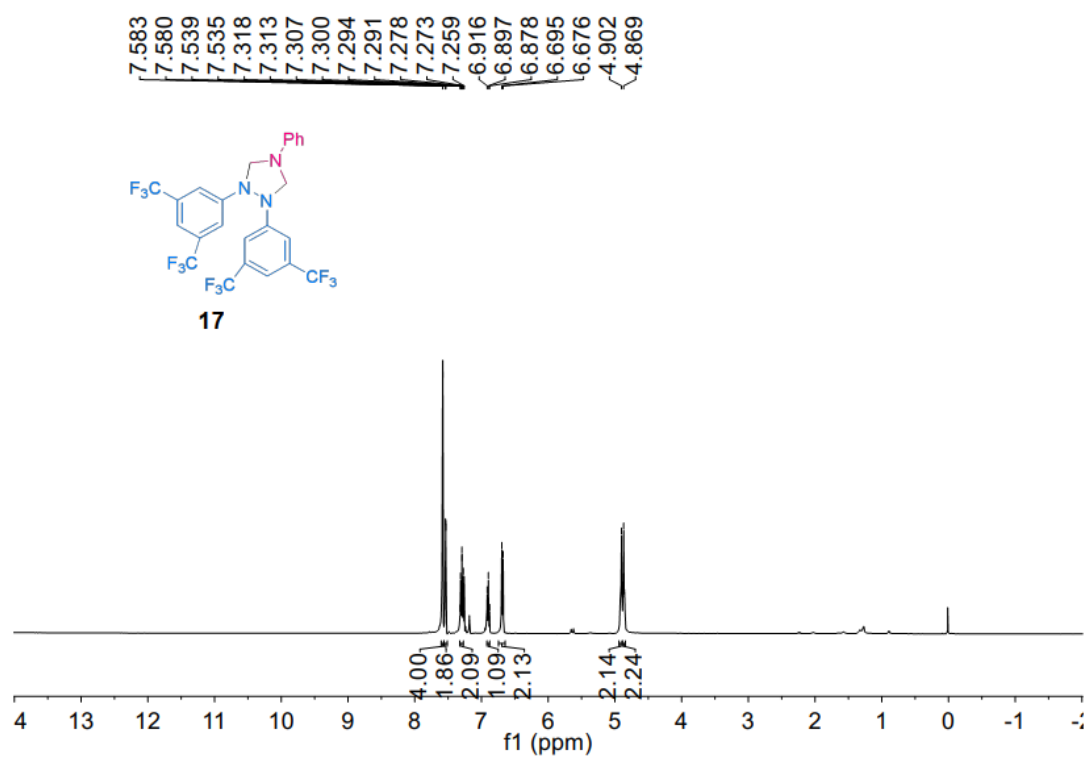

$^{13}\text{C}$  NMR spectrum of **17** (150 MHz,  $\text{CDCl}_3$ ):

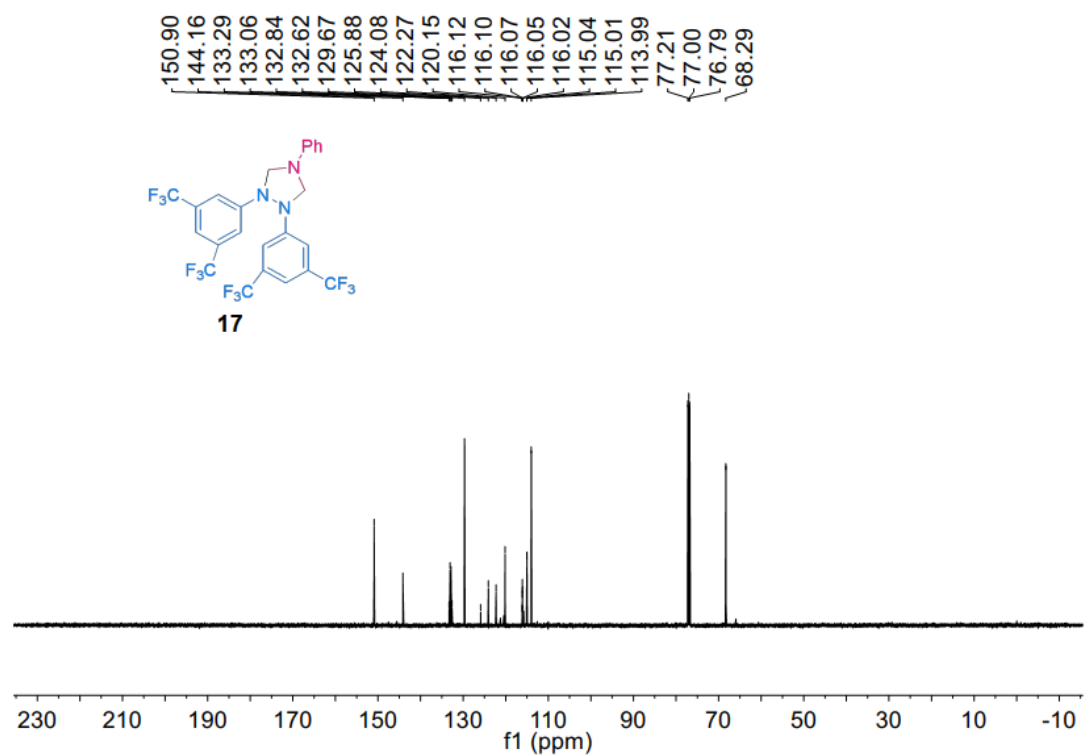

$^{19}\text{F}$  NMR spectrum of **17** (376 MHz,  $\text{CDCl}_3$ ):

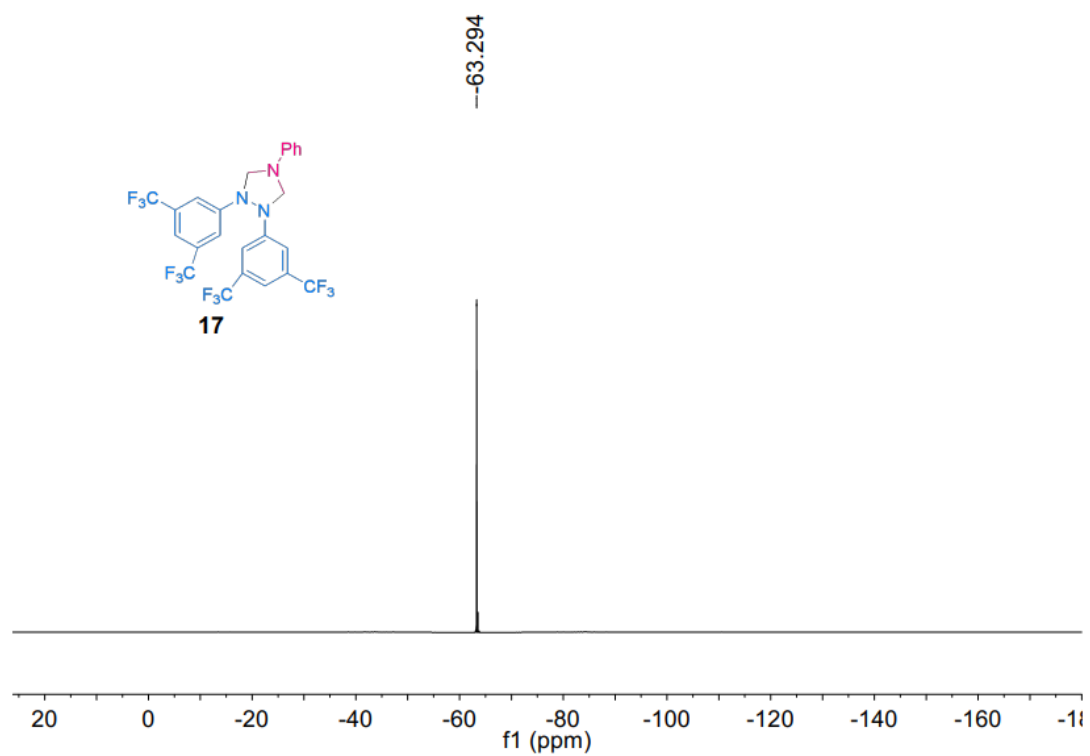

$^1\text{H}$  NMR spectrum of **18** (400 MHz,  $\text{CDCl}_3$ ):

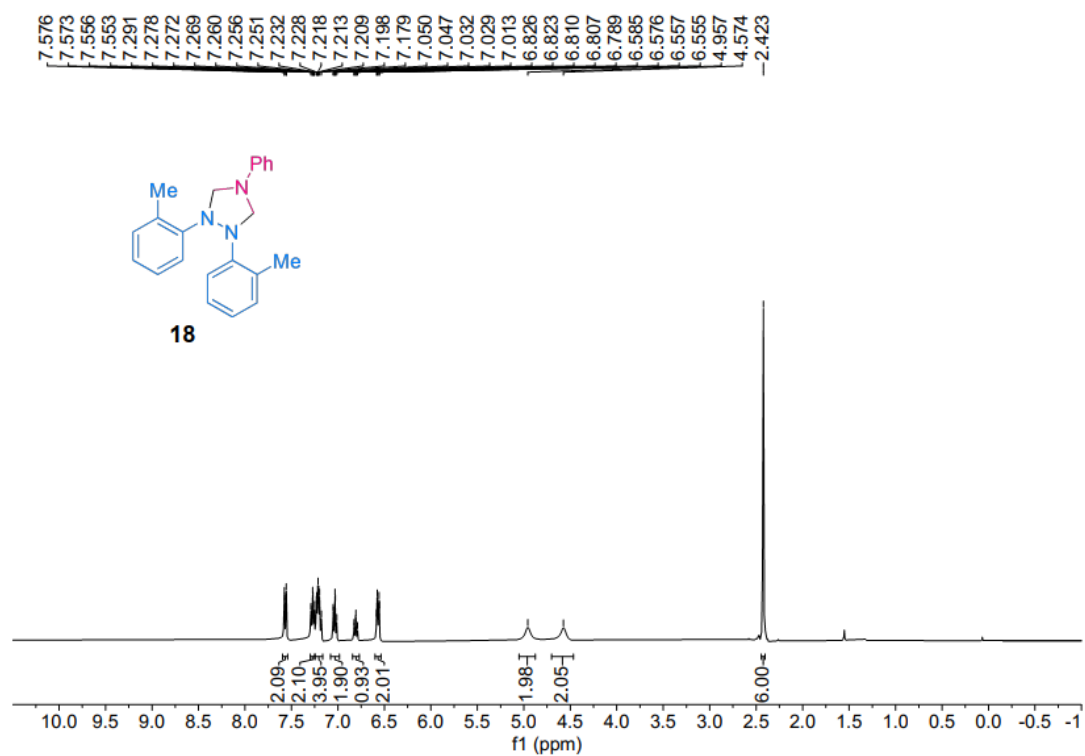



$^{13}\text{C}$  NMR spectrum of **18** (150 MHz,  $\text{CDCl}_3$ ):

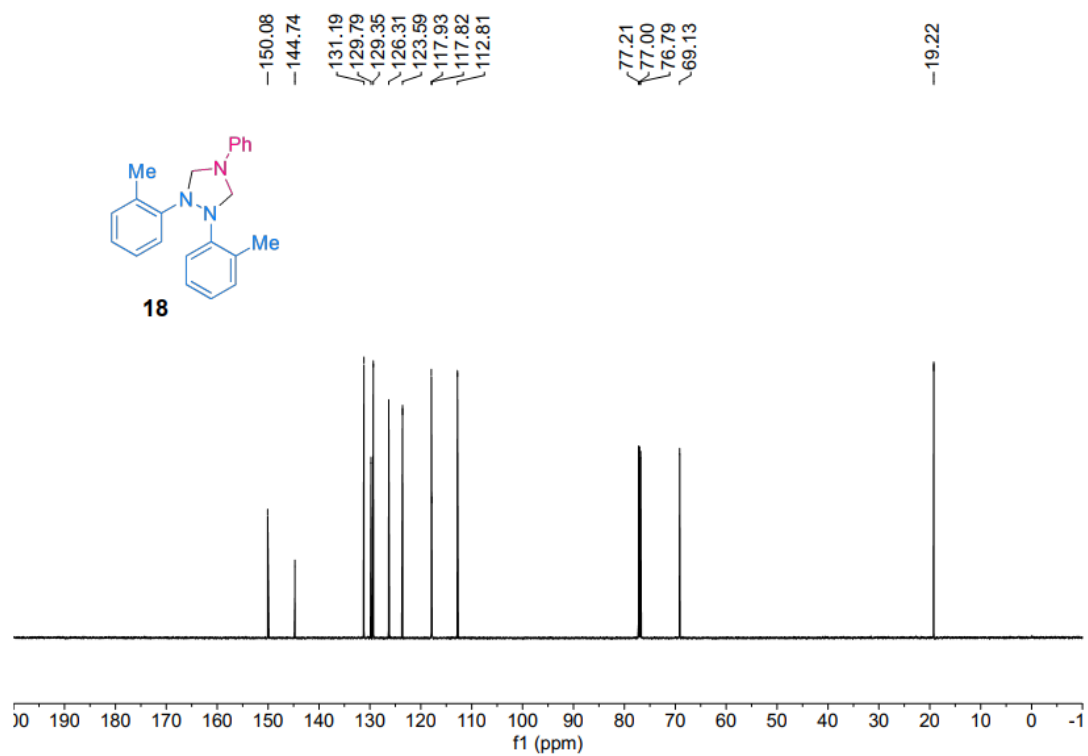

$^1\text{H}$  NMR spectrum of **19** (400 MHz,  $\text{CDCl}_3$ ):

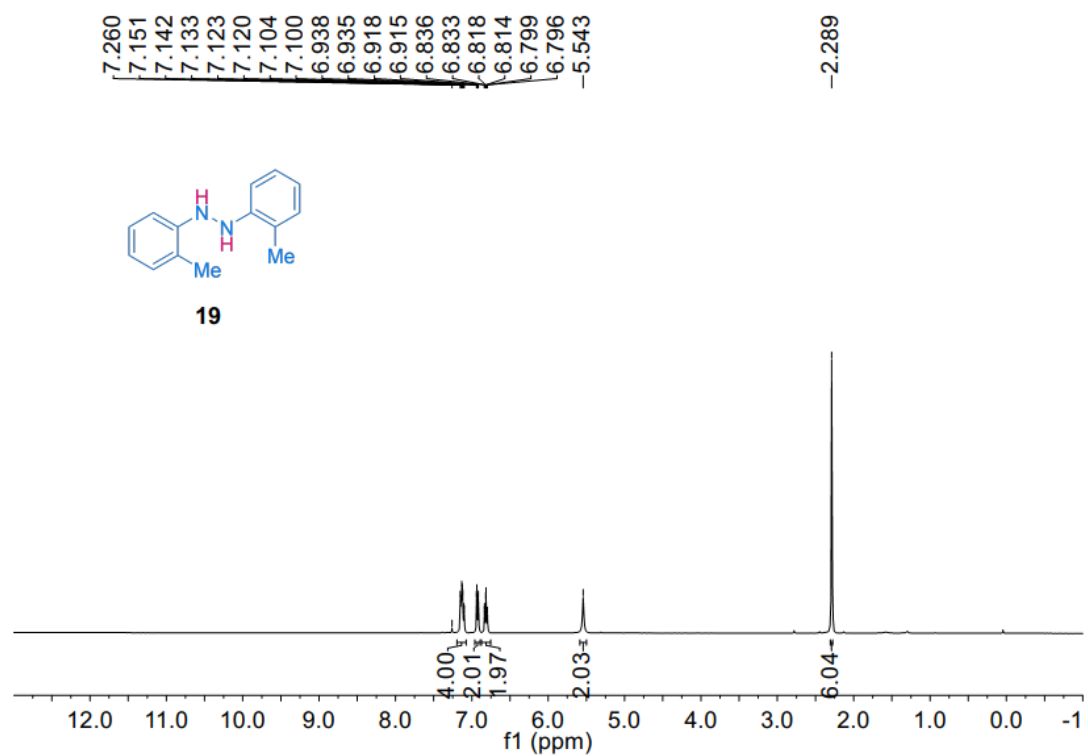

$^{13}\text{C}$  NMR spectrum of **19** (150 MHz,  $\text{CDCl}_3$ ):

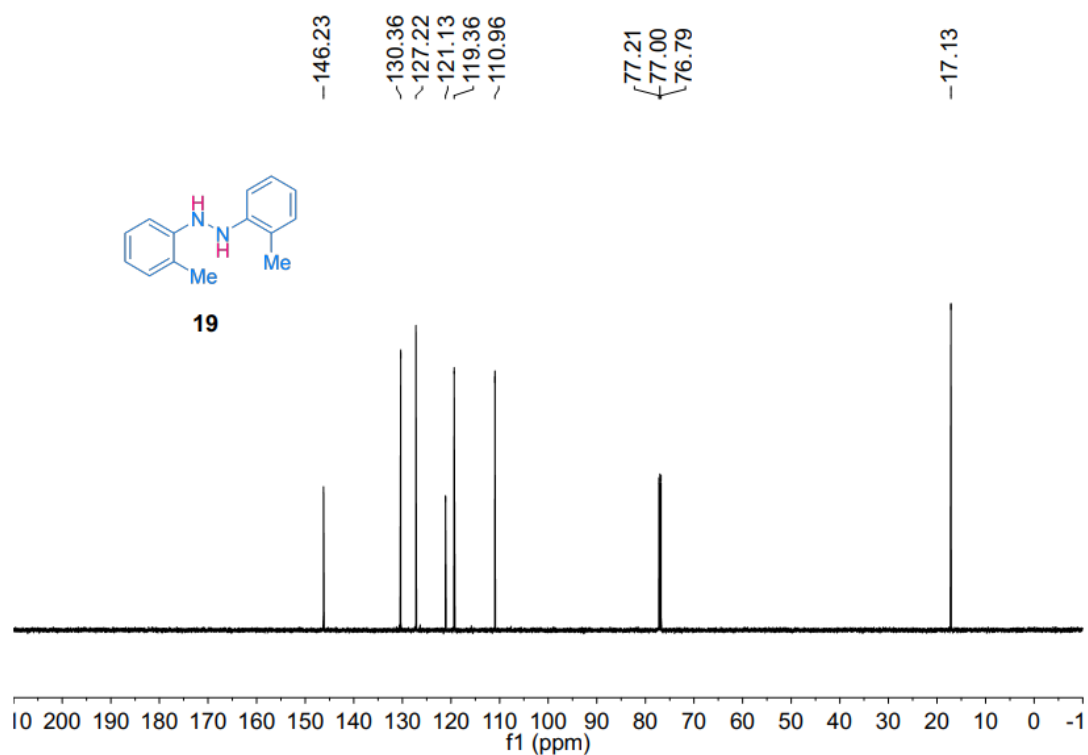

$^1\text{H}$  NMR spectrum of **20** (400 MHz,  $\text{CDCl}_3$ ):

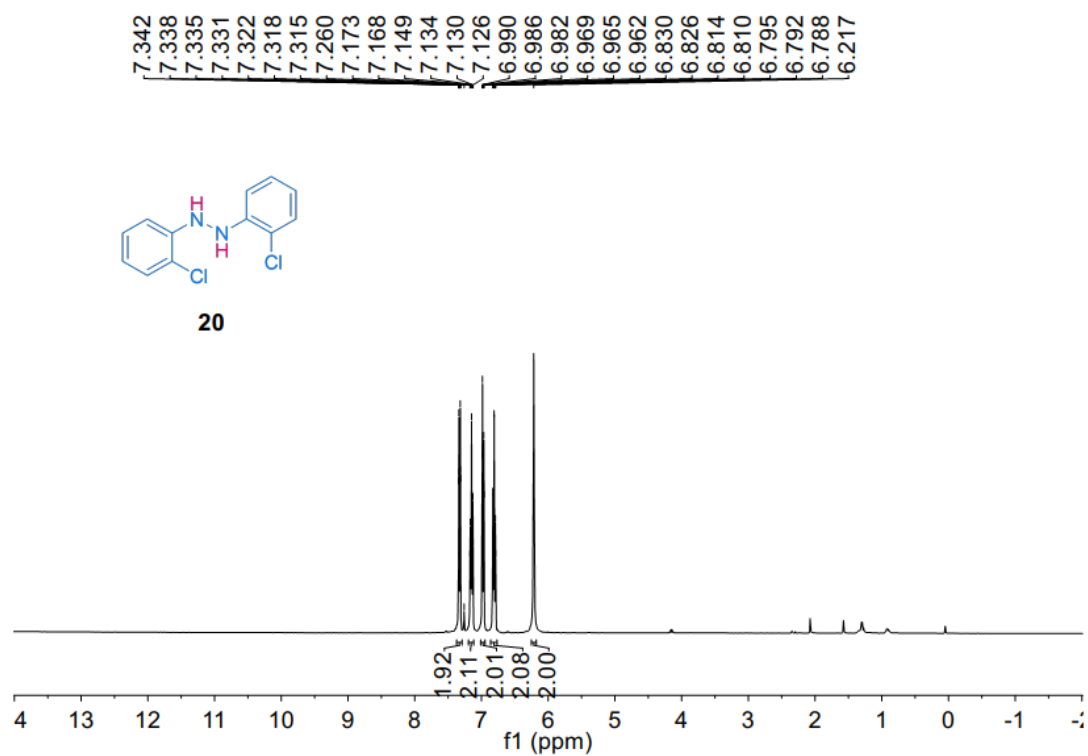

$^{13}\text{C}$  NMR spectrum of **20** (150 MHz,  $\text{CDCl}_3$ ):

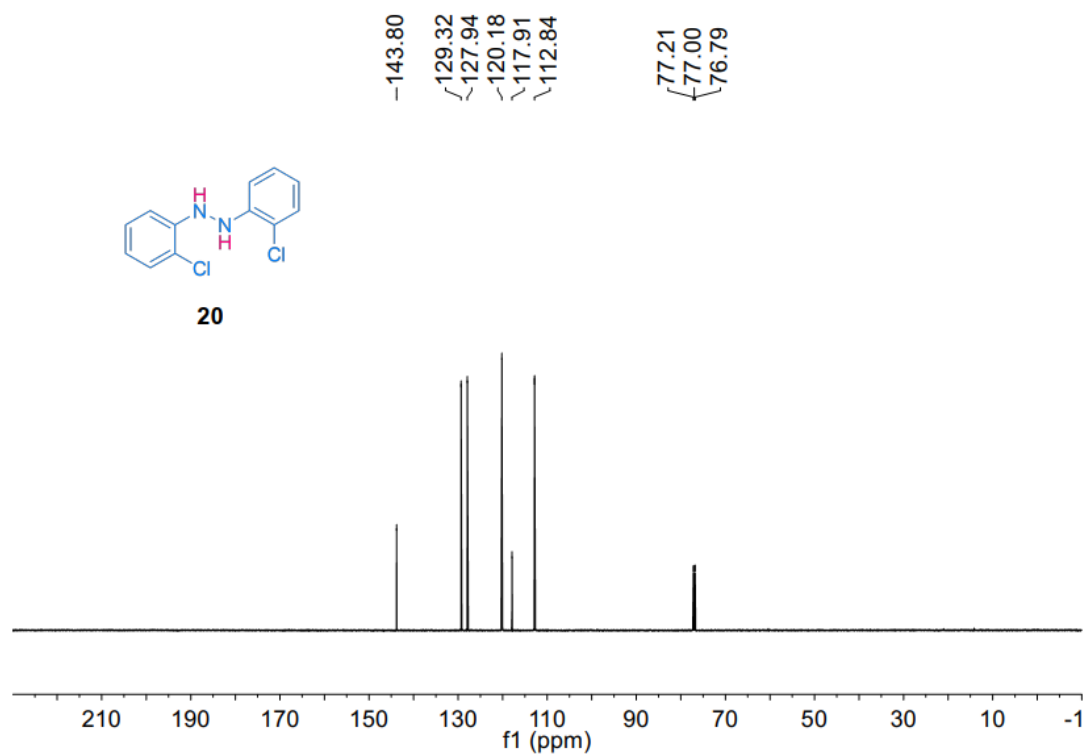

$^1\text{H}$  NMR spectrum of **21** (400 MHz,  $\text{CDCl}_3$ ):

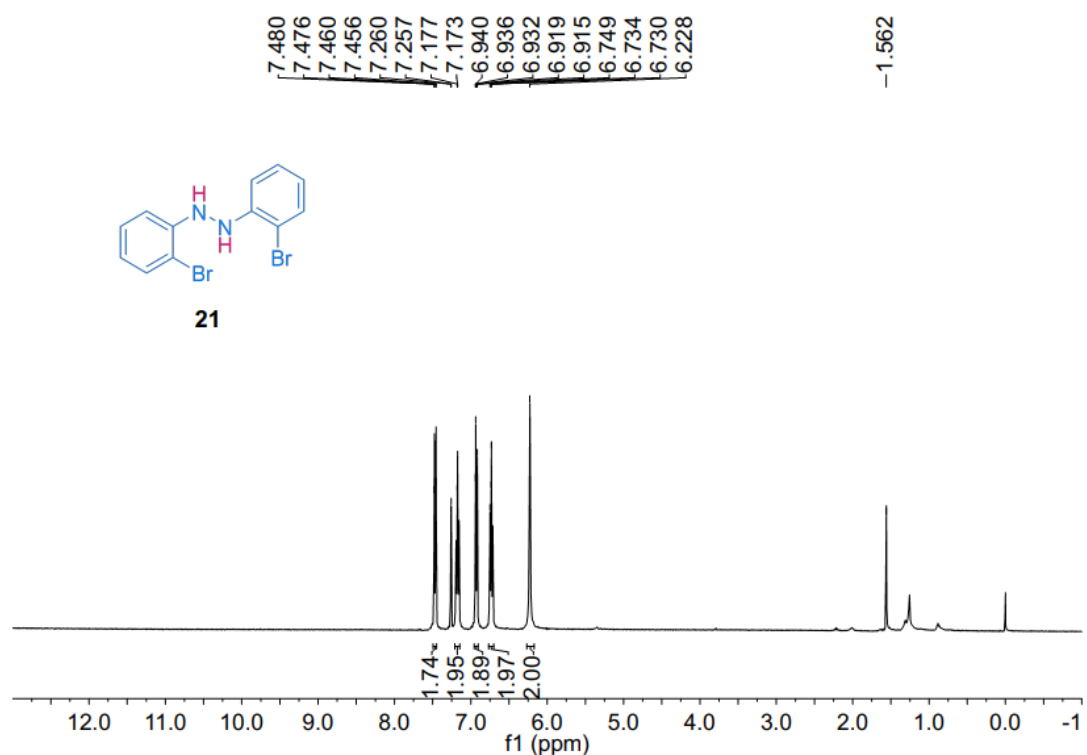

$^{13}\text{C}$  NMR spectrum of **21** (150 MHz,  $\text{CDCl}_3$ ):

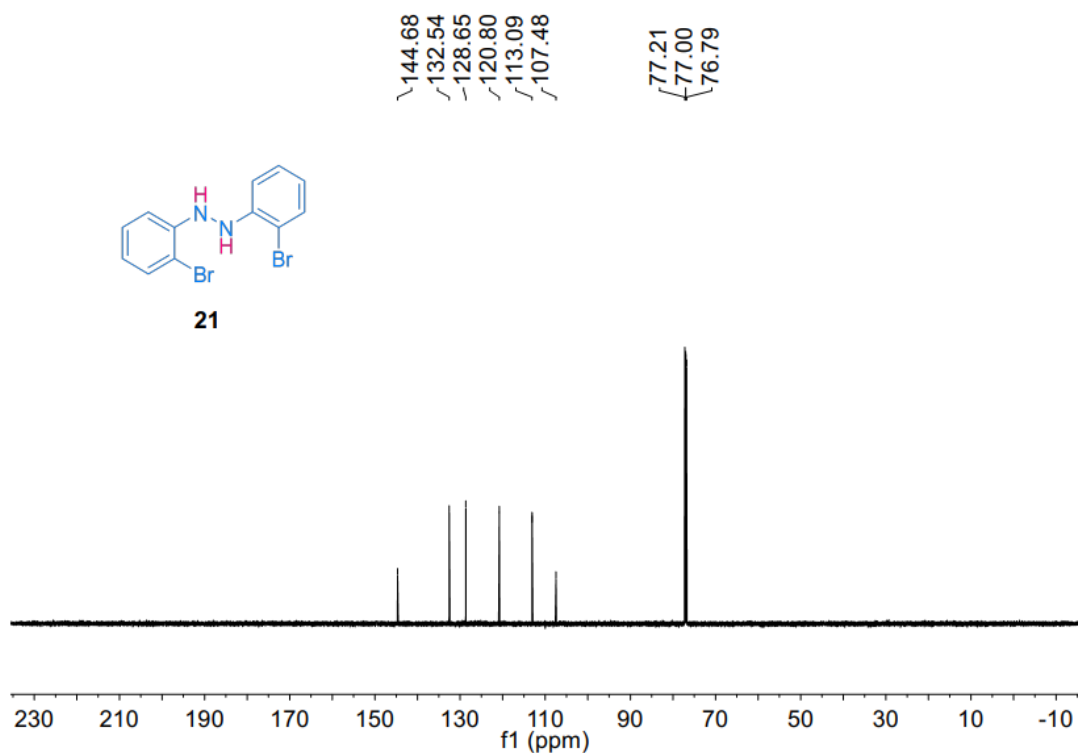

$^1\text{H}$  NMR spectrum of **22** (400 MHz,  $\text{CDCl}_3$ ):

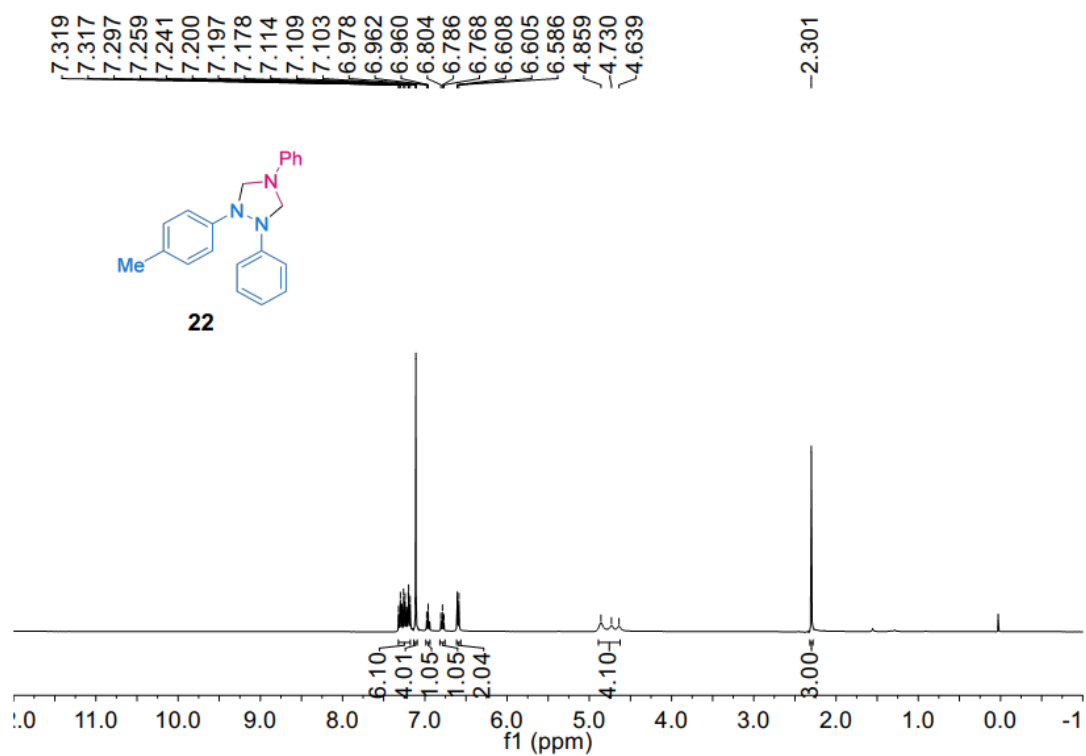

$^{13}\text{C}$  NMR spectrum of **22** (150 MHz,  $\text{CDCl}_3$ ):

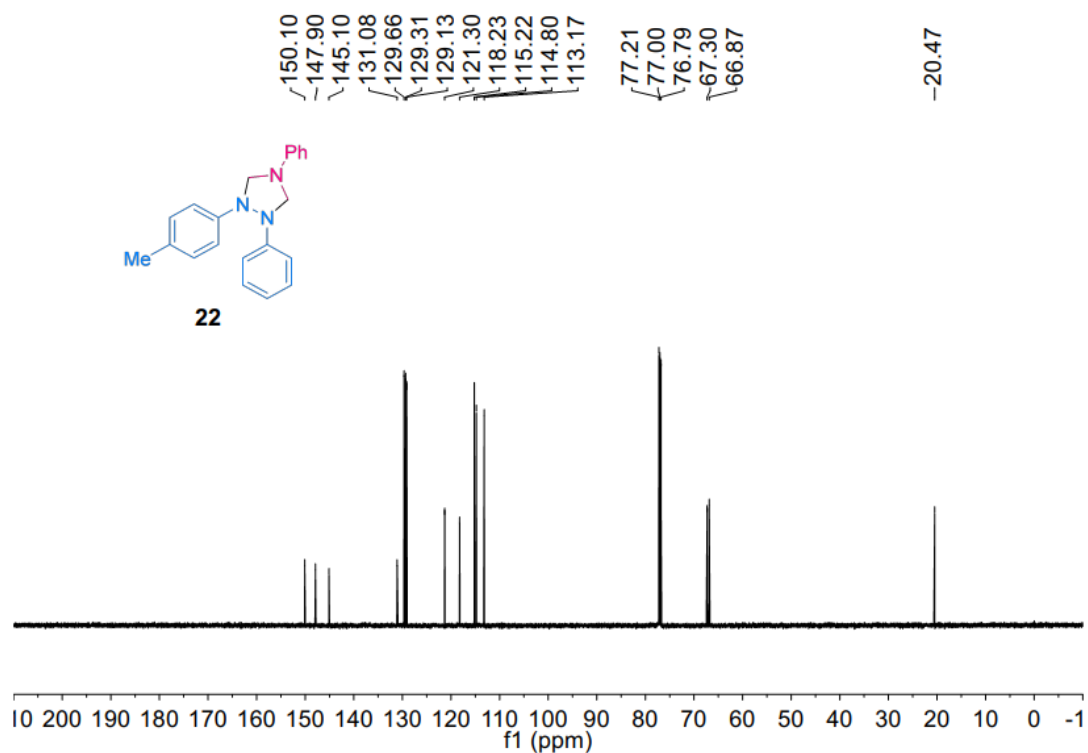

$^1\text{H}$  NMR spectrum of **23** (400 MHz,  $\text{CDCl}_3$ ):

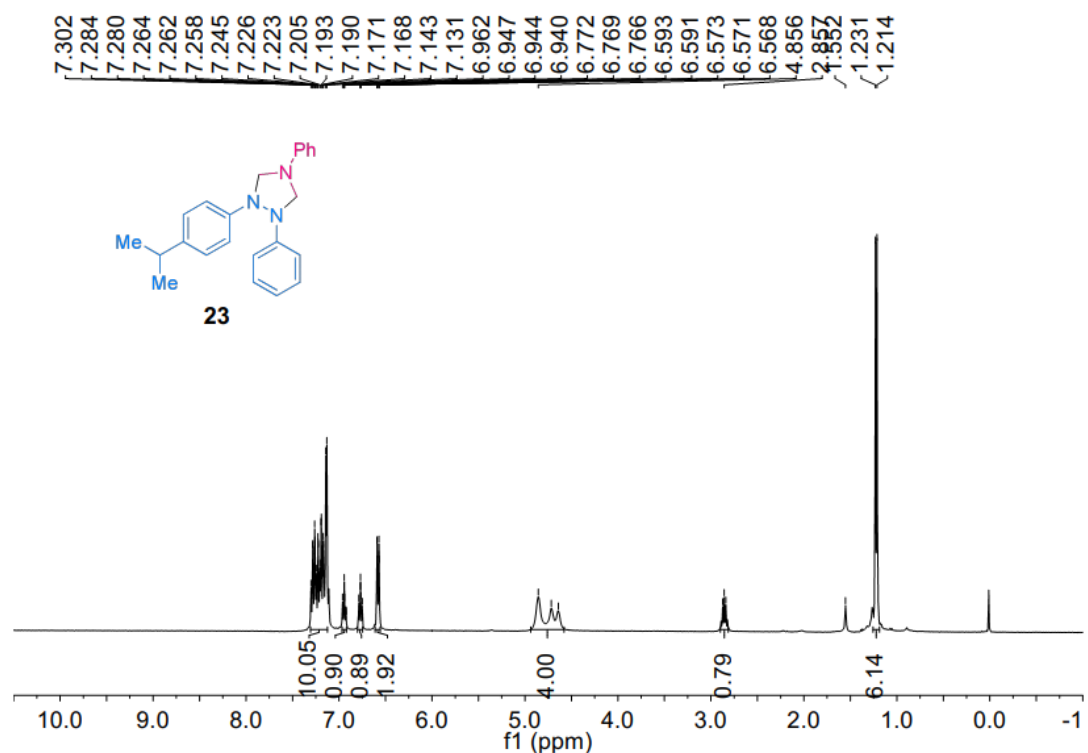

$^{13}\text{C}$  NMR spectrum of **23** (150 MHz,  $\text{CDCl}_3$ ):

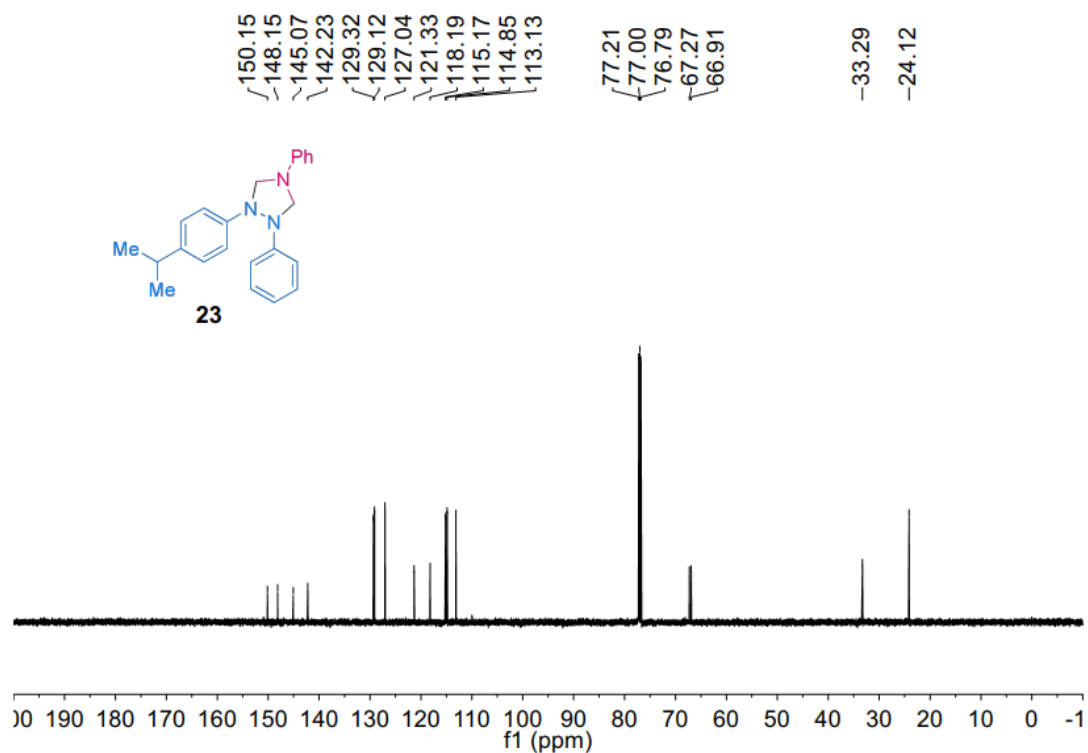

$^1\text{H}$  NMR spectrum of **24** (400 MHz,  $\text{CDCl}_3$ ):

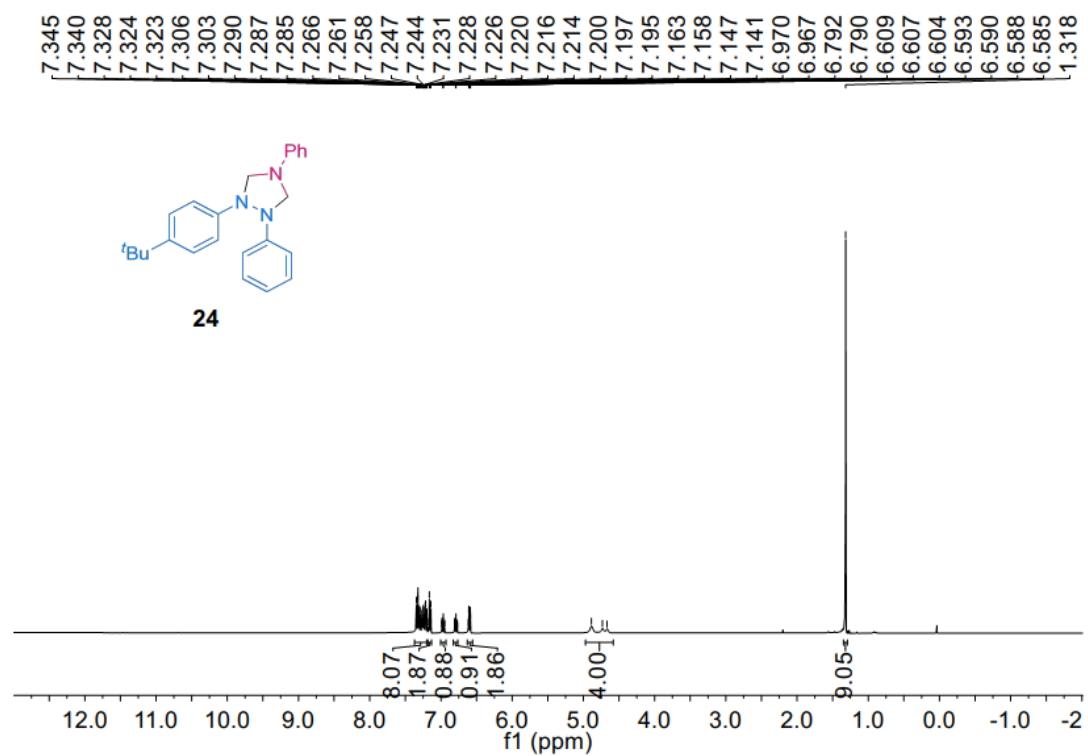

$^{13}\text{C}$  NMR spectrum of **24** (150 MHz,  $\text{CDCl}_3$ ):

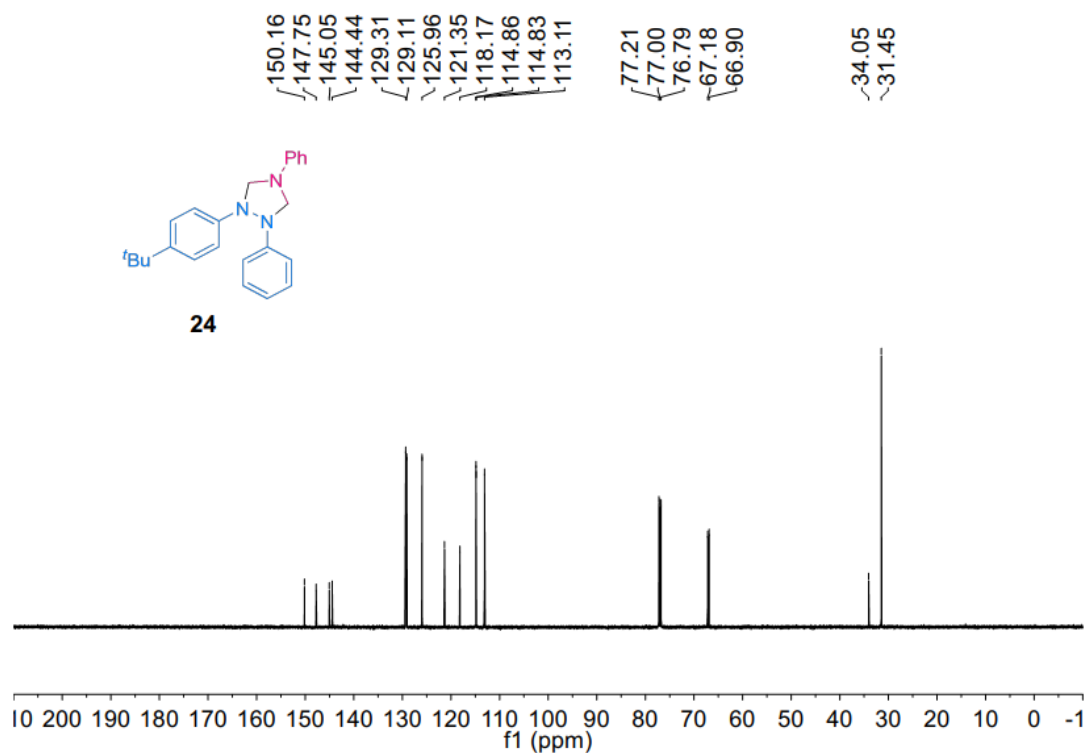

$^1\text{H}$  NMR spectrum of **25** (400 MHz,  $\text{CDCl}_3$ ):

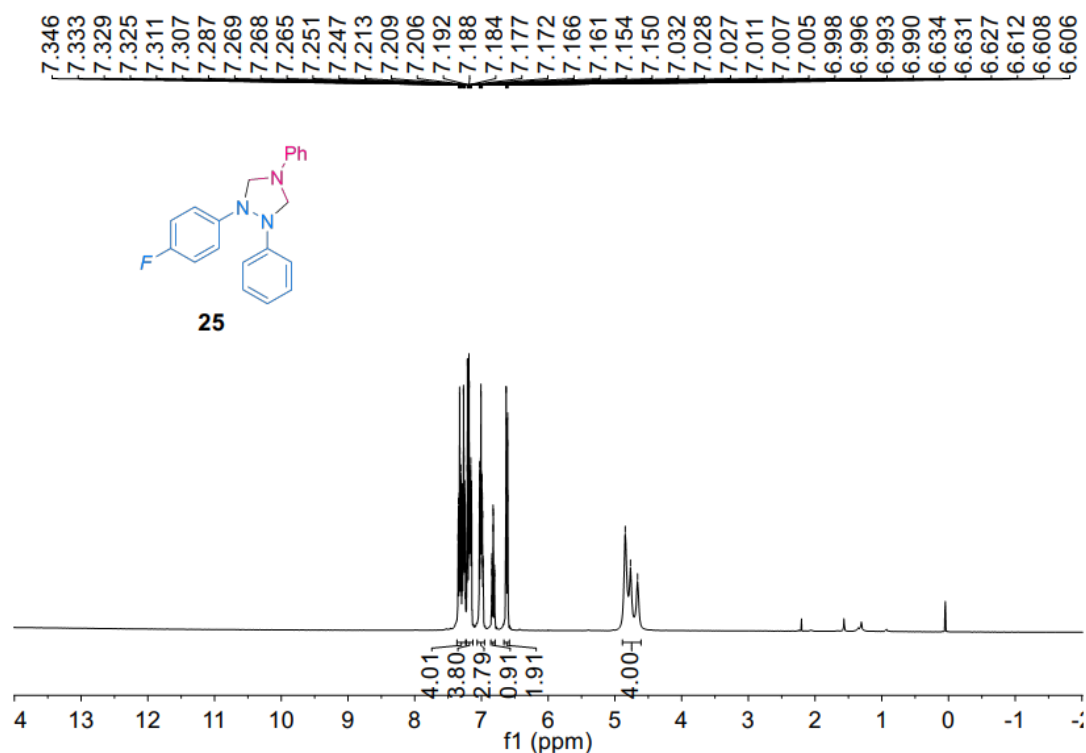

$^{13}\text{C}$  NMR spectrum of **25** (150 MHz,  $\text{CDCl}_3$ ):

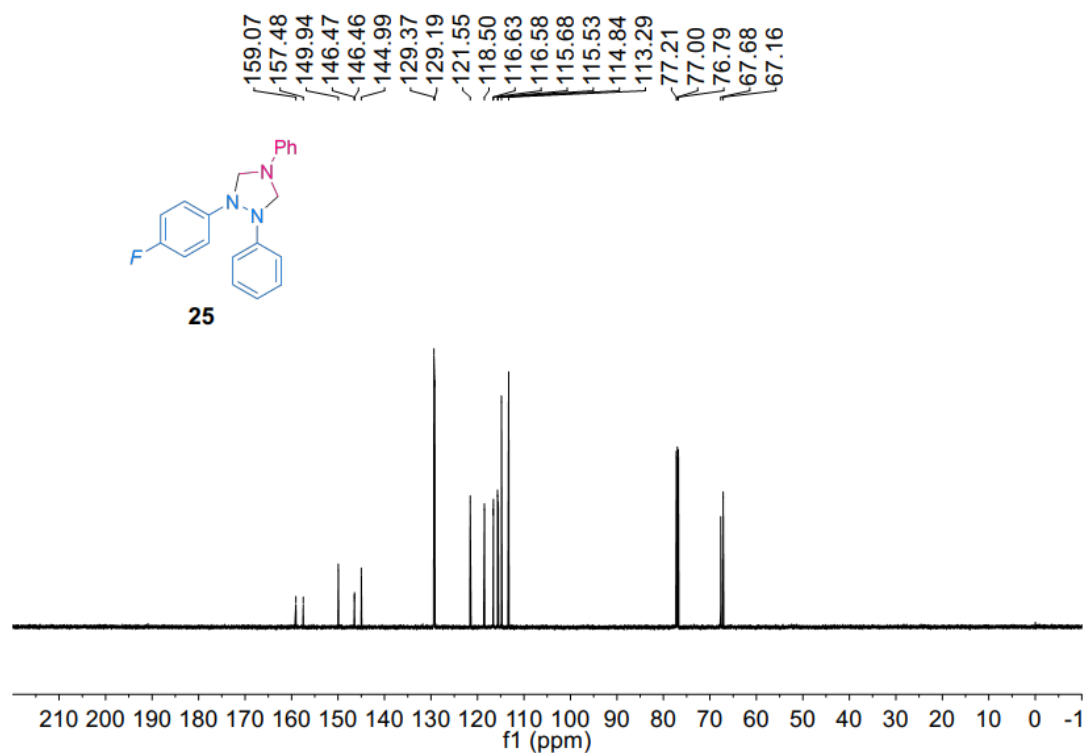

$^{19}\text{F}$  NMR spectrum of **25** (376 MHz,  $\text{CDCl}_3$ ):

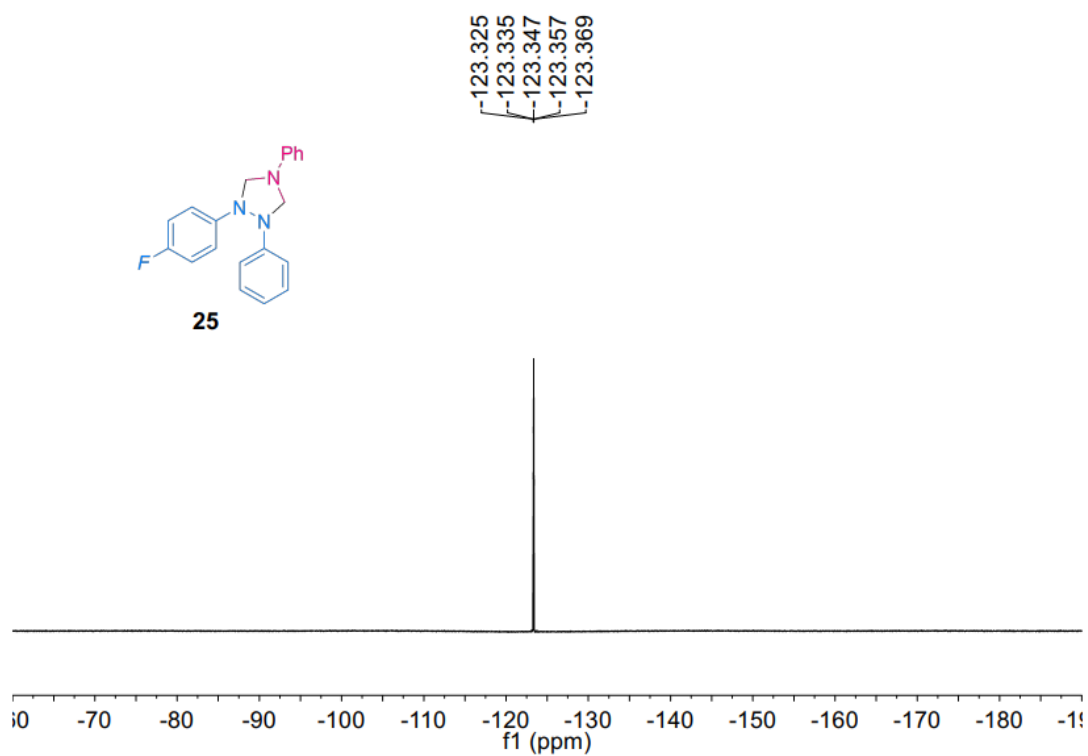



$^1\text{H}$  NMR spectrum of **26** (400 MHz,  $\text{CDCl}_3$ ):

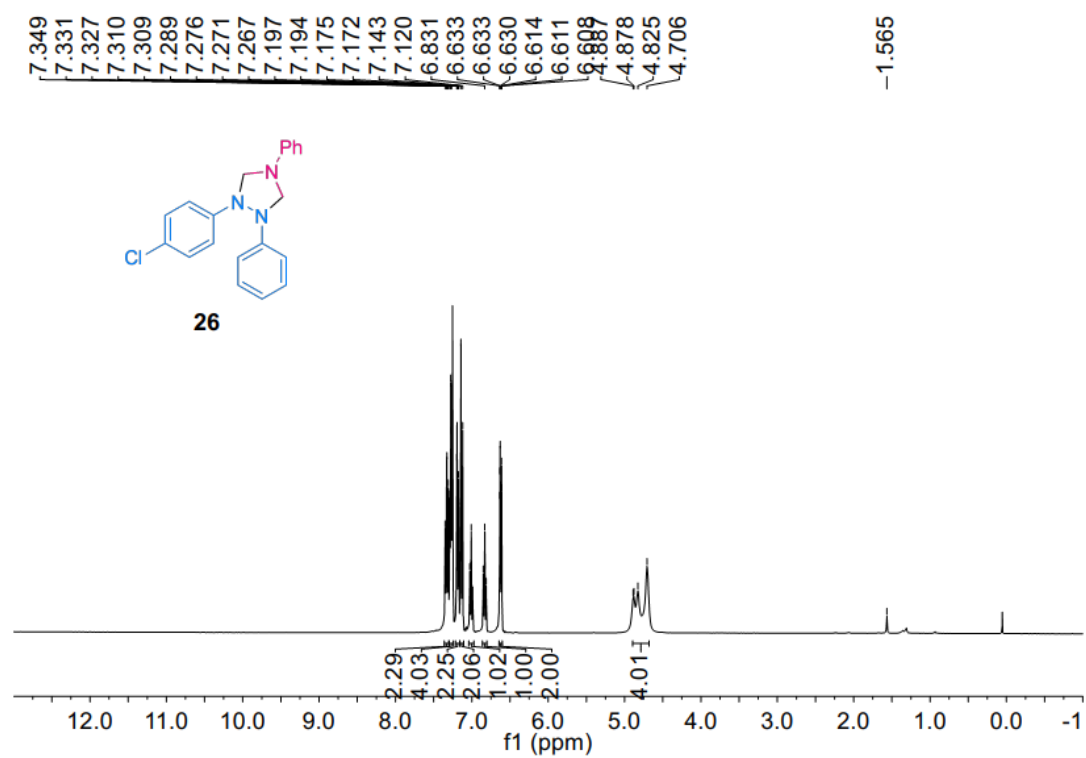

$^{13}\text{C}$  NMR spectrum of **26** (150 MHz,  $\text{CDCl}_3$ ):

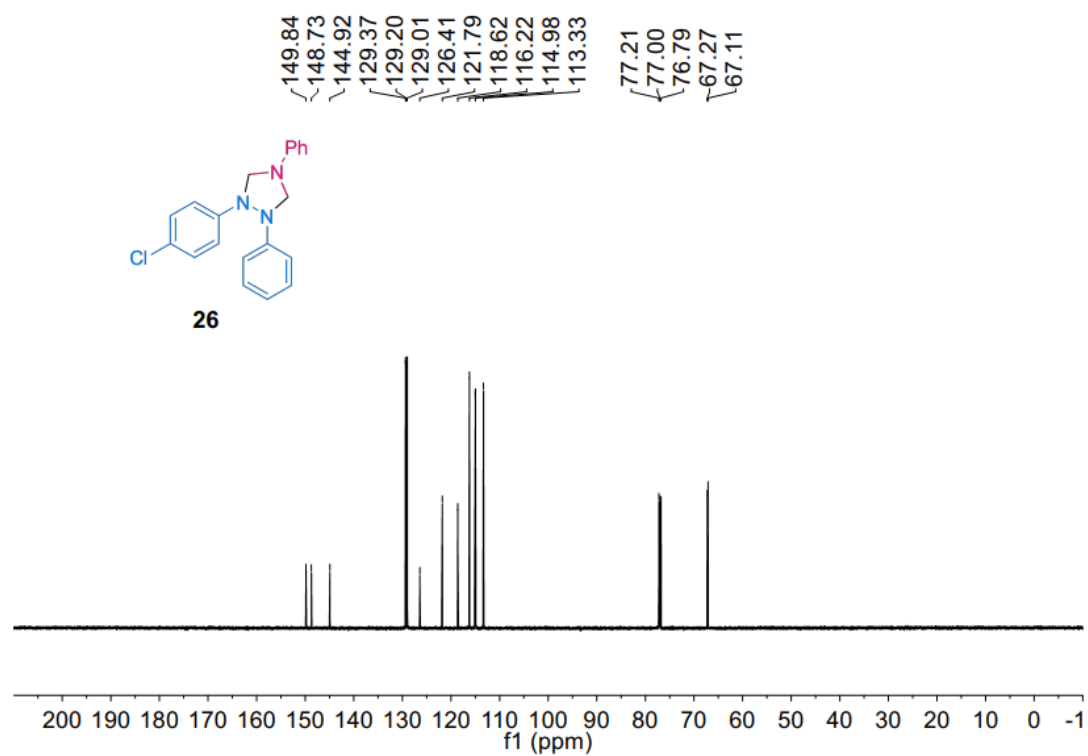

$^1\text{H}$  NMR spectrum of **27** (400 MHz,  $\text{CDCl}_3$ ):

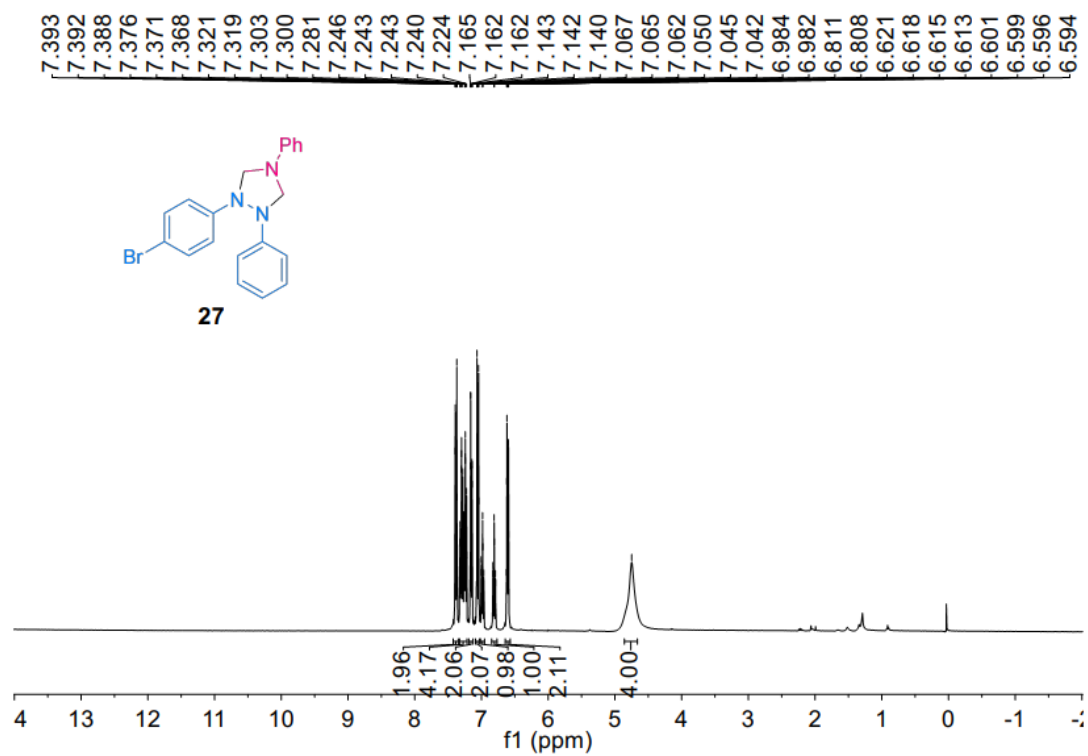

$^{13}\text{C}$  NMR spectrum of **27** (150 MHz,  $\text{CDCl}_3$ ):

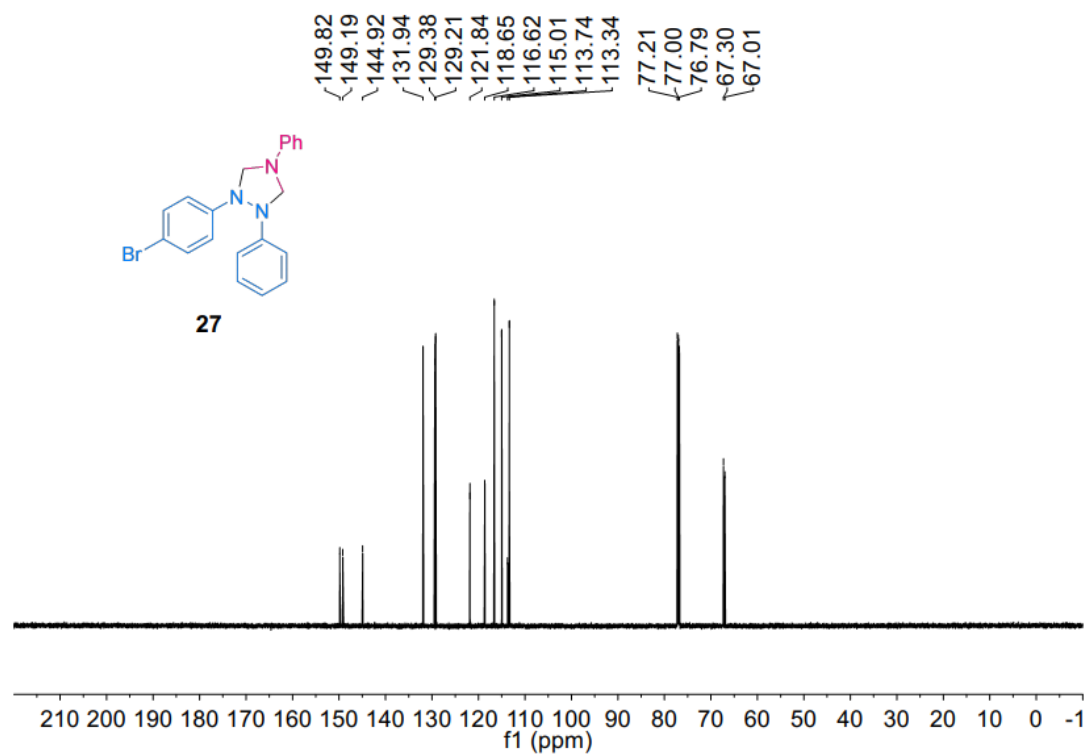

$^1\text{H}$  NMR spectrum of **28** (400 MHz,  $\text{CDCl}_3$ ):

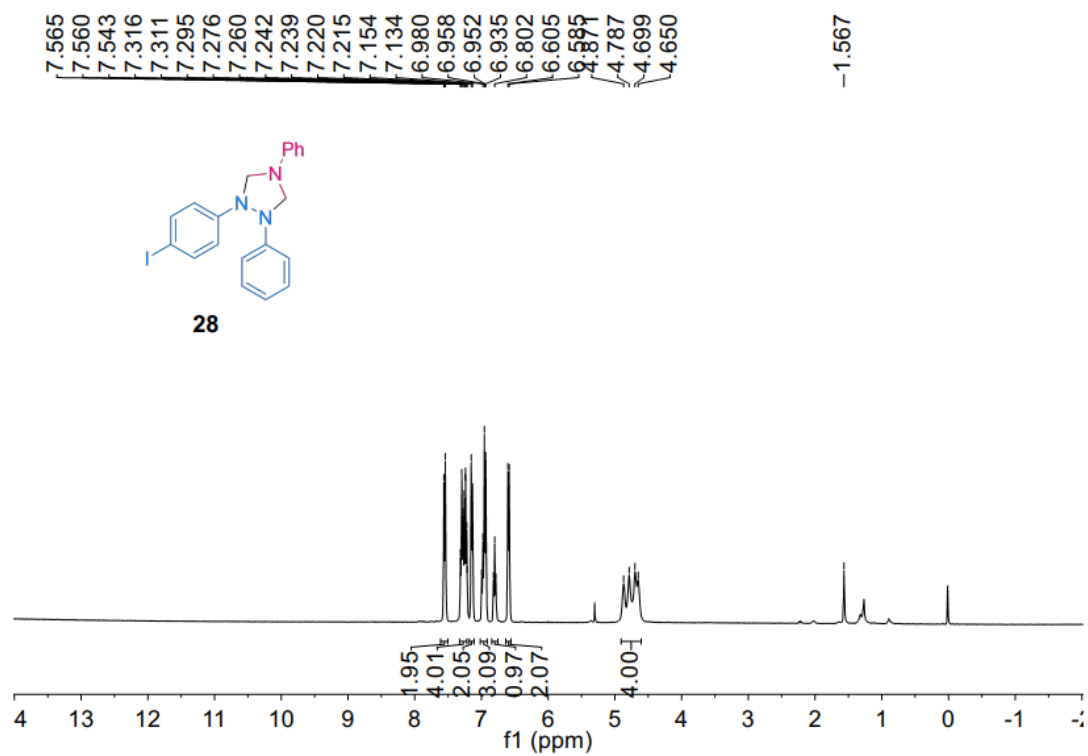

$^{13}\text{C}$  NMR spectrum of **28** (150 MHz,  $\text{CDCl}_3$ ):

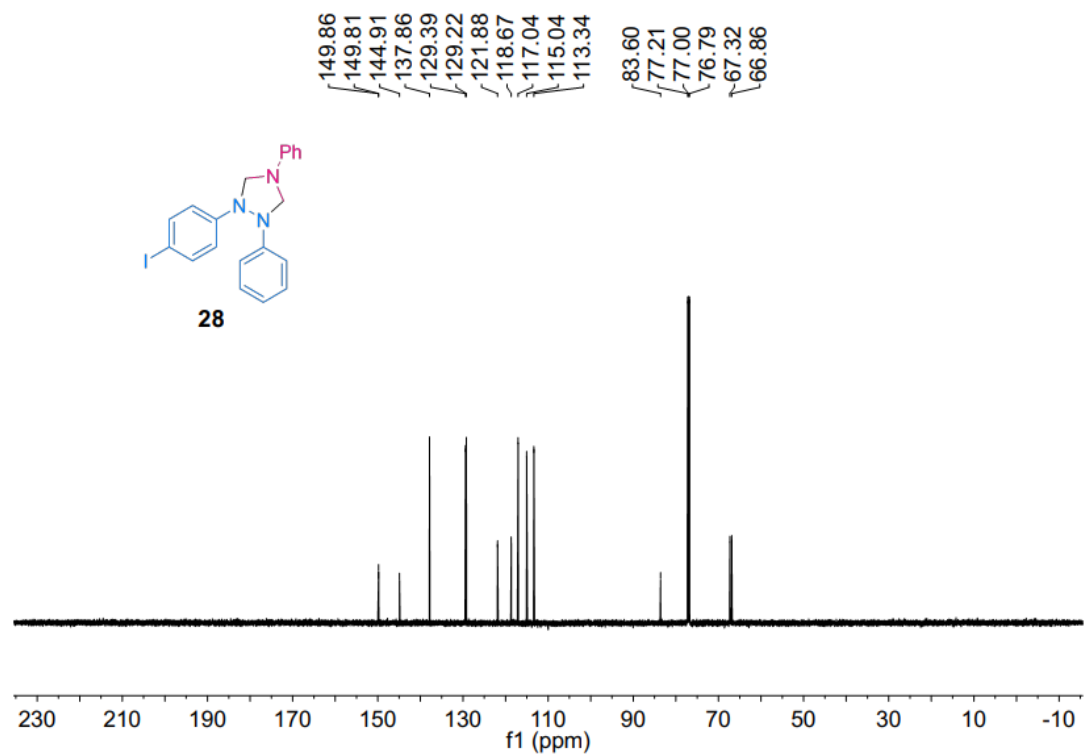

$^1\text{H}$  NMR spectrum of **29** (400 MHz,  $\text{CDCl}_3$ ):

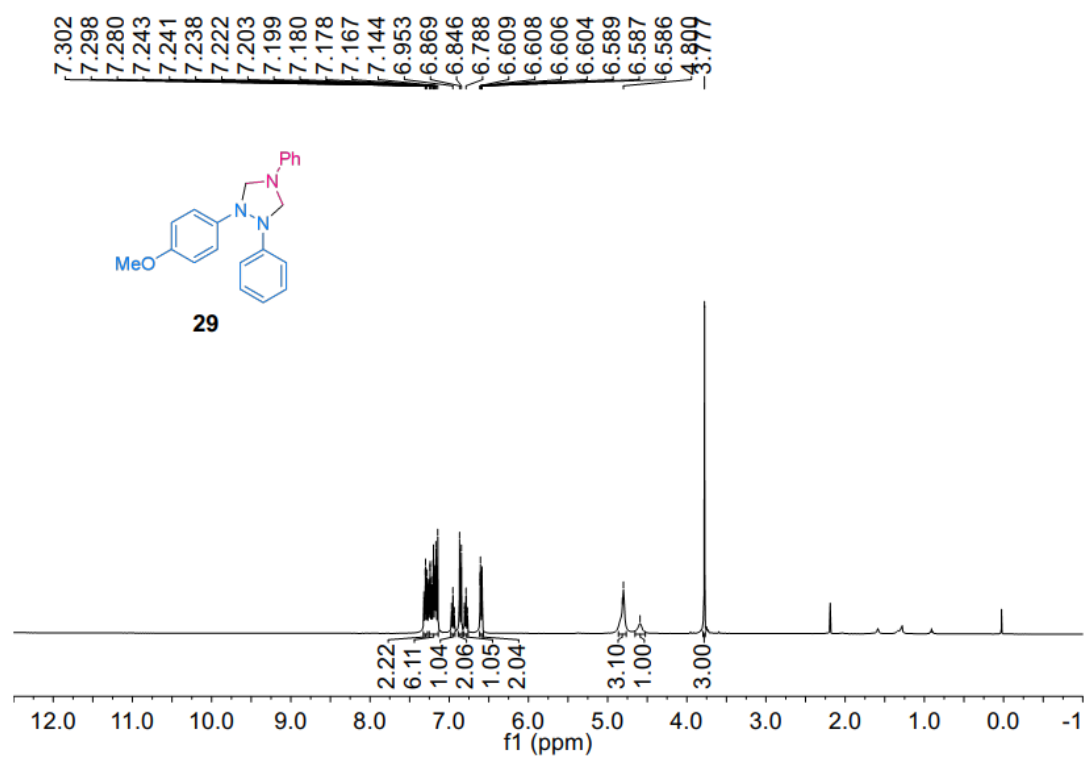

$^{13}\text{C}$  NMR spectrum of **29** (150 MHz,  $\text{CDCl}_3$ ):

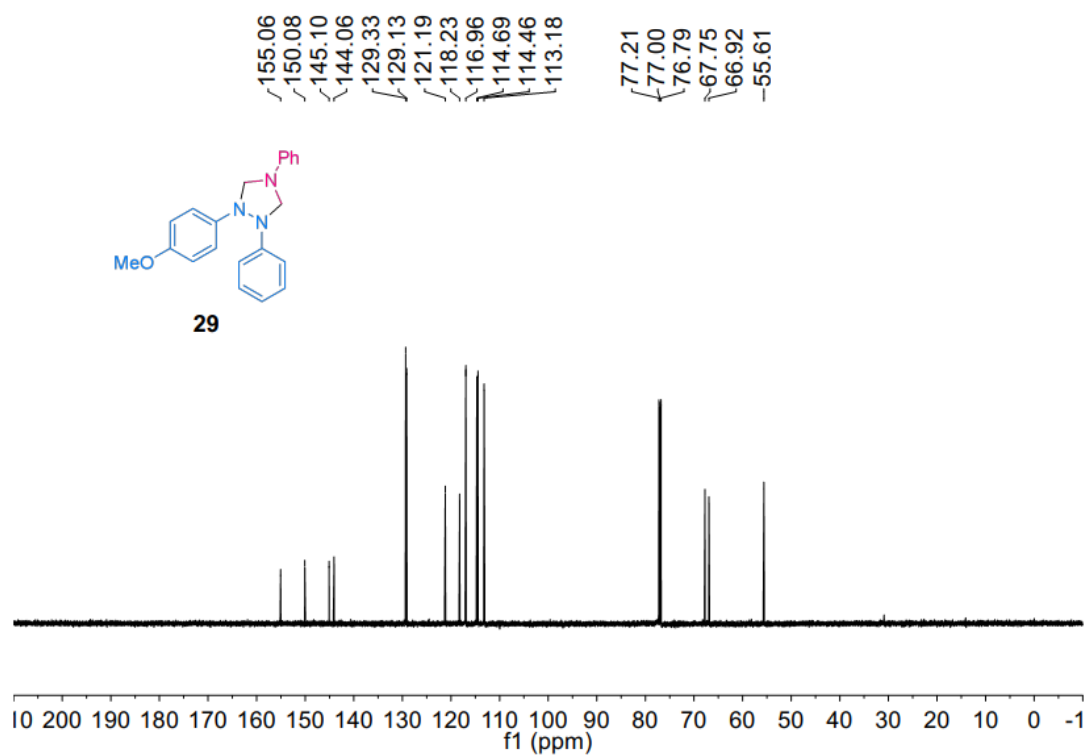

$^1\text{H}$  NMR spectrum of **30** (400 MHz,  $\text{CDCl}_3$ ):

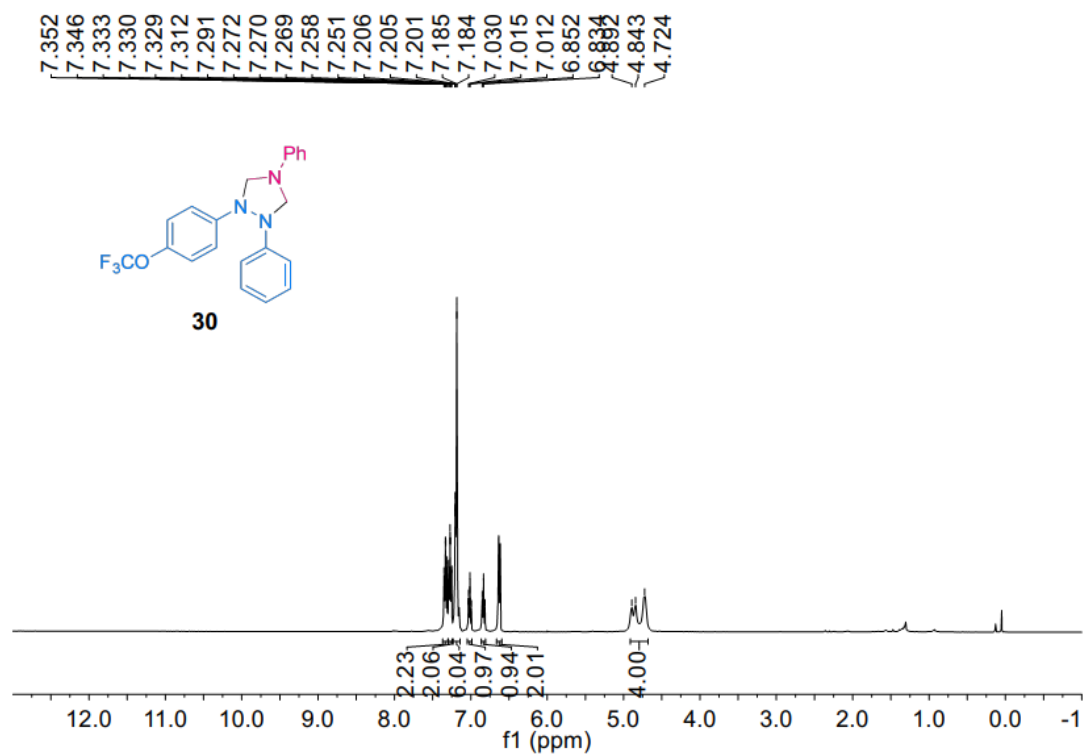

$^{13}\text{C}$  NMR spectrum of **30** (150 MHz,  $\text{CDCl}_3$ ):

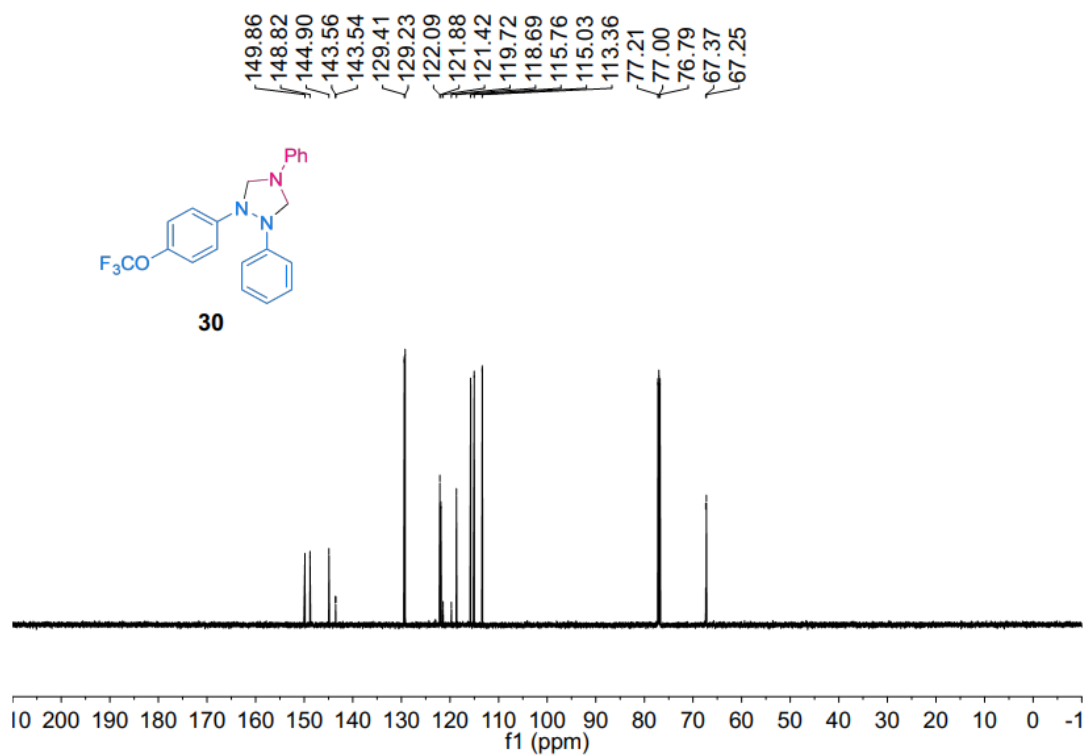

$^{19}\text{F}$  NMR spectrum of **30** (376 MHz,  $\text{CDCl}_3$ ):

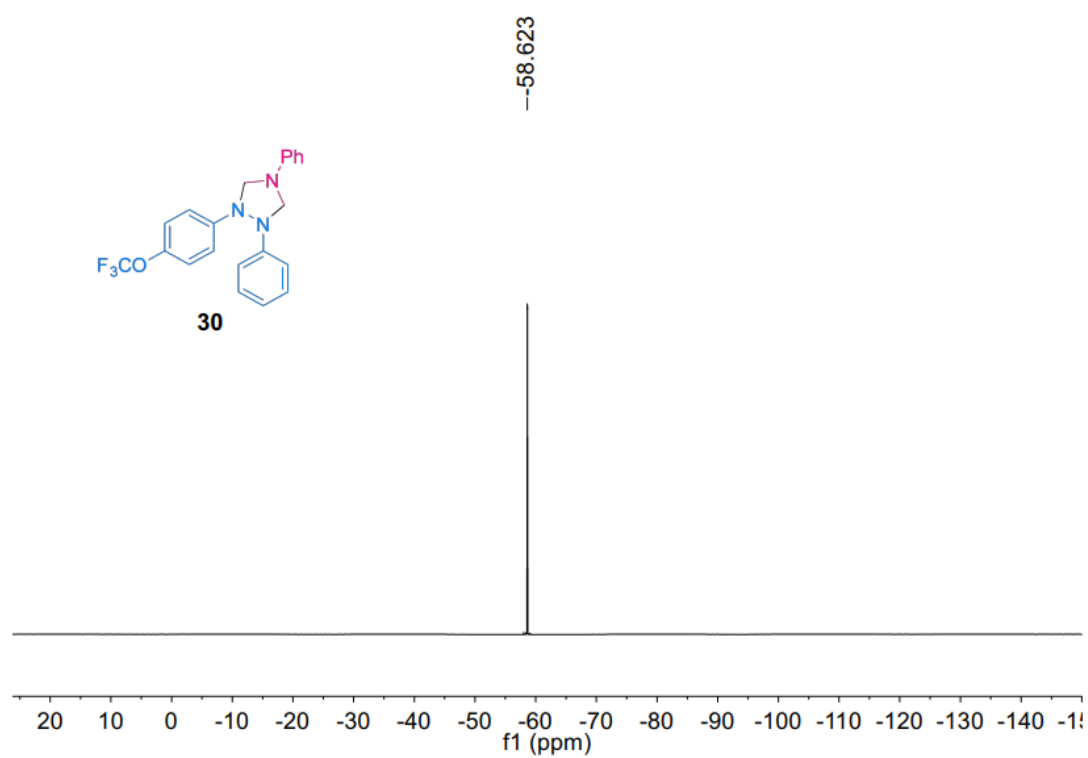

$^1\text{H}$  NMR spectrum of **31** (400 MHz,  $\text{CDCl}_3$ ):

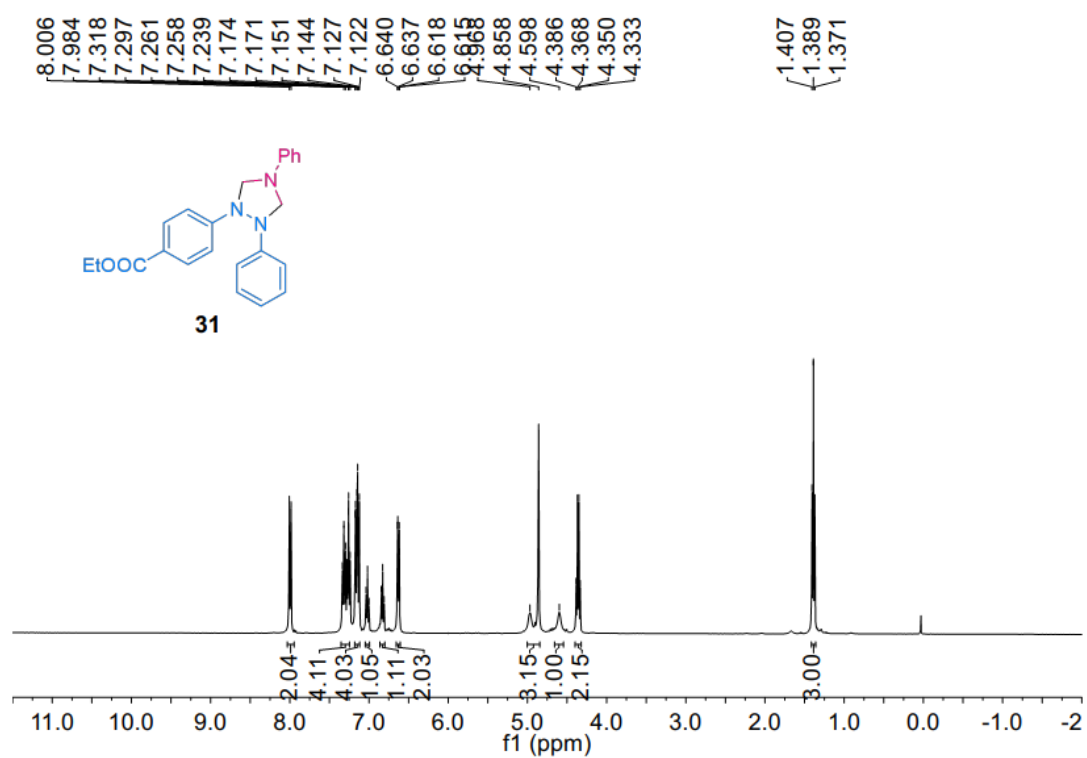

$^{13}\text{C}$  NMR spectrum of **31** (150 MHz,  $\text{CDCl}_3$ ):

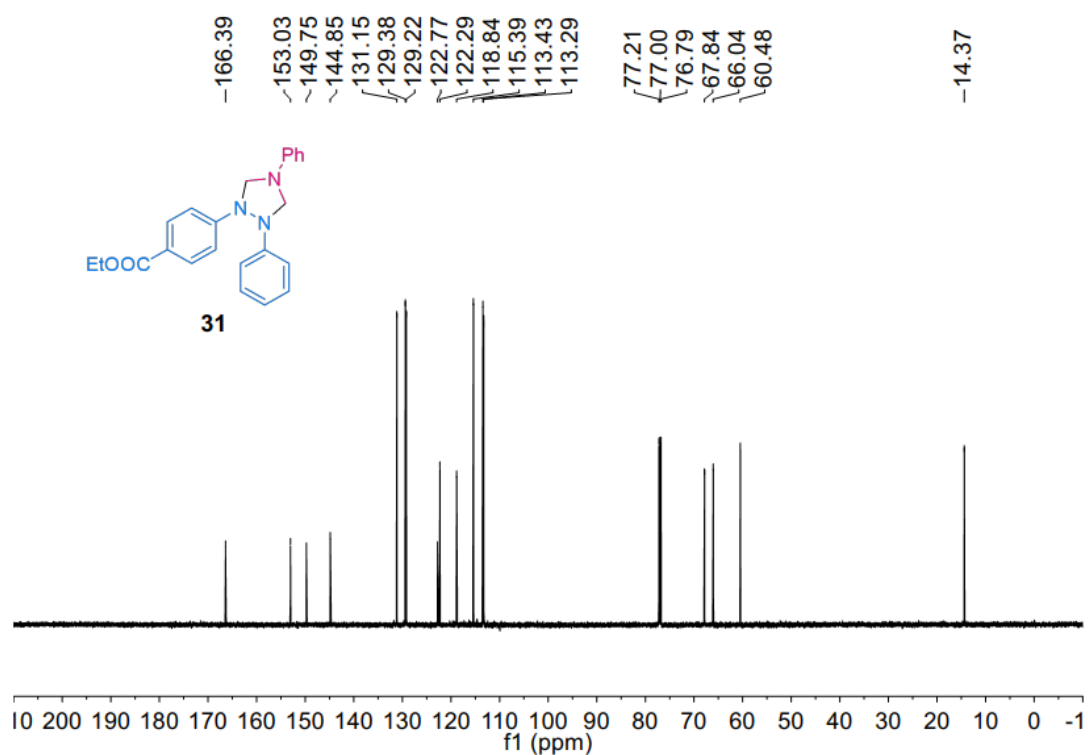

$^1\text{H}$  NMR spectrum of **32** (400 MHz,  $\text{CDCl}_3$ ):

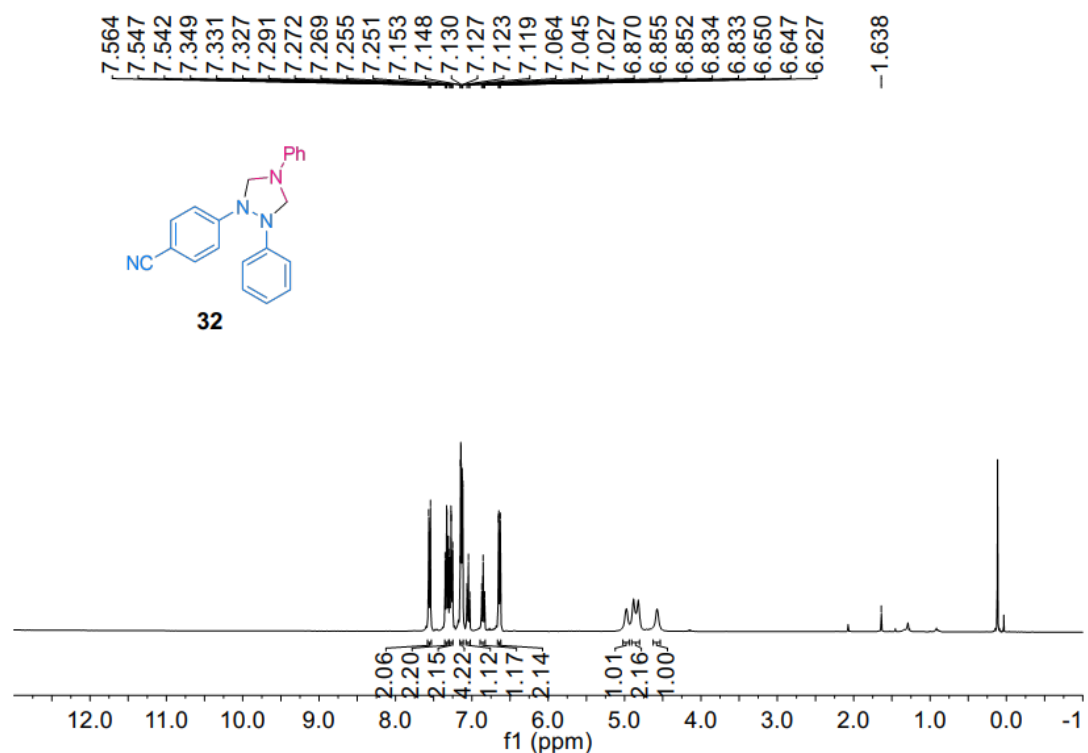

$^{13}\text{C}$  NMR spectrum of **32** (150 MHz,  $\text{CDCl}_3$ ):

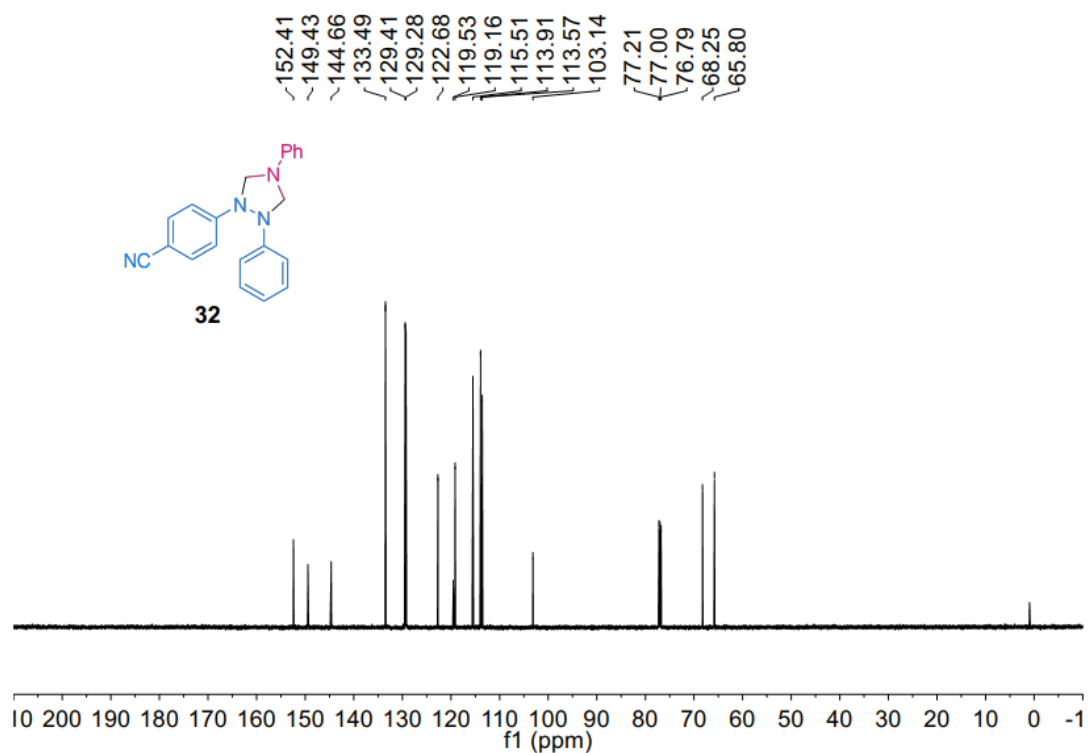

$^1\text{H}$  NMR spectrum of **33** (400 MHz,  $\text{CDCl}_3$ ):

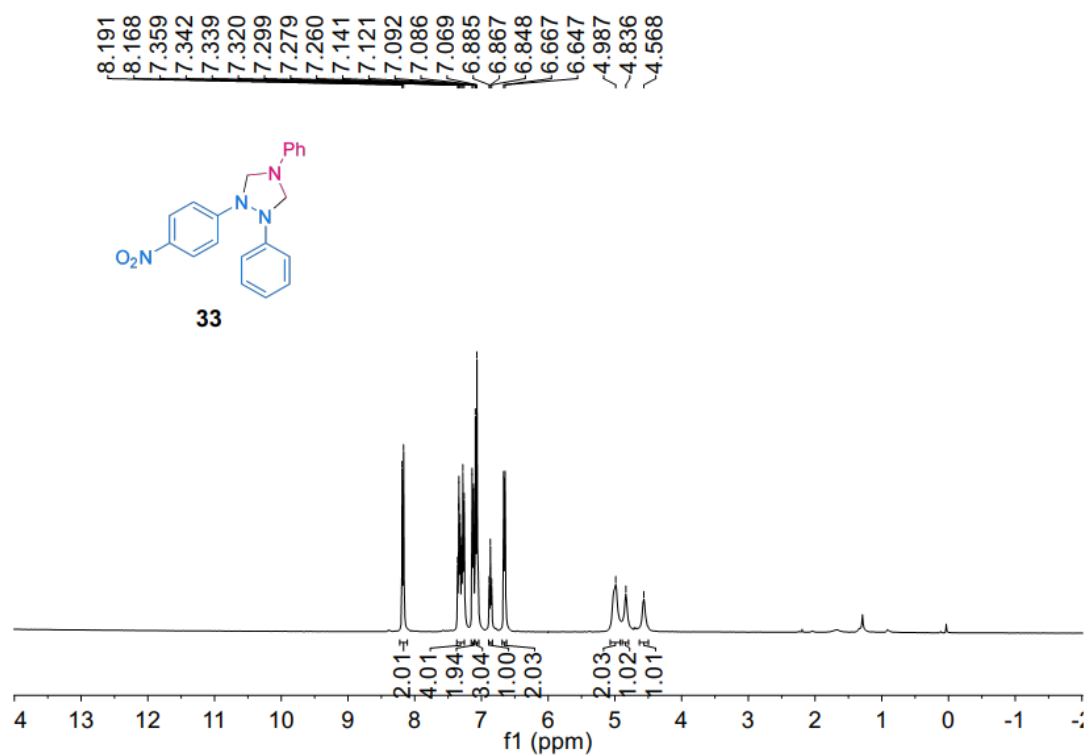



$^{13}\text{C}$  NMR spectrum of **33** (150 MHz,  $\text{CDCl}_3$ ):

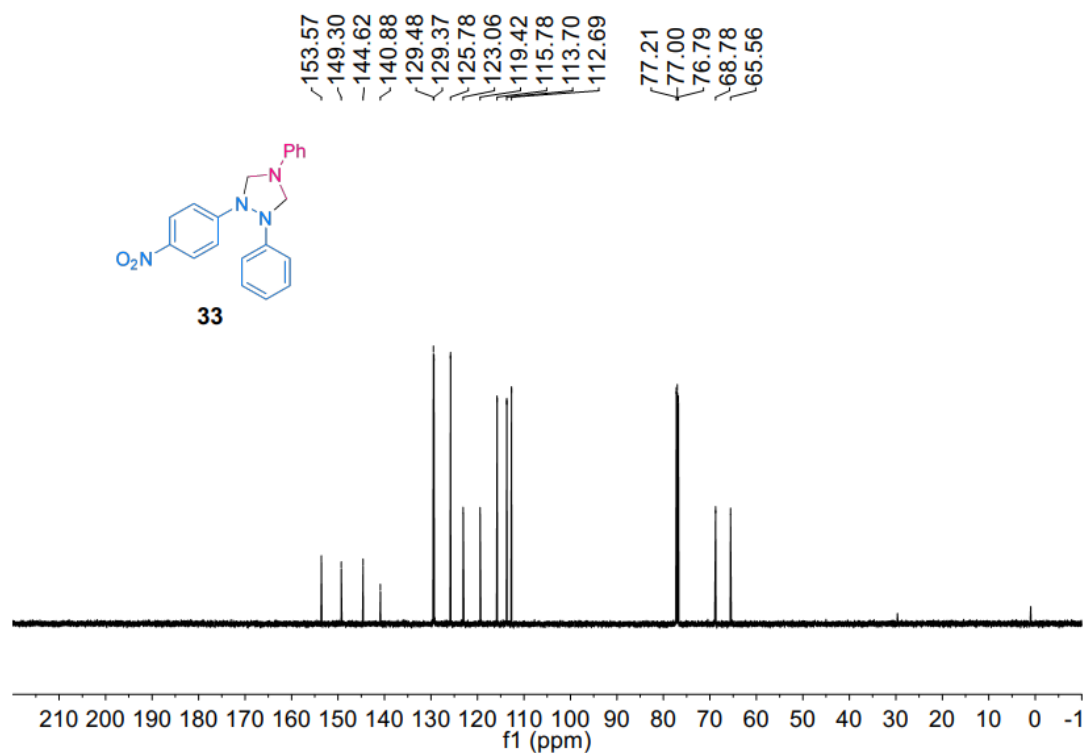

$^1\text{H}$  NMR spectrum of **34** (400 MHz,  $\text{CDCl}_3$ ):

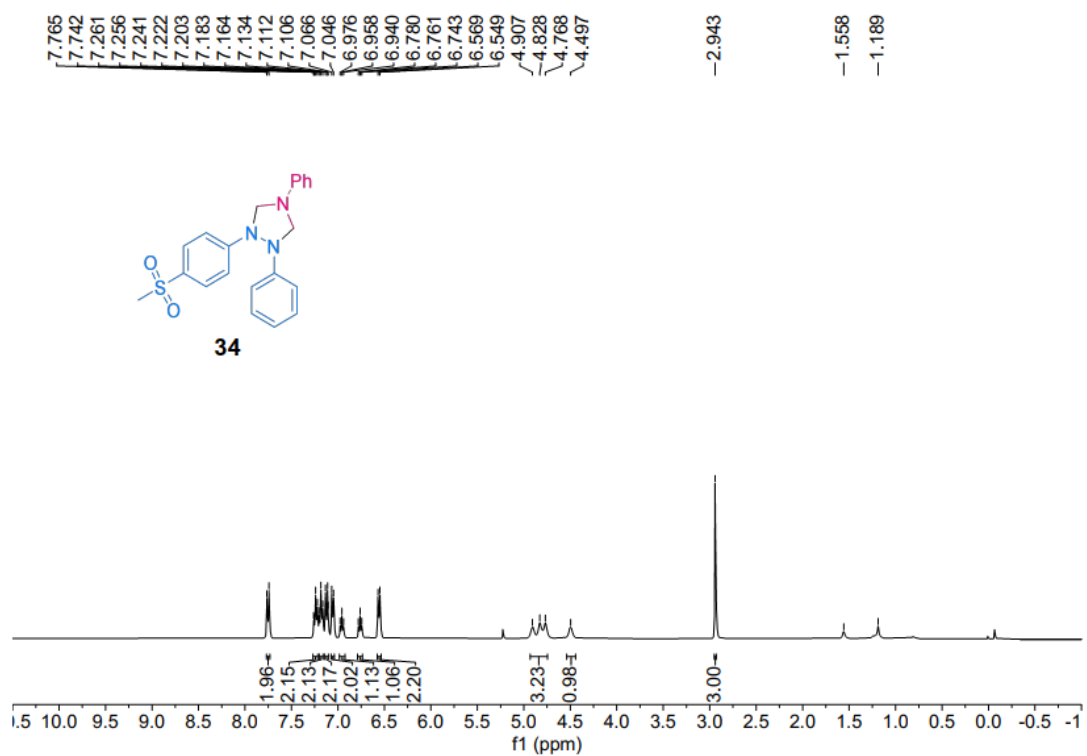

$^{13}\text{C}$  NMR spectrum of **34** (150 MHz,  $\text{CDCl}_3$ ):

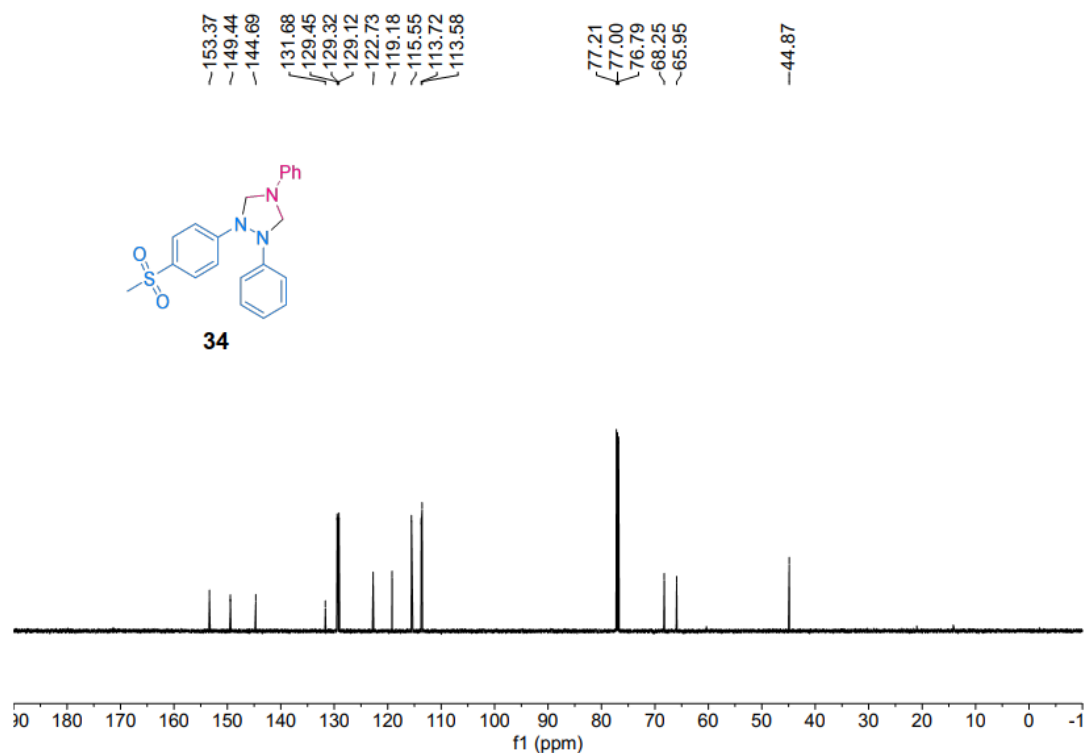

$^1\text{H}$  NMR spectrum of **35** (400 MHz,  $\text{CDCl}_3$ ):

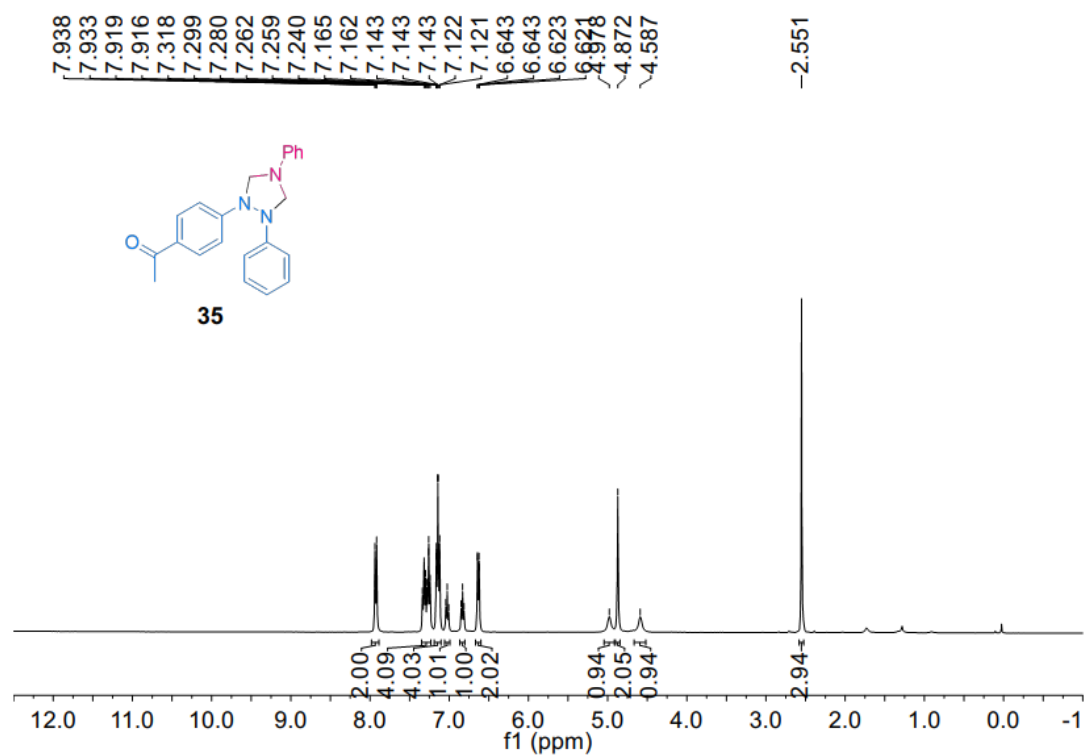

$^{13}\text{C}$  NMR spectrum of **35** (150 MHz,  $\text{CDCl}_3$ ):

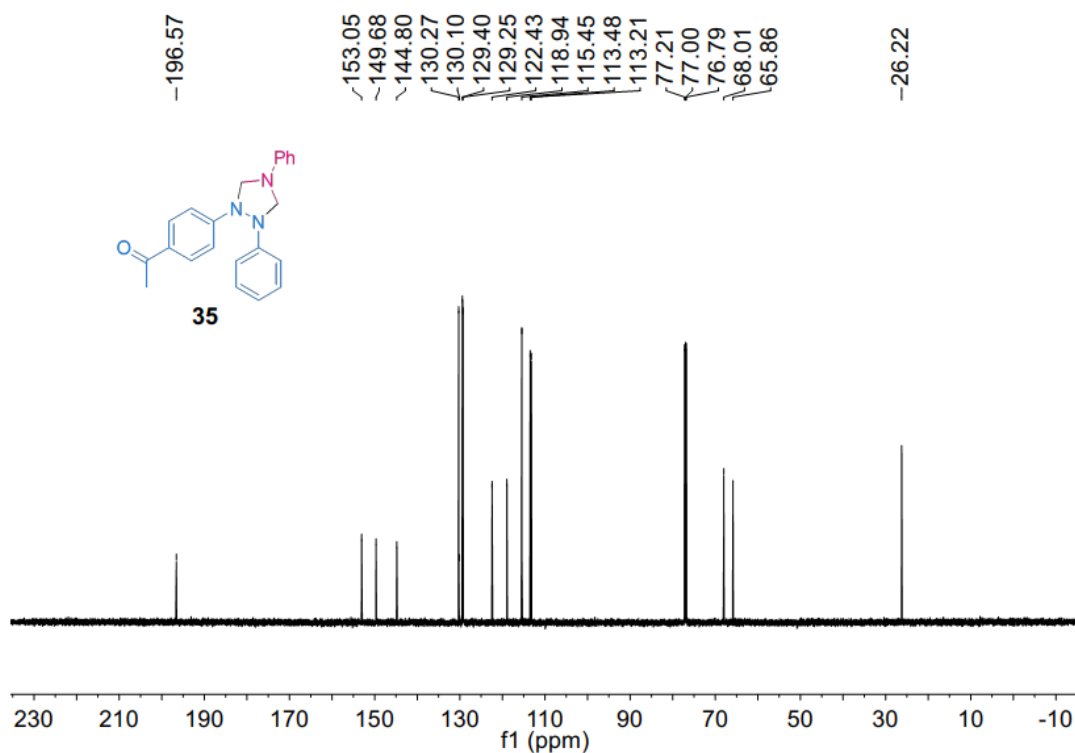

$^1\text{H}$  NMR spectrum of **36** (400 MHz,  $\text{CDCl}_3$ ):

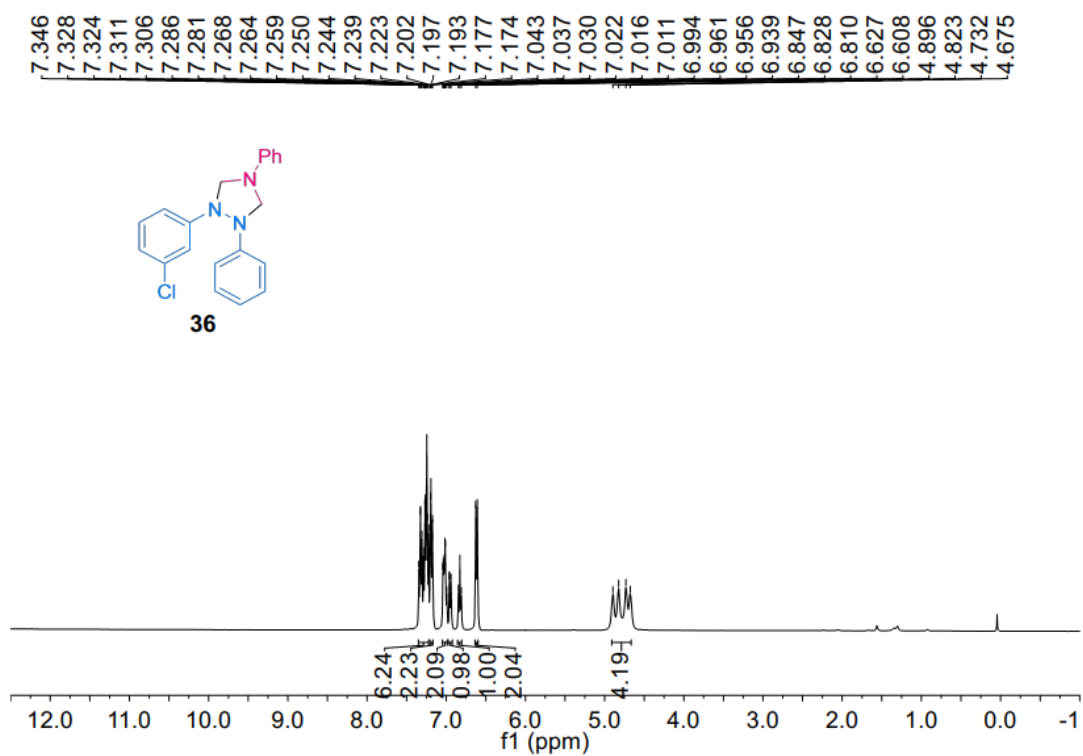

$^{13}\text{C}$  NMR spectrum of **36** (150 MHz,  $\text{CDCl}_3$ ):

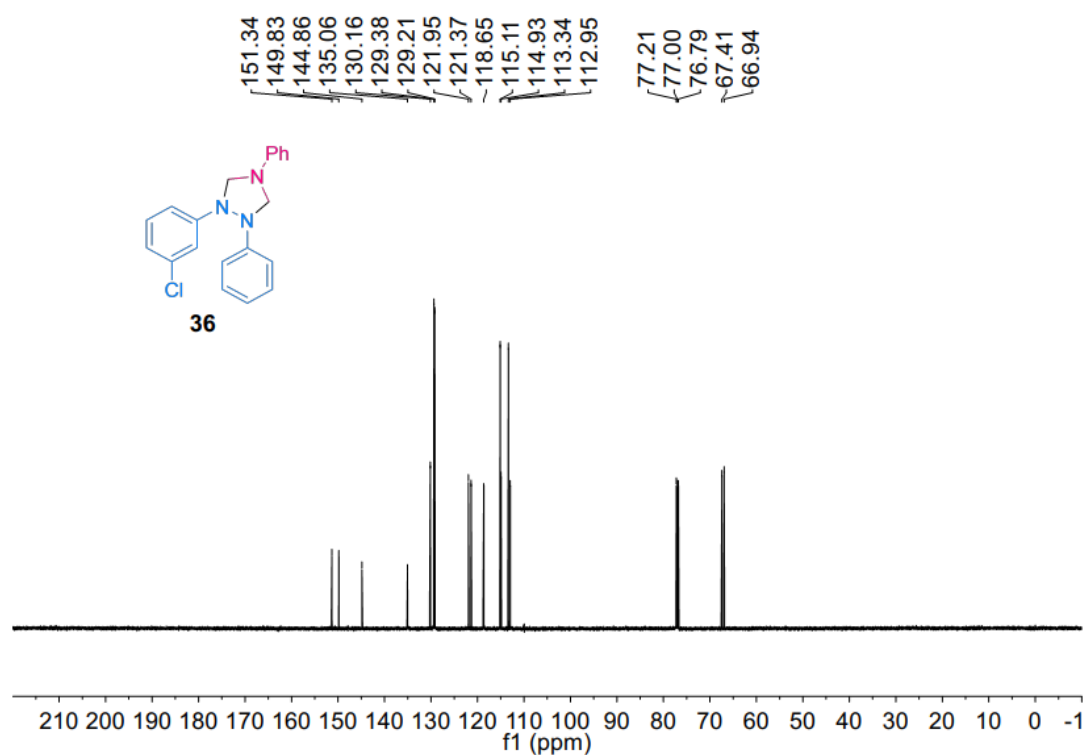

$^1\text{H}$  NMR spectrum of **37** (400 MHz,  $\text{CDCl}_3$ ):

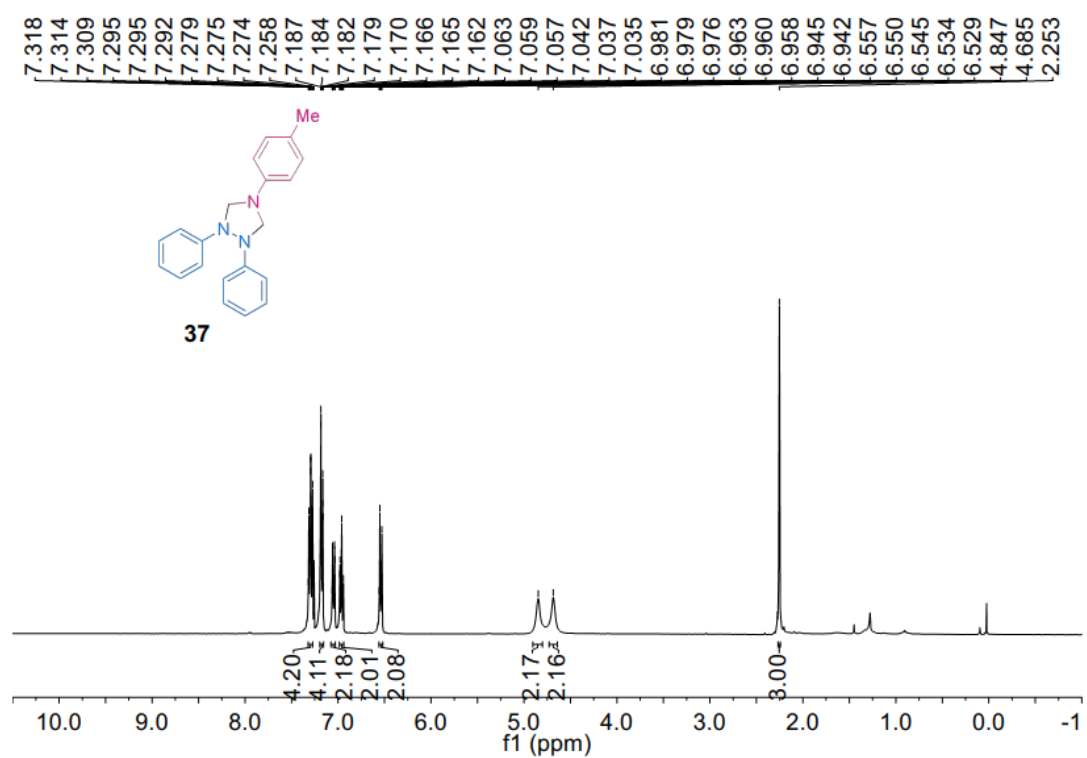

$^{13}\text{C}$  NMR spectrum of **37** (150 MHz,  $\text{CDCl}_3$ ):

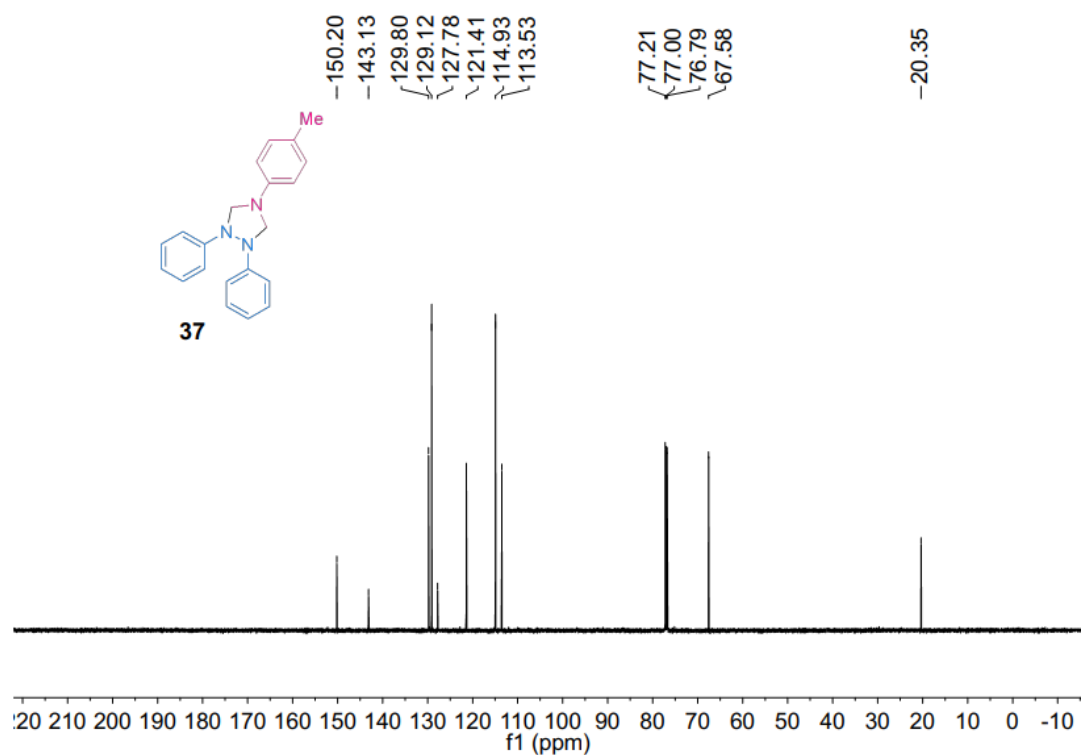

$^1\text{H}$  NMR spectrum of **38** (400 MHz,  $\text{CDCl}_3$ ):

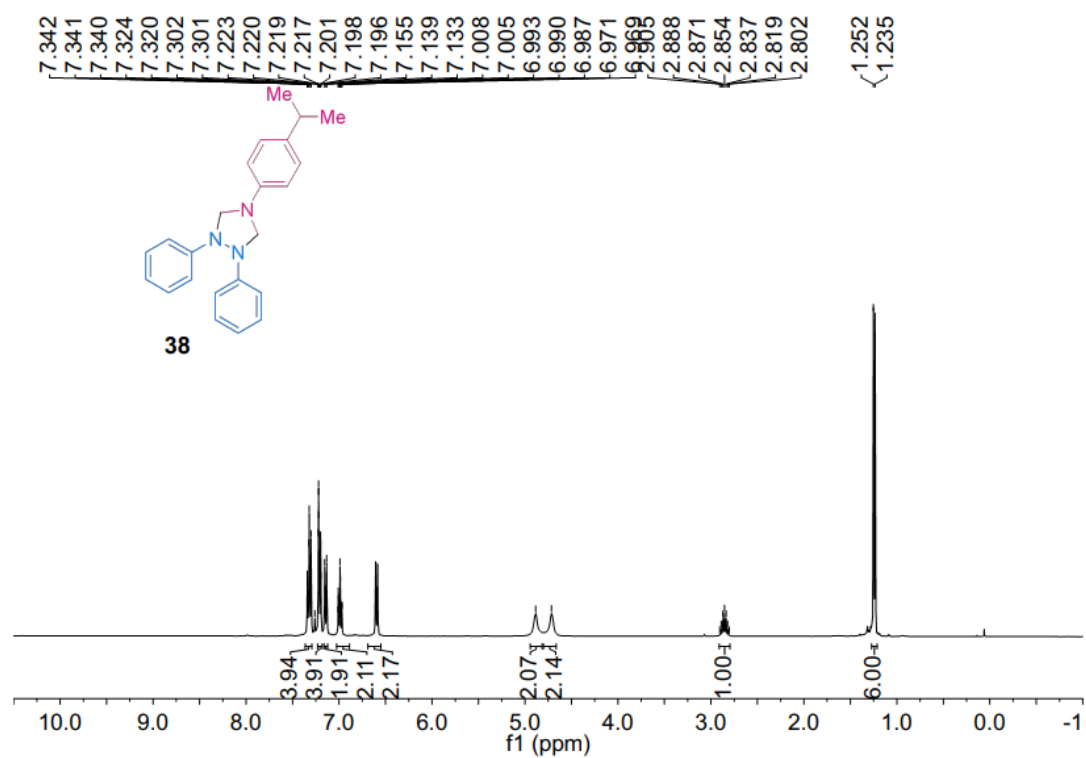

$^{13}\text{C}$  NMR spectrum of **38** (150 MHz,  $\text{CDCl}_3$ ):

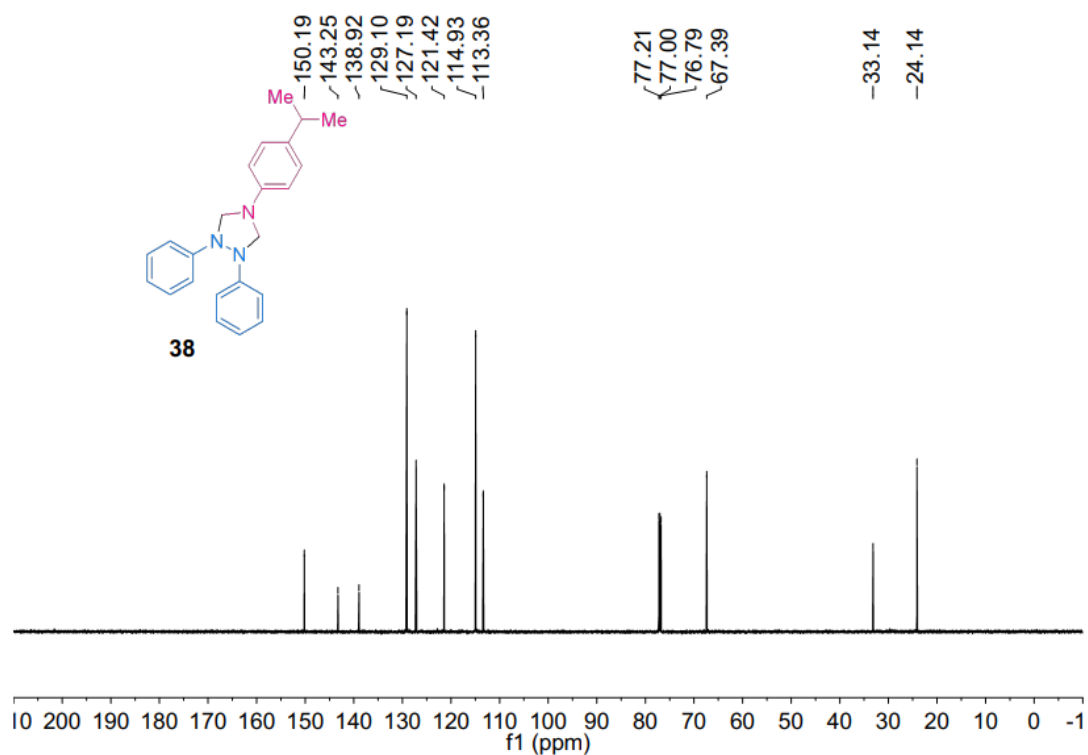

$^1\text{H}$  NMR spectrum of **39** (400 MHz,  $\text{CDCl}_3$ ):

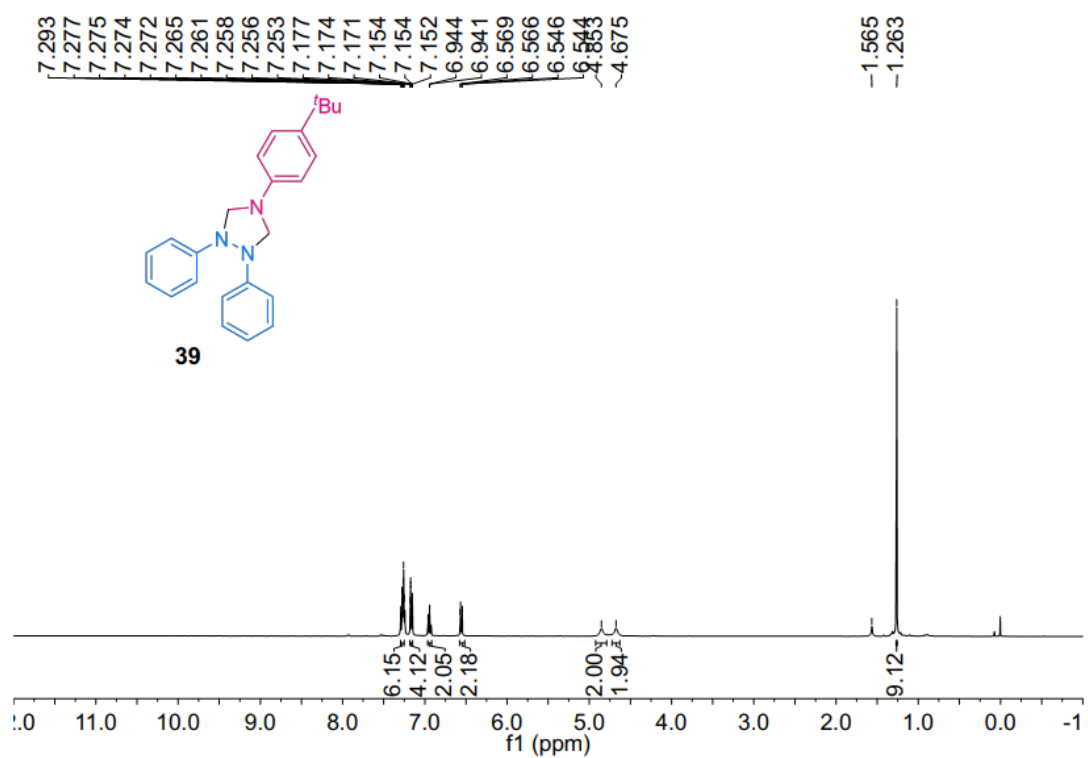

$^{13}\text{C}$  NMR spectrum of **39** (150 MHz,  $\text{CDCl}_3$ ):

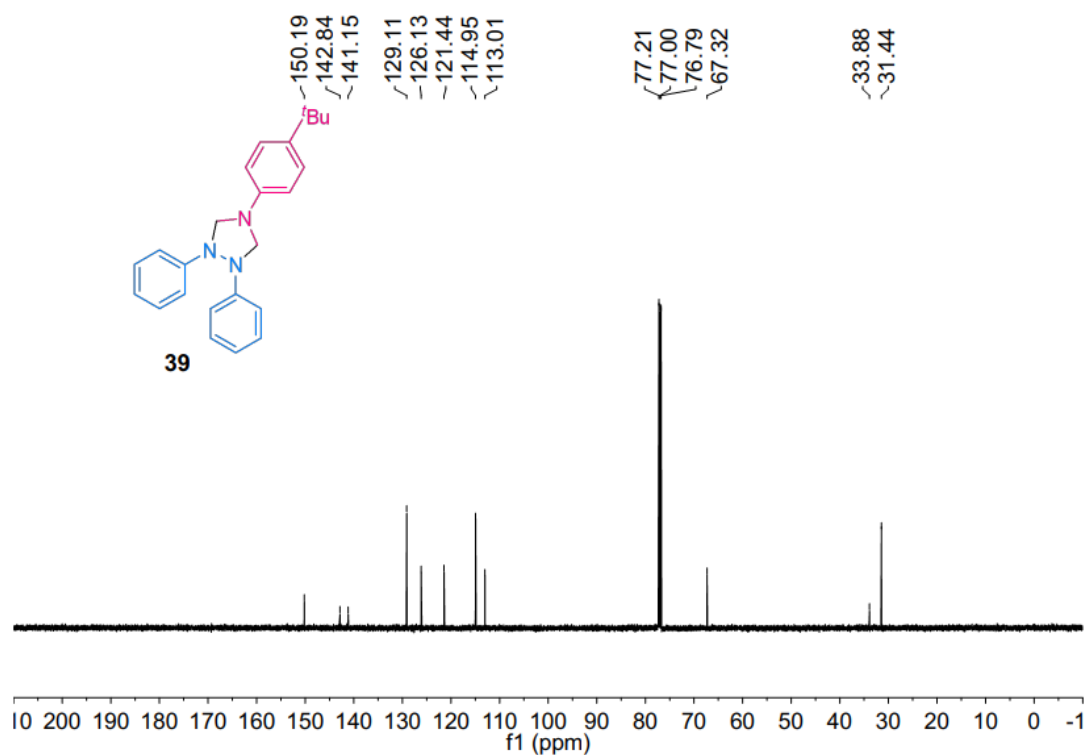

$^1\text{H}$  NMR spectrum of **40** (400 MHz,  $\text{CDCl}_3$ ):

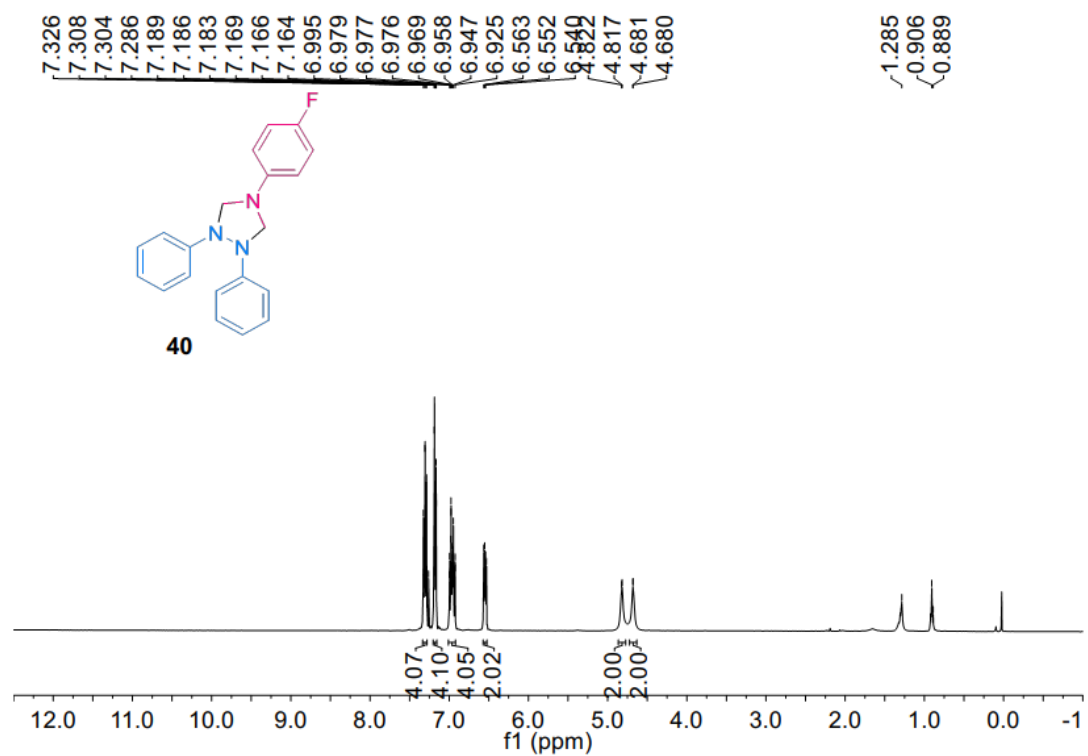

$^{13}\text{C}$  NMR spectrum of **40** (150 MHz,  $\text{CDCl}_3$ ):

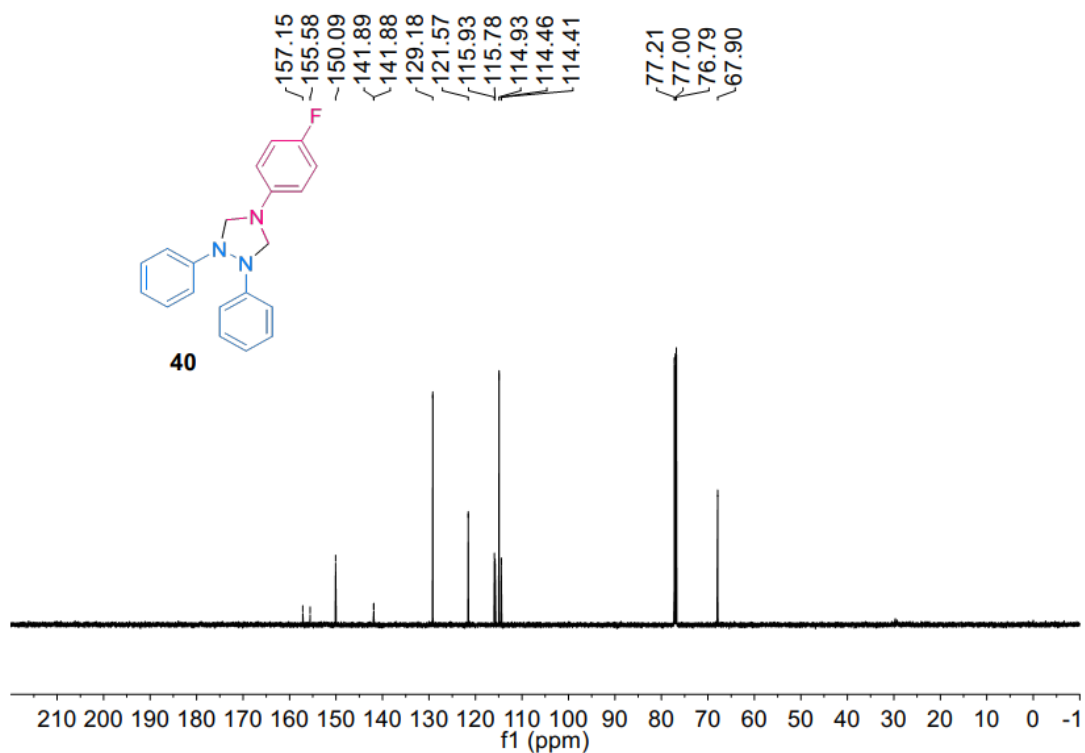

$^{19}\text{F}$  NMR spectrum of **40** (376 MHz,  $\text{CDCl}_3$ ):

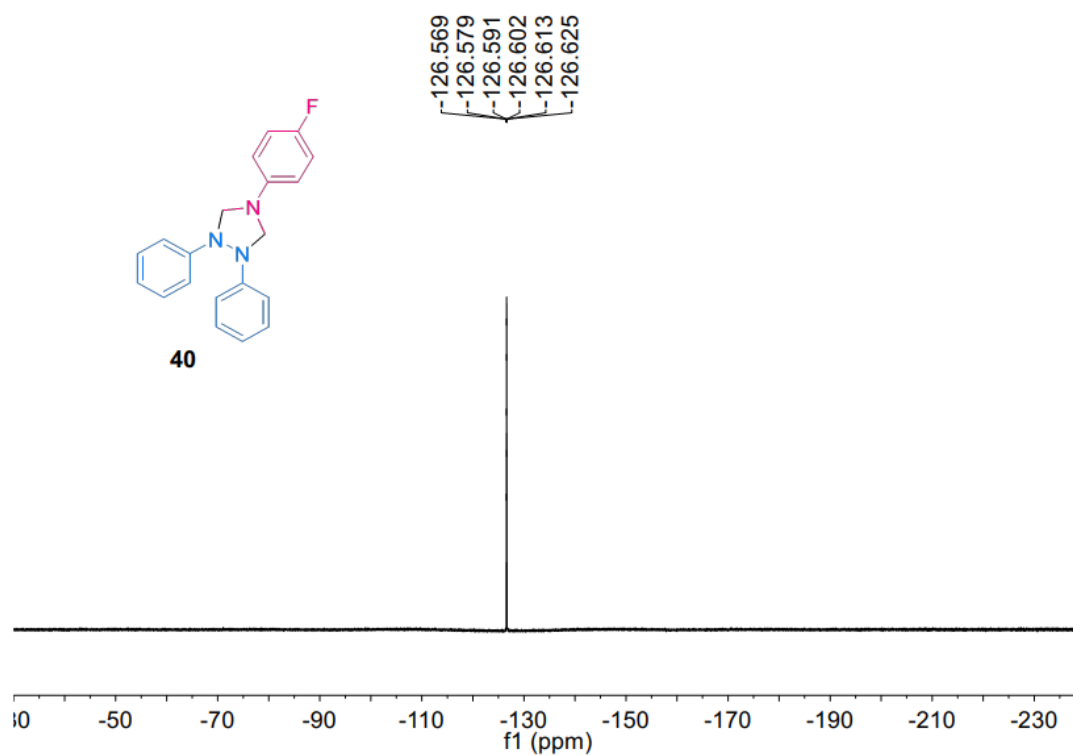



$^1\text{H}$  NMR spectrum of **41** (400 MHz,  $\text{CDCl}_3$ ):

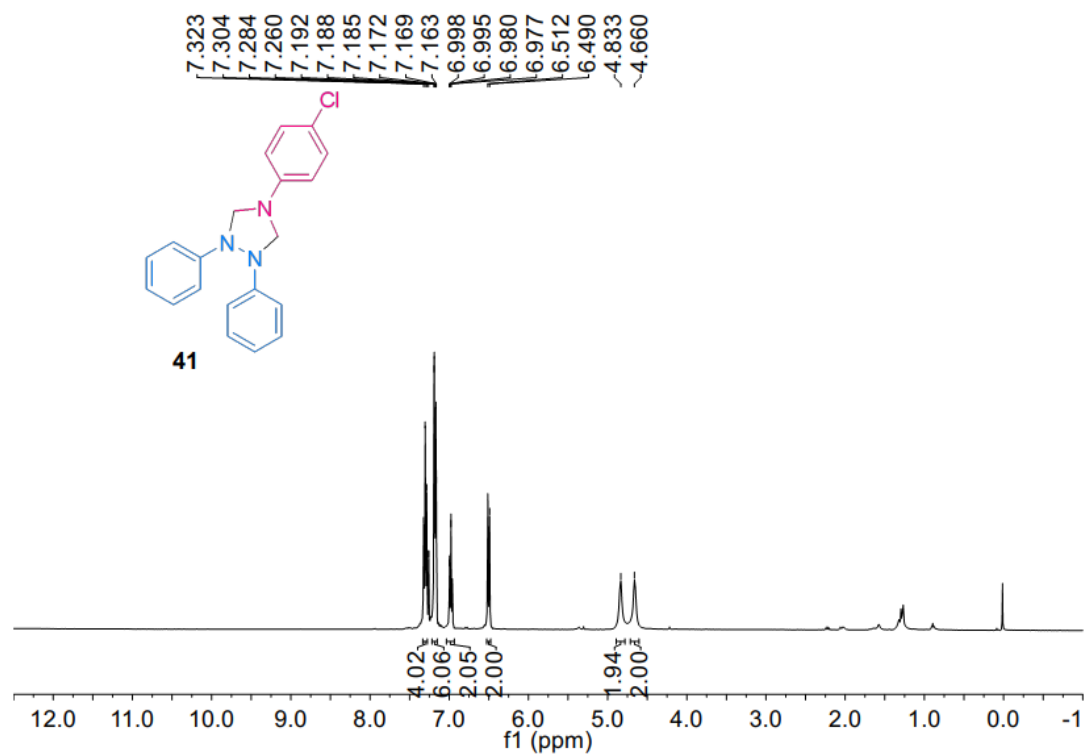

$^{13}\text{C}$  NMR spectrum of **41** (150 MHz,  $\text{CDCl}_3$ ):

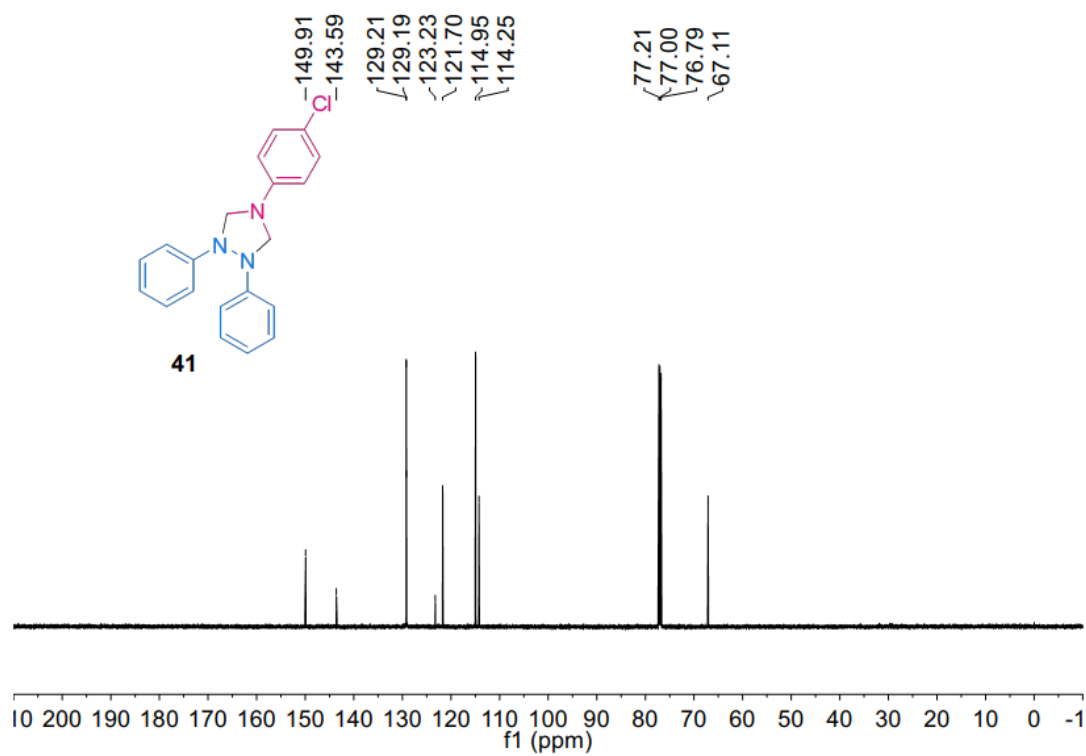

$^1\text{H}$  NMR spectrum of **42** (400 MHz,  $\text{CDCl}_3$ ):

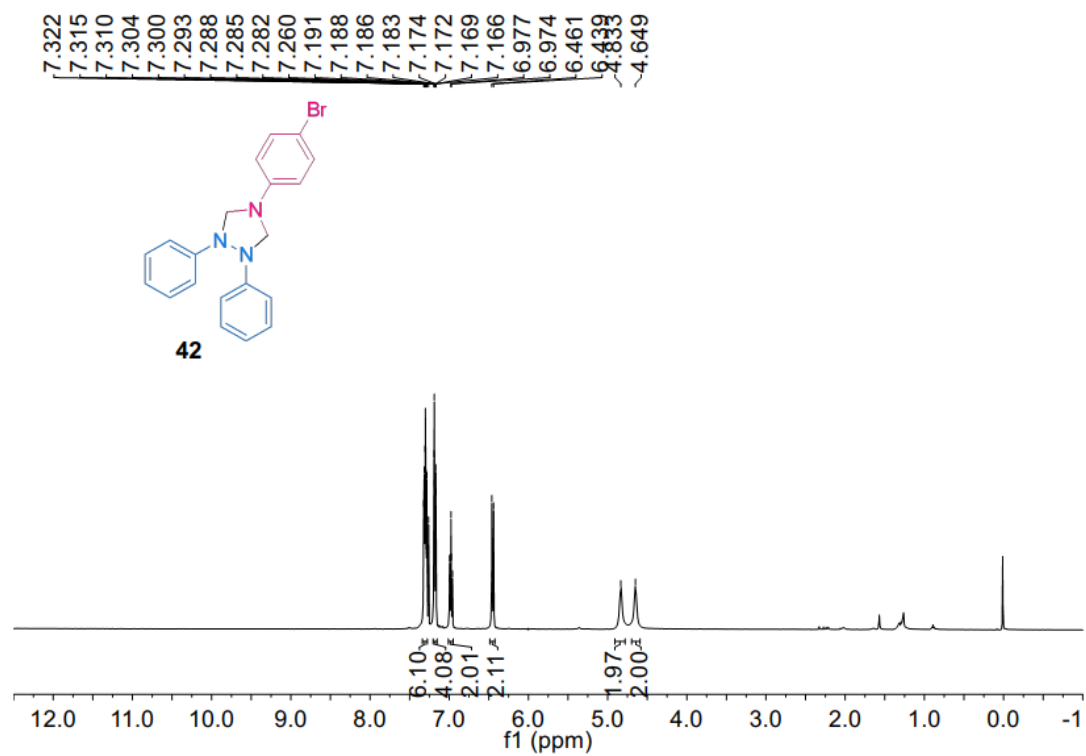

$^{13}\text{C}$  NMR spectrum of **42** (150 MHz,  $\text{CDCl}_3$ ):

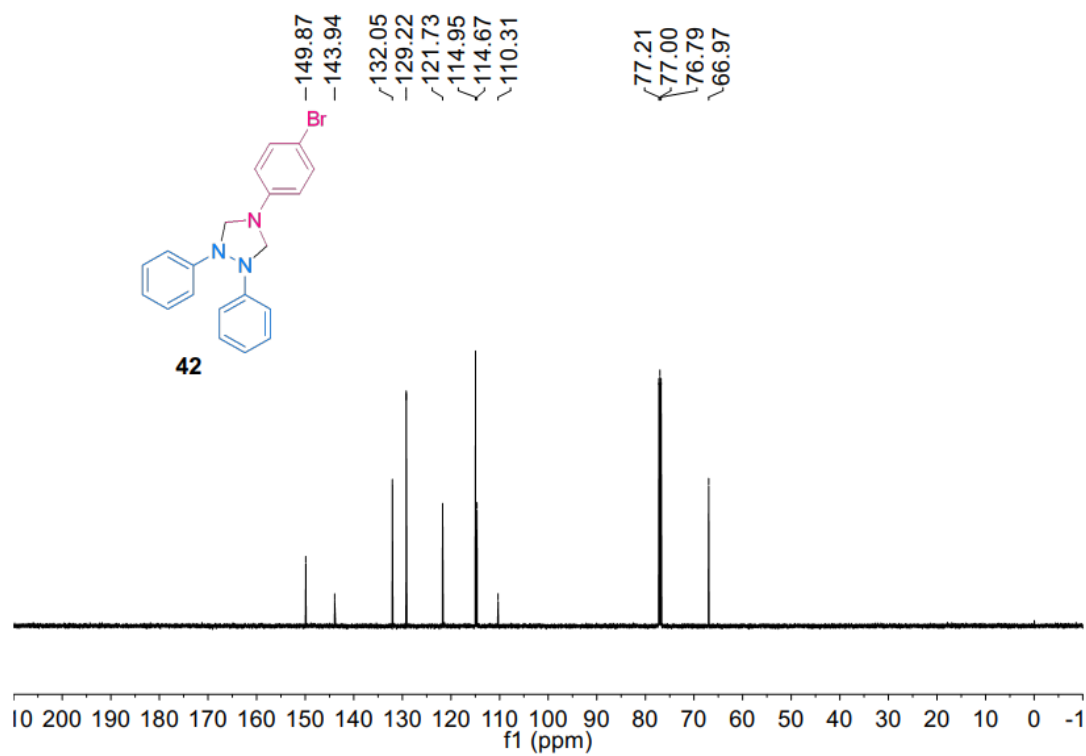

$^1\text{H}$  NMR spectrum of **43** (400 MHz,  $\text{CDCl}_3$ ):

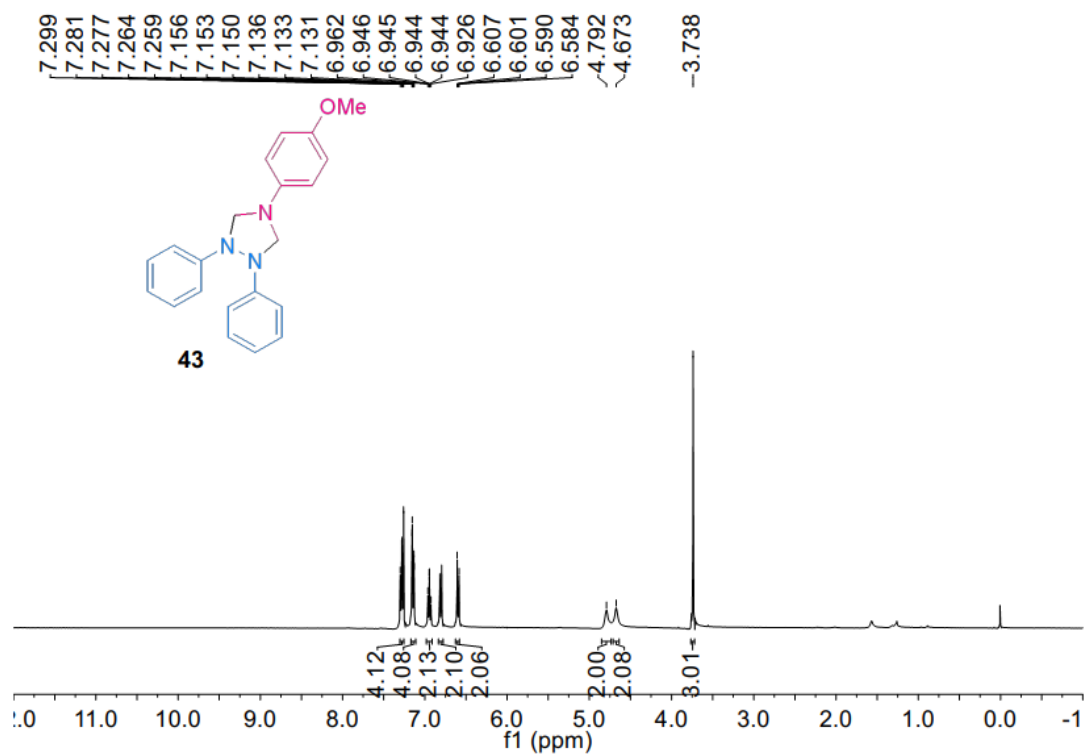

$^{13}\text{C}$  NMR spectrum of **43** (150 MHz,  $\text{CDCl}_3$ ):

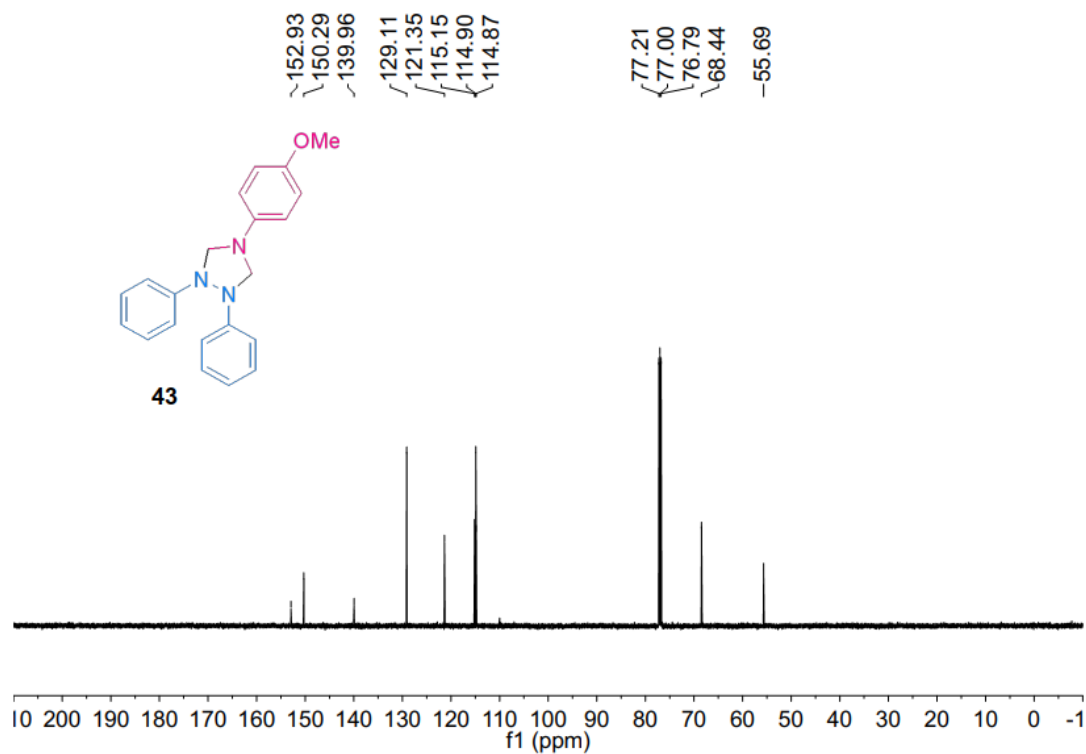

<sup>1</sup>H NMR spectrum of **44** (400 MHz, CDCl<sub>3</sub>):

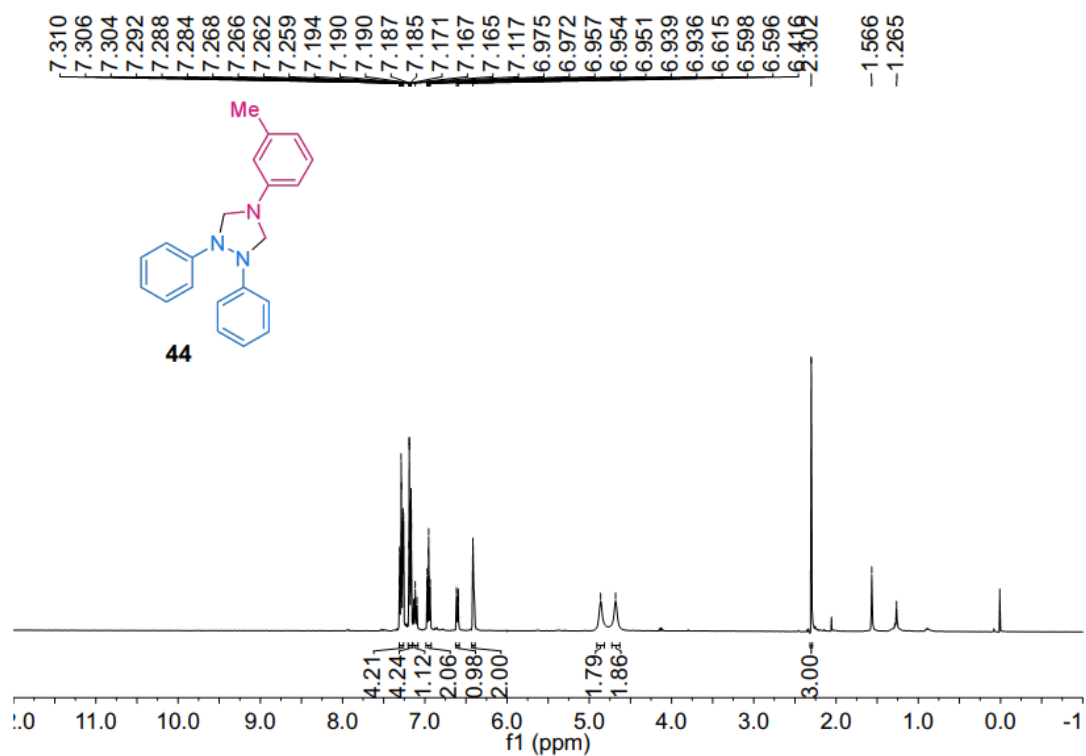

<sup>13</sup>C NMR spectrum of **44** (150 MHz, CDCl<sub>3</sub>):

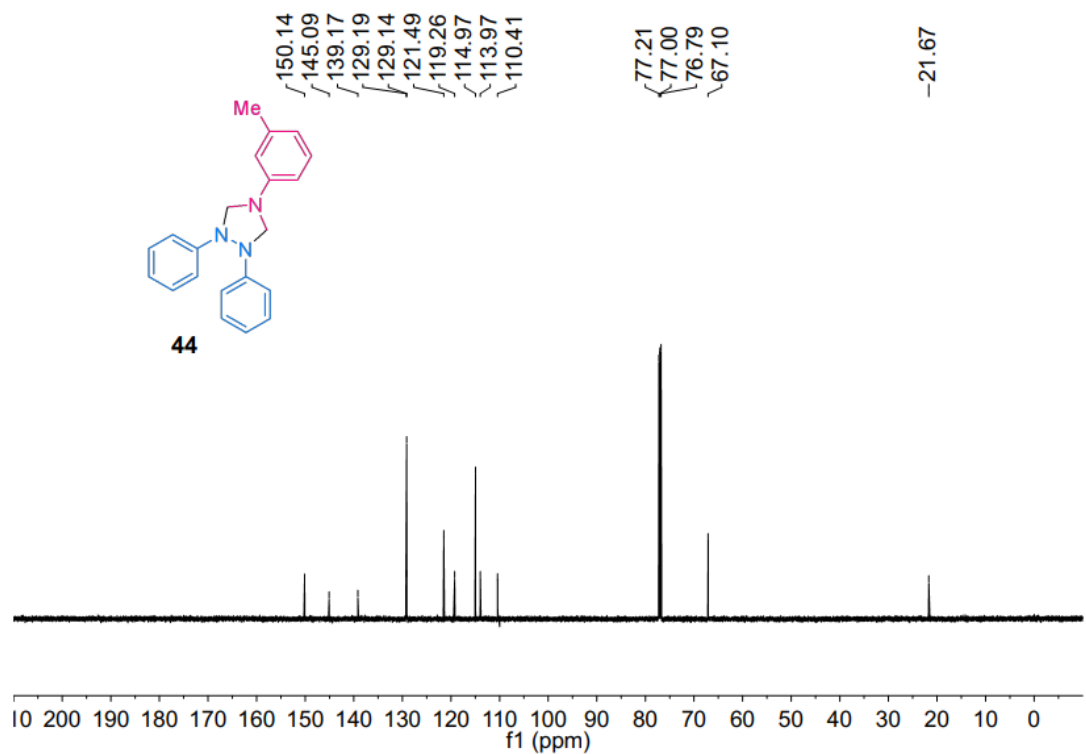

$^1\text{H}$  NMR spectrum of **45** (400 MHz,  $\text{CDCl}_3$ ):

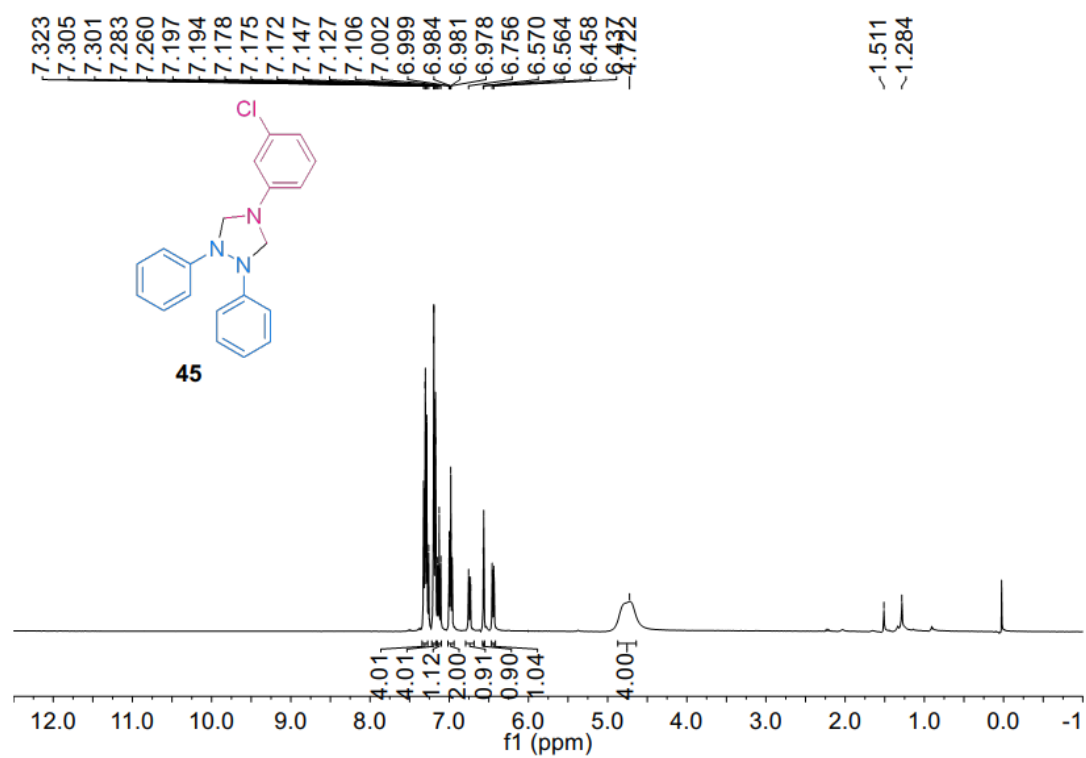

$^{13}\text{C}$  NMR spectrum of **45** (150 MHz,  $\text{CDCl}_3$ ):

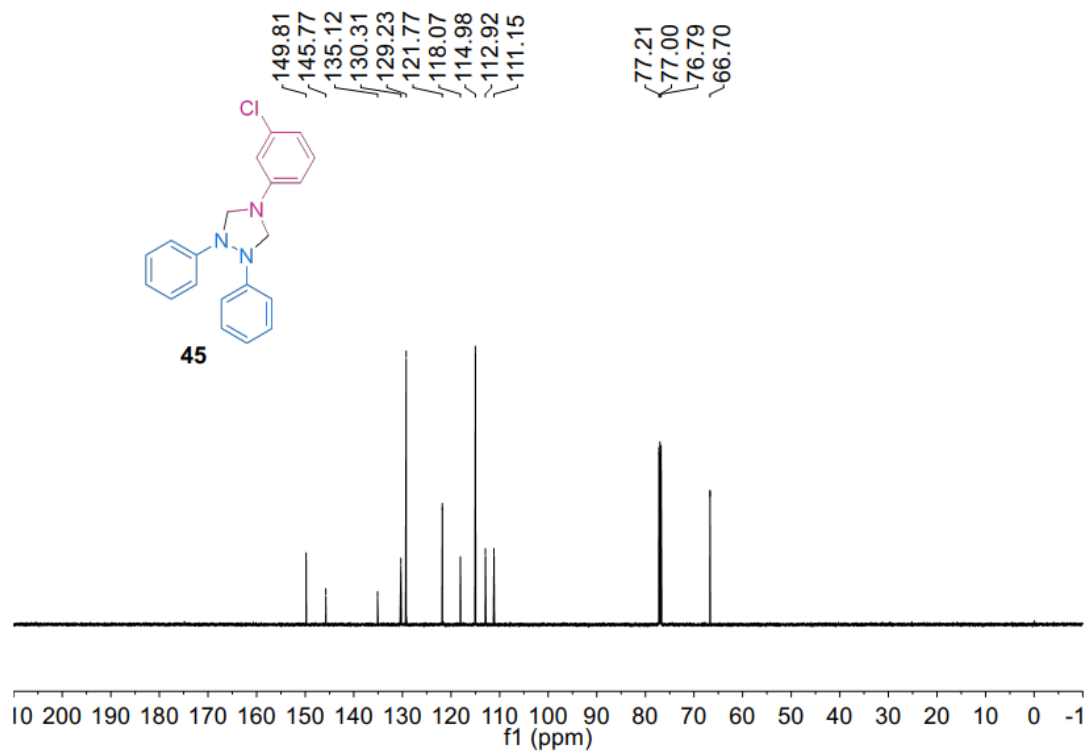

$^1\text{H}$  NMR spectrum of **46** (400 MHz,  $\text{CDCl}_3$ ):

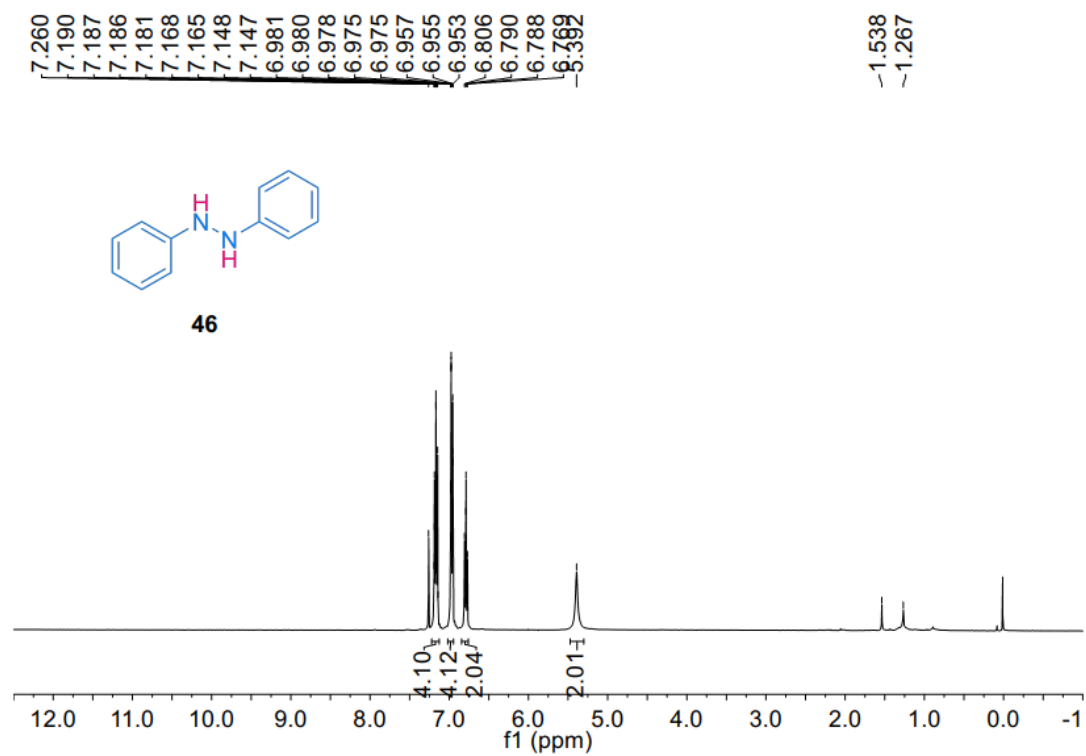

$^{13}\text{C}$  NMR spectrum of **46** (150 MHz,  $\text{CDCl}_3$ ):

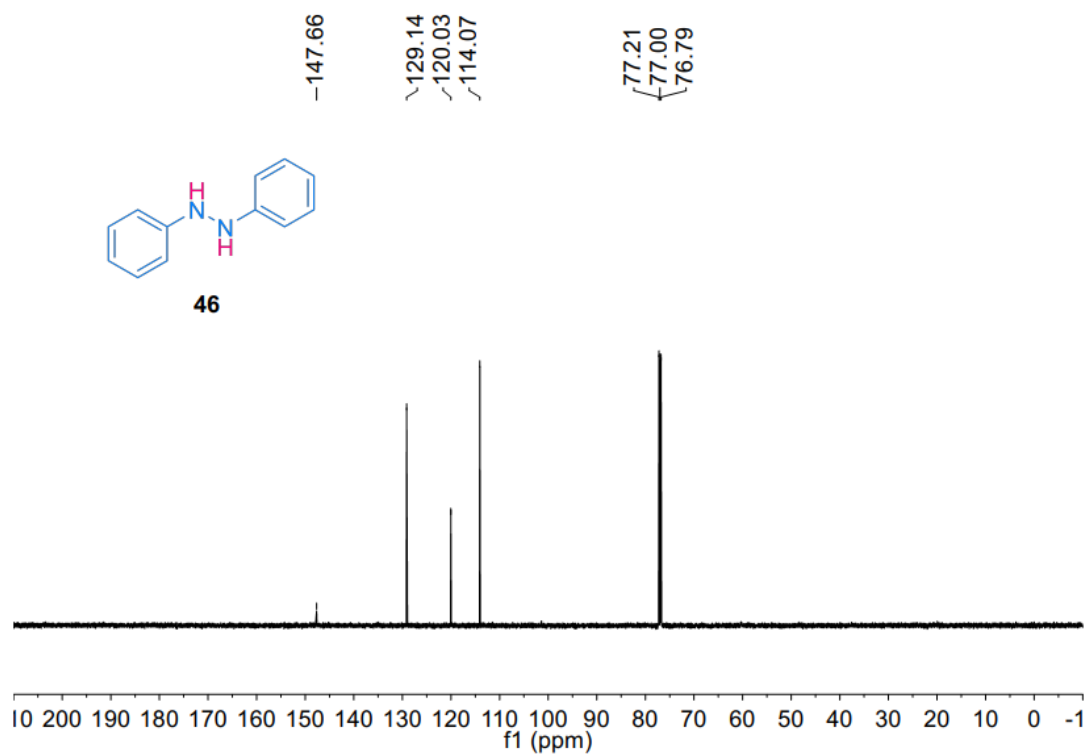

$^1\text{H}$  NMR spectrum of **47** (400 MHz,  $\text{CDCl}_3$ ):

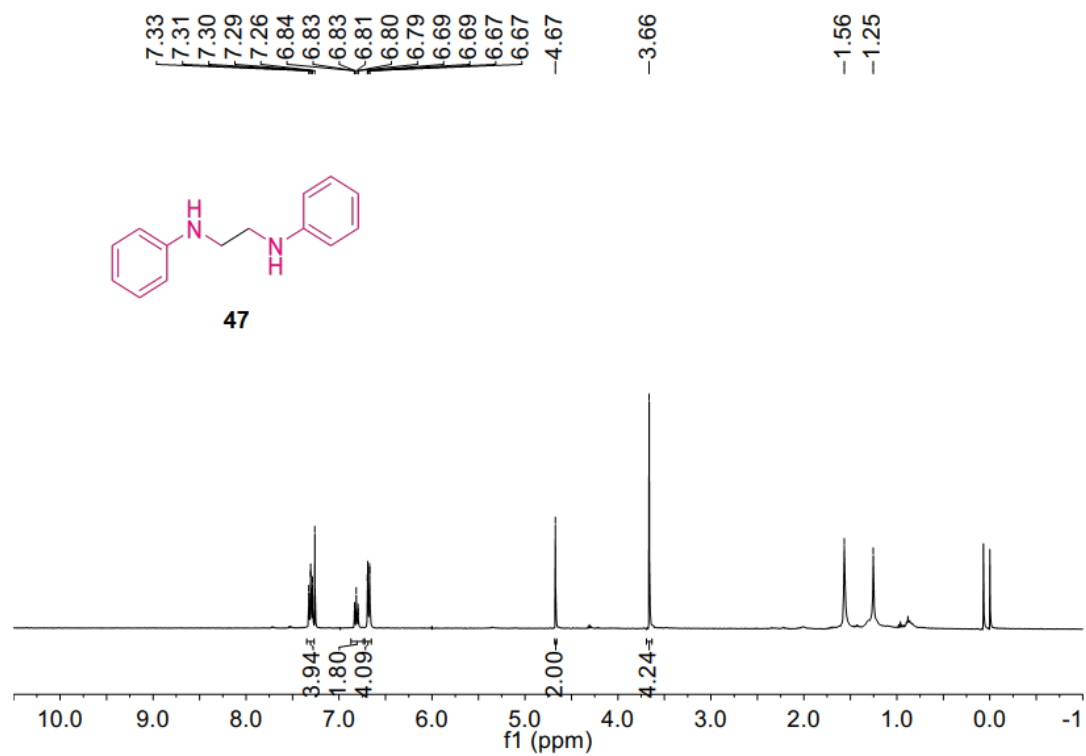

$^{13}\text{C}$  NMR spectrum of **47** (150 MHz,  $\text{CDCl}_3$ ):

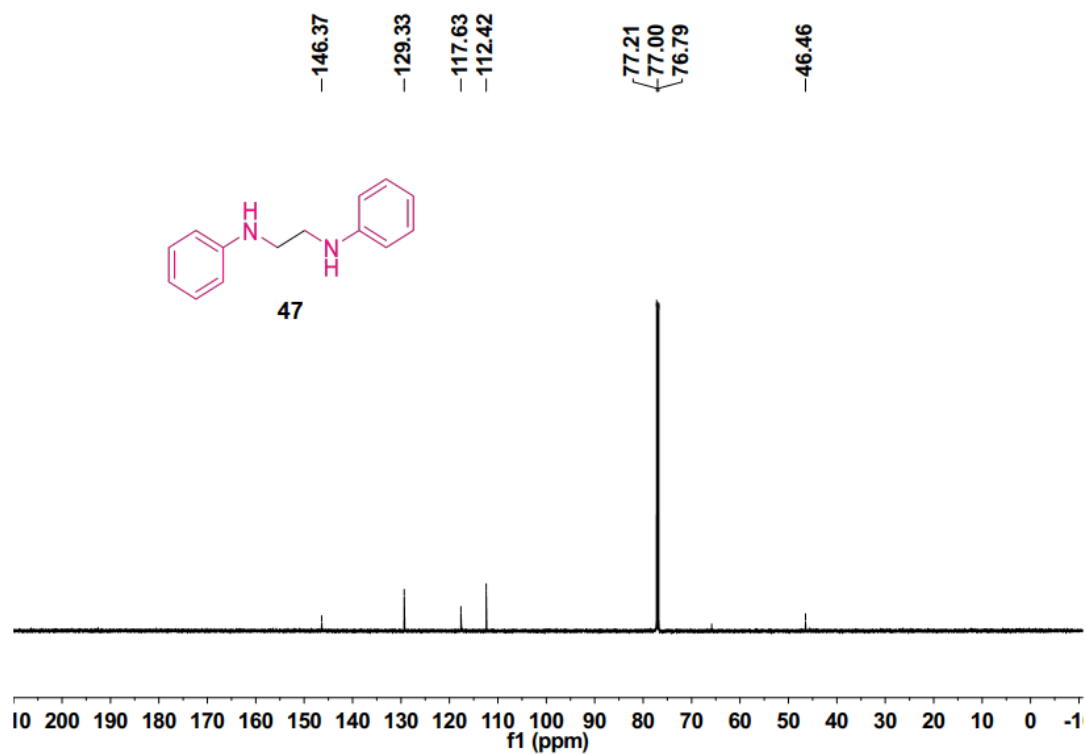

Supplement: d1gc02272e1.pdf [file d1gc02272e1.pdf]
